# Supplementary material for: Potential inhibitors for SARS-CoV-2 Mpro from marine compounds
Source: PubMed Central journal article supplement (PMC9034196; doi:10.1039/d1ra03852d), 2021-06-23
Supplement: RA-011-D1RA03852D-s001.pdf [file RA-011-D1RA03852D-s001.pdf]

## Supporting Information

# Potential inhibitors for SARS-CoV-2 Mpro from Marine compounds

**Nguyen Minh Tam,<sup>ab+</sup> Minh Quan Pham,<sup>cd+</sup> Huy Truong Nguyen,<sup>e</sup> Nam Dao Hong,<sup>f</sup> Nguyen Khoa Hien,<sup>dg</sup> Duong Tuan Quang,<sup>h</sup> Huong Thi Thu Phung,<sup>i</sup> and Son Tung Ngo<sup>bj\*</sup>**

<sup>a</sup>. Computational Chemistry Research Group, Ton Duc Thang University, Ho Chi Minh City, Vietnam

<sup>b</sup>. Faculty of Applied Sciences, Ton Duc Thang University, Ho Chi Minh City, Vietnam

<sup>c</sup>. Graduate University of Science and Technology, Vietnam Academy of Science and Technology, Hanoi, Vietnam

<sup>d</sup>. Institute of Natural Products Chemistry, Vietnam Academy of Science and Technology, Hanoi, Vietnam

<sup>e</sup>. Faculty of Pharmacy, Ton Duc Thang University, Ho Chi Minh City, Vietnam

<sup>f</sup>. University of Medicine and Pharmacy at Ho Chi Minh City, Ho Chi Minh City, Vietnam

<sup>g</sup>. Mien Trung Institute for Scientific Research, Vietnam Academy of Science and Technology, Hue City, Thua Thien Hue Province, Vietnam

<sup>h</sup>. Department of Chemistry, Hue University, Hue City, Thua Thien Hue Province, Vietnam

<sup>i</sup>. NTT Hi-Tech Institute, Nguyen Tat Thanh University, Ho Chi Minh City, Viet Nam

<sup>j</sup>. Laboratory of Theoretical and Computational Biophysics, Ton Duc Thang University, Ho Chi Minh City, Vietnam.

<sup>+</sup> Authors equally contribute to the work.

\*Email: [ngosontung@tdtu.edu.vn](mailto:ngosontung@tdtu.edu.vn)

**Table S1.** List of marine compounds and docking energy to SARS-CoV-2 Mpro.

| N <sup>o</sup> | Name | SMILES                                                                                                                                                                                                     | $\Delta G_{\text{Dock}}$ | Marine source                                      |
|----------------|------|------------------------------------------------------------------------------------------------------------------------------------------------------------------------------------------------------------|--------------------------|----------------------------------------------------|
| 1              | M1   | <chem>Cc1cc2c(c(c1)O)C(=O)c1c(ccc(c3c(C)cc(c4c3C(=O)c3cccc(c3C4=O)O)O)c1O)C2=O</chem>                                                                                                                      | -10.6                    | <i>Laurenica spectabilis</i>                       |
| 2              | M2   | <chem>C1(=C)C[C@@H]2[C@@H]3[C@]4([C@@H]1C[C@H]4C(O[C@@H]1[C@H]4[C@@H]3[C@@H])(C[C@@H]2Cl)[NH2+][C@H]4[C@]2([C@H]1CC[C@@]1([C@]2(C)CC[C@H]2[C@@]31[C@H]([C@H]([C@H](O2)C(=C)C)O)O3)O)C)(C)C)O</chem>        | -10.2                    | <i>Mucor irregularis</i>                           |
| 3              | M3   | <chem>c1ccc2c(c1)N=C([N+](C2=O)[C@H]1C[C@]2(OC1=O)c1c(N3[C@H]2NC2(C3=O)CC2)cccc1)C(=O)N</chem>                                                                                                             | -9.9                     | <i>Aspergillus versicolor</i> LZD-14-1             |
| 4              | M4   | <chem>C1(=C)C[C@@H]2[C@@H]3[C@H]4[C@@H]1C[C@H]4C(O[C@@H]1[C@H]4[C@@H]3[C@@H])(C[C@@H]2Cl)[NH2+][C@H]4[C@]2([C@H]1CC[C@@]1([C@]2(C)CC[C@H]2[C@@]31[C@H]([C@H]([C@H](O2)C(=C)C)O)O3)O)C)(C)C</chem>          | -9.9                     | <i>Mucor irregularis</i>                           |
| 5              | M5   | <chem>c1ccc2c(c1)N=C1[N+](C2=O)[C@@H]2C(=O)N[C@@H]1N1[C@@H]3[C@]([C2](c2c(N3C(=O)C31CC3)cccc2)O</chem>                                                                                                     | -9.8                     | <i>Aspergillus versicolor</i> LCJ-5-4              |
| 6              | M6   | <chem>[C@H]12N3C(=O)[C@@H](N(C=O)[C@@H]3C[C@]1(c1cccc1N2)[C@]12[C@@H](N3C(=O)[C@@H](N(C=O)[C@@H]3C1)C)Cc1cccc1)Nc1c2cccc1)C)Cc1cccc1</chem>                                                                | -9.8                     | Mangrove endophytic fungus<br>Gx-3a                |
| 7              | M7   | <chem>c1ccc2c(c1)N=C1[N+](C2=O)[C@@H]2C(=O)N[C@H]1O[C@@]1([C@@H]3NC4(C(=O)N3c3c1cccc3)CC4)C2</chem>                                                                                                        | -9.7                     | <i>Aspergillus versicolor</i> LZD-14-1             |
| 8              | M8   | <chem>c1(c(cc(c2c1cccc2O)O)c1cccc1)C1=CC(=C(C(=O)[OH+])1)CC1=C(C=C([OH+]C1=O)[C@@H]1[C@](CC(=O)c2c1cccc2O)(c1cccc1)O)O</chem>                                                                              | -9.7                     | <i>Streptomyces</i> sp.                            |
| 9              | M9   | <chem>c1(c(cc(c2c1cccc2O)O)c1cccc1)C1=CC(=C(C(=O)[OH+])1)CC1=C(C=C([OH+]C1=O)[C@H]1[C@](CC(=O)c2c1cccc2O)(c1cccc1)O)O</chem>                                                                               | -9.7                     | <i>Streptomyces</i> sp.                            |
| 10             | M10  | <chem>c1ccc2c(c1)N=C1[N+](C2=O)[C@@H]2C(=O)N3[C@H]1O[C@@]1([C@@H]4N(C3)[C@H](C(=O)N4c3c1cccc3)C)C2</chem>                                                                                                  | -9.6                     | <i>Aspergillus versicolor</i> LZD-14-1             |
| 11             | M11  | <chem>c1ccc2c(c1)N=C1[N+](C2=O)[C@@H]2C(=O)N[C@@H]1N1[C@@H]3[C@]([C2](c2c(N3C(=O)[C@H]1C)cccc2)O</chem>                                                                                                    | -9.6                     | <i>Aspergillus versicolor</i> LCJ-5-4              |
| 12             | M12  | <chem>C1CC[C@H]2[C@@H](C1)[NH2+][C@H]2[C@@]12[C@@H]3[C@H](CCCC3)N[C@@H]1N1[C@]3([C@H]2O)C(=O)N([C@@](C1=O)(C)SSS3)C</chem>                                                                                 | -9.6                     | <i>Acrostalagmus luteoalbus</i>                    |
| 13             | M13  | <chem>[C@]12([C@H]3C(=C)C[C@@H]4[C@@H]1[C@H]1[C@@H](C[C@H]4Cl)[NH2+][C@@H]4[C@H]1[C@@H](OC([C@H]2C3)(C)C)O[C@]1([C@]4([C@@]2([C@@]([CC1])([C@]13[C@H](CC2)O[C@@H]([C@@H]([C@H]1O3)O)C(=C)C)O)C)OC)O</chem> | -9.5                     | <i>Mucor irregularis</i> QEN-189                   |
| 14             | M14  | <chem>c1ccc2c(c1)[nH+]c1c2cc([nH]c1C(=O)C)C(=O)NCC[C@H]1[C@H]2[C@H]([NH2+])C1)CCCC2</chem>                                                                                                                 | -9.4                     | <i>Marinactinospora thermotolerans</i> SCSIO 00652 |

|    |     |                                                                                                                                                                                                                                                   |      |                                               |
|----|-----|---------------------------------------------------------------------------------------------------------------------------------------------------------------------------------------------------------------------------------------------------|------|-----------------------------------------------|
| 15 | M15 | C1[C@@H]([C@@H]([C@H]([C@@H](O)O[C@@H]1[C@H]([C@@H]([C@H]([C@@H](O)O)c1c(c2c(c1)OC)C(=O)c1c([OH+2]cccc1)OC)O)O)O)O                                                                                                                                | -9.4 | <i>Phomopsis</i> sp. ZH76                     |
| 16 | M16 | [C@@]123OC(=O)CC/C=C/C(=O)[C@H](C/C=C/[C@H]1[C@@H](C=C)[C@H]([C@H]2[C@@H](NC3=O)Cc1cccc1)C)O)C\C                                                                                                                                                  | -9.4 | <i>Arthrinium arundinis</i> ZSDS1-F3          |
| 17 | M17 | O1[C@@]2([C@@H]3N(c4c2cccc4)C(=O)[C@@H](N3)C)[C@H]2[N+3]C(=Nc4c(C3=O)cccc4)[C@]1(NC2=O)C                                                                                                                                                          | -9.3 | <i>Aspergillus</i> sp.                        |
| 18 | M18 | c12c(cc(cc1[OH+]c1c(C2=O)c(cc(c1)OC)[C@H]1[C@@H](c2c(C1=O)cc(cc2O)O)C)c1c(cc(cc1O)C)O)C)O                                                                                                                                                         | -9.3 | <i>Ascomycota</i> sp. SK2YWS-L                |
| 19 | M19 | O=C1c2cc(OC)cc(O)c2[C@H](c2c(O)cc(C)cc2O)[C@H]1c1cc(OC)cc2c1C(=O)c1c([OH+2]cc(C)cc1O                                                                                                                                                              | -9.3 | <i>Ascomycota</i> sp. SK2YWS-L                |
| 20 | M20 | c1cc(ccc1)C[C@@H]1NC(=O)CN(C(=O)[C@H]2N(C(=O)[C@H](N(C(=O)[C@@H](NC(=O)[C@@H](NC(=O)[C@@H](N(C1=O)C)Cc1ccc(cc1)O)C(C)CC(C)C)C)Cc1ccc(cc1)O)CCC2)C                                                                                                 | -9.2 | <i>Acremonium persicinum</i><br>SCSIO115      |
| 21 | M21 | C1=C[C@H]2[C@@H](OC1(C)C)[C@@H]1[C@H](C2)[C@@H]([C@H]([NH2+]1)C(C)(C=C)C)/C=C\1/C(=O)N2[C@@H](C(=O)N1)CCC2                                                                                                                                        | -9.2 | <i>Aspergillus versicolor</i>                 |
| 22 | M22 | C1C[C@H]2[C@@H](CC1)[C@H](C[NH2+]2)C[C@@H]1[C@H]2[C@@]3(C(=O)N1)[C@H]([C@@H]([C@@]([C@H]2C)(C)O)C)/C=C/C[C@H](C)/C=C/C(=O)[C@@H](O)CCC3=O)\C                                                                                                      | -9.2 | <i>Chaetomium globosum</i>                    |
| 23 | M23 | O=c1c2cccc2ncn1[C@@H]1C[C@]2([C@H]3N(C1=O)[C@H](C(=O)N3c1c2cccc1)C)O                                                                                                                                                                              | -9.2 | <i>Penicillium</i> sp.                        |
| 24 | M24 | C1C[C@H]2[C@@H](CC1)[C@@H](C[NH2+]2)C[C@@H]1[C@H]2[C@@]3(C(=O)N1)[C@H]([C@@H](C(=C2)C)O)/C=C/C[C@H](C)/C=C/C(=O)[C@@H](O)CCC3=O)\C                                                                                                                | -9.1 | <i>Chaetomium globosum</i>                    |
| 25 | M25 | O1[C@H]([C@H]([C@H](C[C@@H]1O[C@@H]1C[C@@](O[C@@H]([C@H]1CC)C)([C@H]([C@@H]([C@@H]([C@@H]1[C@H](/C=C/C=C(C)O)[C@@H](C@H)(/C=C/C=C(C)O)O1)C)[C@H]([C@@H]([C@@H](C1=C[C@H]([C@@H]([C@H](O1)C)CC)O[C@H]1C[C@@H]([C@@H]([C@@H](O1)C)O)C)O)C)O)C)O)O)C | -9.1 | <i>Streptomyces</i> sp.                       |
| 26 | M26 | c1cccc(c1O)C1=N[C@@H](CO1)[C@@H]1SC[C@@H](N1C)CN1[C@@H]2C(=O)N([C@H](C1=O)CSSC2)C[C@@H]1N([C@@H](SC1)[C@H]1N=C(OC1)c1c(O)cccc1)C                                                                                                                  | -9.1 | <i>Streptomyces olivaceus</i>                 |
| 27 | M27 | [C@]123[C@@H]4CC[C@@H]([C@]4(CC[C@@H]1[C@]1(CC[C@@H](C[C@]1(OO2)C=C3)O)C)C)[C@H](C)/C=C/[C@@H](C(C)C)C                                                                                                                                            | -9.1 | <i>Paecilomyces lilacinus</i> ZBY-1           |
| 28 | M28 | C1CC[C@H]2[C@@H](C1)[NH2+]C[C@H]2[C@@]12[C@@H]3[C@H](CCCC3)N[C@@H]1N1[C@]3([C@H]2O)C(=O)N([C@@](C1=O)(CO)SSS3)C                                                                                                                                   | -9.1 | <i>Acrostalagmus luteoalbus</i> SCSIO<br>F457 |
| 29 | M29 | C/C=C/[C@@H]1[C@H]2[C@H](CC[C@@H]2C=C[C@H]1C(=O)C1=C(C=C[NH+]C1=O)c1ccc(cc1)O)O)C                                                                                                                                                                 | -9.1 | <i>Campylocarpon</i> sp. HDN13-307            |

|    |     |                                                                                                                                                                                                                          |      |                                            |
|----|-----|--------------------------------------------------------------------------------------------------------------------------------------------------------------------------------------------------------------------------|------|--------------------------------------------|
| 30 | M30 | [C@]12([C@H]3C(=C)C[C@H]4[C@H]1[C@@H]1[C@@H](C[C@H]4Cl)[NH2+][C@@H]4[C@H]1[C@@H](OC([C@H]2C3)(C)O)[C@]1([C@]4([C@@]2([C@@](CC1)([C@]13[C@H](CC2)O)[C@@H]([C@@H]([C@H]1O3)O)C(=C)O)C)C)O)O                                | -9.1 | <i>Mucor irregularis</i> QEN-189           |
| 31 | M31 | C1(=C)C[C@@H]2[C@@H]3[C@H]4[C@@H]1C[C@H]4C(O[C@@H]1[C@H]4[C@@H]3[C@H](C[C@@H]2Cl)[NH2+][C@H]4[C@]2([C@H]1CC[C@@]1([C@]2(C)CC[C@H]2C1=C([C@H]([C@H](O2)C(=C)O)O)C)C)C                                                     | -9.1 | <i>Mucor irregularis</i> QEN-189           |
| 32 | M32 | [C@H]1([C@H](C[C@@H]2[C@H](C1)[C@H](C[NH2+])2)[C@H]1[C@H](C[NH2+])1)[C@H]1[C@@H]2[C@H]([NH2+])1C[C@@H]([C@@H](C2)Cl)Cl)Cl                                                                                                | -9.1 | <i>Marine actinomycete</i> NPS12745        |
| 33 | M33 | c1ccc(cc1)C[C@@H]1NC(=O)CN(C(=O)[C@H]2N(C(=O)[C@H](N(C(=O)[C@@H](NC(=O)[C@H](NC(=O)[C@H](N(C1=O)C)Cc1ccc(cc1)O)[C@H](C)CC)CC(C)C)Cc1ccc(cc1)O)CCC2)C                                                                     | -9   | <i>Acremonium persicinum</i> SCSIO115      |
| 34 | M34 | c1ccc2c(c1)NC(=O)[C@H]2[C@@H]1C(=O)Nc2c1cccc2                                                                                                                                                                            | -9   | <i>Shewanella piezotolerans</i>            |
| 35 | M35 | c1ccc2c(c1)N=C1[N+](C2=O)[C@@H]2C(=O)N[C@@H]1N1[C@@H]3[C@](C2)(c2c(N3C(=O)[C@@H]1C[C@H](CC)C)cccc2)O                                                                                                                     | -9   | <i>Aspergillus versicolor</i> LCJ-5-4      |
| 36 | M36 | [C@]123[C@@H]4CC[C@@H]([C@]4(CC=C1[C@]1(CC[C@@H](C[C@]1(OO2)C=C3)O)C)C)[C@H](C)/C=C/[C@H](C)C)C                                                                                                                          | -9   | <i>Paecilomyces lilacinus</i> ZBY-1        |
| 37 | M37 | C1CC[C@H]2[C@@H](C1)[NH2+][C@H]2[C@@]12[C@@H]3[C@H](CCCC3)N[C@@H]1N1[C@]3(C2)C(=O)N([C@@](C1=O)(CO)SSS3)C                                                                                                                | -9   | <i>Acrostalagmus luteoalbus</i> SCSIO F457 |
| 38 | M38 | C1(=O)[C@H]2N(C(=O)[C@H](NC(=O)[C@H]([C@H](OC(=O)[C@@H](N(C)C(=O)CN1C)C)C)C)NC(=O)c1ccc(c3c1Nc1c(O3)c(c3c(c1C(=O)N[C@H]1[C@@H](C)OC(=O)[C@H](C)C)N(C(=O)CN(C)C(=O)[C@@H]4CCCN4C(=O)[C@@H](C)C)NC1=O)C)nc(o3)C)C)C)C)CCC2 | -8.9 | <i>Streptomyces</i> sp. IMB094             |
| 39 | M39 | c1ccc2c(c1)N=C1[N+](C2=O)[C@@H]2C[C@H]([C@]3(O[C@H]1NC2=O)[C@H]1N(c2c3cccc2)C(=O)[C@@H](N1)[C@@H](C)CC)O                                                                                                                 | -8.9 | <i>Aspergillus versicolor</i> LZD-14-1     |
| 40 | M40 | C1=C[C@H]2[C@H](OC1(C)C)C[C@@H]1[C@@H](C2)[C@H]2C[C@]34[C@H](C[C@]5(N(C3=O)CCC5)C(=O)N4)C([C@@H]2[NH2+])1)C)C                                                                                                            | -8.9 | <i>Aspergillus versicolor</i>              |
| 41 | M41 | [C@H]12CC[C@]3([C@H]([C@]1(CC[C@@H](C2)C(C)O)C)C(=O)C1=C(O3)C(=O)C(=CC1=O)[C@@H](C(=O)/C=C/C)/C)C)C                                                                                                                      | -8.9 | <i>Nigrospora</i> sp. MA75                 |
| 42 | M42 | C1[C@H]2[C@@](O[C@@]31c1cccc1[C@@H]1[C@@H]3CC(C1=C)(C)C(C)(C(=O)C1=Nc3cccc3C(=O)[N+]2)1)C)O                                                                                                                              | -8.9 | <i>Neosartorya Fischeri</i>                |
| 43 | M43 | N1=C2[N+](C(=O)c3cccc13)[C@@H](C(=O)N[C@H]2C(C)C)[C@H]1C[NH2+][C@@H]2[C@H]1CCCC2                                                                                                                                         | -8.9 | <i>Neosartorya Fischeri</i>                |
| 44 | M44 | C1CC[C@H]2[C@@H](C1)[NH2+][C@H]2[C@@]12[C@@H]3[C@H](CCCC3)N[C@@H]1N1[C@]3([C@H]2O)C(=O)N([C@@](C1=O)(C)SS3)C                                                                                                             | -8.9 | <i>Acrostalagmus luteoalbus</i> SCSIO F457 |
| 45 | M45 | c12c([NH+][C(=O)[N+](C1=O)[C@@H]1c3cccc3NC1=O)cccc2                                                                                                                                                                      | -8.8 | <i>Shewanella piezotolerans</i>            |

|    |     |                                                                                                                                |      |                                                    |
|----|-----|--------------------------------------------------------------------------------------------------------------------------------|------|----------------------------------------------------|
| 46 | M46 | c1ccc2c(c1)N=C1[N+](C2=O)[C@H]2[C@@]3([C@@H]4N([C@@H]1NC2=O)[C@@H](C(=O)N4c1c3cccc1)C)O                                        | -8.8 | <i>Aspergillus versicolor</i> LZD-14-1             |
| 47 | M47 | C1(=O)OC(C2=C[C@@H]3[C@]4([C@H]([C@@]5(C2=C1)CO5)C[C@@]1([C@@H]2C4=C(CO[C@@H]2OC1=O)(C)C)O3)C)C(C)C                            | -8.8 | <i>Talaromyces amestolkiae</i> YX1                 |
| 48 | M48 | C1[C@H]2[C@@](O[C@]31c1cccc1CC3=O)(C(C)(C(=O)C1=Nc3cccc3C(=O)[N+]2)1)C)O                                                       | -8.8 | <i>Neosartorya fischeri</i>                        |
| 49 | M49 | C1CC[C@H]2[C@@H](C1)[NH2+][C@H]2[C@@]12[C@@H]3[C@@H](CCCC3)N[C@@H]1N1[C@]3(C2)C(=O)N([C@@](C1=O)(CO)SS3)C                      | -8.8 | <i>Acrostalagmus luteoalbus</i> SCSIO F457         |
| 50 | M50 | O=C1N2[C@@H](CCC2)C(=O)N[C@H]1C[C@@H]1[C@H]([NH2+][C@@H]2[C@@H]1CCCC2)CC=C(C)C                                                 | -8.7 | <i>Penicillium</i> sp.                             |
| 51 | M51 | N1c2c(C(=C)N[C@H](C(=O)N3[C@H](C(=O)Nc4c(C(=O)N([C@H](C1=O)C)C)ccc4)CCC3)C)cccc2                                               | -8.7 | <i>Aspergillus versicolor</i> LZD-14-1             |
| 52 | M52 | c1ccc2c(c1)[nH+]c1c2cc([nH]c1C(=O)C)C(=O)NCCc1ccc(cc1)O                                                                        | -8.7 | <i>Marinactinospora thermotolerans</i> SCSIO 00652 |
| 53 | M53 | c1cc(c2c(c1)C(=O)c1c(C2=O)c(c2c(c1O)c1c(C[C@H]2O)cc2c(c1O)C(=O)O[C@@](C2)(O)C)OC)O                                             | -8.7 | <i>Streptosporangium</i> sp.                       |
| 54 | M54 | c1cc(c2c(c1)C(=O)c1c(C2=O)c(c2c(c1O)c1c(C[C@H]2O)cc2c(c1O)C(=O)O[C@@](C2)(OC)C)OC)O                                            | -8.7 | <i>Streptosporangium</i> sp.                       |
| 55 | M55 | C1[C@H](OC(=O)C[C@H](OC(=O)c2c(cc(cc2O)O)C[C@H](OC(=O)C[C@@H](C)OC(=O)c2c(cc(cc2O)O)CC1=O)C)C)C                                | -8.7 | <i>Hansfordia sinuosae</i>                         |
| 56 | M56 | Cc1cc(c2c(c1)[OH+][C1=C([C@@H]3[C@@H]4[C@H](C1)[C@](C(=O)OCC)(O)O[C@@]4(C1=C3[OH+])c3cc(C)cc(c3C1=O)O)C(=O)OC)C2=O)O           | -8.7 | <i>Penicillium purpurogenum</i> G59                |
| 57 | M57 | c1ccc2c(c1)[nH+]c1c2cc([nH]c1C(=O)C)C(=O)NCCc1ccc(cc1)OC                                                                       | -8.6 | <i>Streptomyces</i> sp. CMN-62                     |
| 58 | M58 | c1ccc2c(c1)[nH+]c1c2cc([nH]c1C(=O)C)C(=O)NCCc1cccc1                                                                            | -8.6 | <i>Marinactinospora thermotolerans</i> SCSIO 00652 |
| 59 | M59 | C1C[C@@H]([C@H]2[C@H]3[C@@H]1N[C@H](C(=O)N[C@@H](C[C@H]3C[NH2+])2)CC[C@H]1O[C@H]([C@@H]([C@H]([C@@H]1O)O)O)CO)C(CC)(C)C(C)C=C  | -8.6 | <i>Marinactinospora thermotolerans</i> SCSIO 00652 |
| 60 | M60 | c1ccc2c(c1)N=C1[N+](C2=O)[C@H](C(=O)NC1)C[C@@]1(c2c(ccc2)N2[C@H]1N[C@H](C2=O)C)O                                               | -8.6 | <i>Aspergillus versicolor</i> LZD-14-1             |
| 61 | M61 | [C@@H]1(C[C@@H]([C@@H]2[C@@H](C1)[C@@H]([C@@H]([NH2+])2)C(C)(C)C=C)C[C@H]1C(=O)N[C@H](C(=O)N1)C)C/C=C(\)/CO)CC=C(C)C           | -8.6 | <i>Eurotium cristatum</i>                          |
| 62 | M62 | C1=C[C@H]2[C@H](OC1(C)C)C[C@@H]1[C@@H](C2)[C@@H]2[C@@]34[C@@H](C[C@]5(N(C3=O)CCC5)C(=O)N4)C([C@H]2[NH2+])1(C)C                 | -8.6 | <i>Aspergillus versicolor</i>                      |
| 63 | M63 | c1cccc(c1O)C1=N[C@@H](CO1)[C@@H]1SC[C@@H](N1C)CN1[C@@H]2C(=O)N([C@H](C1=O)CSSC2)C[C@@H]1N([C@H](SC1)[C@H]1N=C(OC1)c1c(O)ccc1)C | -8.6 | <i>Streptomyces olivaceus</i>                      |



|     |      |                                                                                                                                       |      |                                               |
|-----|------|---------------------------------------------------------------------------------------------------------------------------------------|------|-----------------------------------------------|
| 80  | M80  | C1=C[C@H]2[C@H](OC1(C)C)C[C@H]1[C@@H](C2)[C@H]([C@H]([NH2+])C(C)(C=C)C)C[C@H]1C(=O)N2[C@@H](C(=O)N1)CCC2                              | -8.4 | <i>Aspergillus versicolor</i>                 |
| 81  | M81  | [C@@H]1(CC[C@H]2[C@H](C1)[C@H]([C@@]1(C=C2C)C(=O)C2=C(O1)C=C([NH+])C2=O)c1ccc(cc1)O)/C=C/C)C                                          | -8.4 | <i>Campylocarpon</i> sp. HDN13-307            |
| 82  | M82  | C1[C@H]2[C@H]3[C@@]4(C(=O)N2)[C@H](C=C([C@]3([C@@H]2[C@H]1[C@@H]1[C@H]([NH2+])CCCC1)C)/C=C/C[C@H](C)/C=C/(C(=O)C(=O)CCC4=O)\C         | -8.4 | <i>Penicillium chrysogenum</i> V11            |
| 83  | M83  | O1C(=O)CC[C@]2([C@](C1(C)C)([C@@H](C[C@]1([C@@H]2Cc2c(O1)c(c1c(c2OC)C(=O)OC1)C)O)O)C                                                  | -8.4 | <i>Aspergillus aureolatus</i> HDN14-107       |
| 84  | M84  | C1CC(=O)C=C2[C@]1([C@@H]1C(=C3[C@](CC1)([C@H](CC3)[C@H])/C=C/C(=C)C(C)C)C)C=C2)C                                                      | -8.4 | <i>Aspergillus</i> sp.                        |
| 85  | M85  | c1cc(c2c(c1)C(=O)c1c(C2=O)c(c2c(c1O)c1c(C[C@H]2OC(=O)C(C)C)cc2c(c1O)C(=O)O[C@H](C2)C)OC)O                                             | -8.4 | <i>Streptosporangium</i> sp.                  |
| 86  | M86  | c1cc(c2c(c1)C(=O)c1c(C2=O)c(c2c(c1O)c1c(C[C@H]2OC(=O)CC)cc2c(c1O)C(=O)O[C@H](C2)C)OC)O                                                | -8.4 | <i>Streptosporangium</i> sp.                  |
| 87  | M87  | c12c(c(ccc1O)[C@@H]1CCC(=O)c3c1cccc3O)C(=O)[C@](C2=O)(CC(=O)C)O                                                                       | -8.4 | <i>Cladosporium cladosporioides</i> HDN14-342 |
| 88  | M88  | N1C(=O)[C@@H](N(C(=O)[C@@H](NC(=O)[C@@H]2N(C(=O)[C@@H](OC(=O)[C@@H](N(C(=O)[C@@H]1Cc1ccc(cc1)OCCC(=C)C)C)Cc1cccc1)CCC2)C)C)[C@H](CC)C | -8.4 | <i>Bionectria ochroleuca</i>                  |
| 89  | M89  | C[C@H]1C/C=C/[C@H]2[C@H]3[C@@](C)([C@@H](C)[C@H]4[C@H](Cc5cccc5)N=C([C@@]24C(=O)/C=C/C(=O)[C@@H](/C(=C/1)/O)OC(=O)C)O)O3              | -8.4 | <i>Jishengella endophytica</i> 161111         |
| 90  | M90  | Cc1cc(cc(c1C(=O)c1c2c3cc(cc(c3c(=O)c3c(cc(C)c(c23)[oH+])c1=O)O)O)O)O                                                                  | -8.4 | <i>Aspergillus glaucus</i>                    |
| 91  | M91  | N1C(=O)[C@@]2(c3cc(c4c(c13)C=CC(O4)(C)C)C)C([C@H]1[C@]3(C(=O)N4CC C[C@]4(C1)C(=O)N3)[C@H]2O)(C)C                                      | -8.4 | <i>Aspergillus westerdijkiae</i> DFFSCS013    |
| 92  | M92  | c1c(c(ccc1)O)/C=C/1\NC(=O)[C@@]2(NC1=O)Cc1c(O2)cccc1                                                                                  | -8.4 | <i>Hansfordia sinuosae</i>                    |
| 93  | M93  | c1ccc2c3c1O[C@]14c5c(C(=O)[C@@H]6[C@H]1O6)c(ccc5O[C@]3([C@@H](CC2=O)O)O4)O                                                            | -8.4 | <i>Lasiodiplodia theobromae</i> ZJ-HQ1        |
| 94  | M94  | c1cc(c2c3c1c1c4c(c3C=CC2=O)[C@H]([C@H](Oc4c(cc1)O)C(=O)O)O)O                                                                          | -8.4 | <i>Alternaria</i> sp.                         |
| 95  | M95  | c1cc(c2c3c1c1c4c(c3C=CC2=O)[C@](Oc4c(cc1)O)(C(=O)O)O)O                                                                                | -8.4 | <i>Alternaria</i> sp.                         |
| 96  | M96  | Cc1cc(cc(c1C(=O)c1c2c3cc(cc(c3c(=O)c3c(cc(C)c(c23)[oH+])c1=O)O)O)O)O                                                                  | -8.4 | <i>Aspergillus glaucus</i>                    |
| 97  | M97  | C[C@H]1C(=O)N2[C@@H]3N1[C@H]1C4=Nc5cccc5C(=O)[N+]4[C@@H](C[C@@]3(c3cccc23)O)C(=O)N1                                                   | -8.4 | <i>Aspergillus versicolor</i> MST-MF495       |
| 98  | M98  | c1(ccc(cc1)C[C@@H](C(=O)N[C@H](C(=O)N[C@@H](C(=O)O)C(C)C)C[C@H]1[C@@H]2[C@H]([NH2+])C1)CCCC2)N)O                                      | -8.3 | <i>Aspergillus</i> sp. SCSIO 41501            |
| 99  | M99  | c1ccc2c(c1)c1c([nH+]2)c([nH](c1)C(=O)O)c1cc(oc1)CO                                                                                    | -8.3 | <i>Jishengella endophytica</i> 161111         |
| 100 | M100 | c1ccc2c(c1)N=C1[N+](C2=O)[C@H]2C[C@]3([C@@H]4N([C@@H]1NC2=O)[C@H](C(=O)N4c1c3cccc1)CO)O                                               | -8.3 | <i>Aspergillus versicolor</i> LZD-14-1        |

|     |      |                                                                                                                                                             |      |                                                  |
|-----|------|-------------------------------------------------------------------------------------------------------------------------------------------------------------|------|--------------------------------------------------|
| 101 | M101 | [C@@H]1(CC[C@H]2[C@H](C1)[C@H]([C@]1(C=C2)C(=O)C2=C(O)C=C[NH+]<br>+)]C2=O)c1ccc(cc1)O)/C=C/C                                                                | -8.3 | <i>Campylocarpon</i> sp. HDN13-307               |
| 102 | M102 | [C@@H]1(CC[C@H]2[C@H](C1)[C@H]([C@H]1[C@H]([C@]2(C)O)OC2=C(C<br>1=O)C(=O)[NH+])C=C2c1ccc(cc1)O)/C=C/C                                                       | -8.3 | <i>Campylocarpon</i> sp. HDN13-307               |
| 103 | M103 | c12c(c(ccc1O)[C@@H]1CCC(=O)c3c1cccc3O)C(=O)[C@H]([C@@H]([C@@H]2<br>OC)O)Cl                                                                                  | -8.3 | <i>Cladosporium cladosporioides</i><br>HDN14-342 |
| 104 | M104 | c12c(cc(cc1[OH+]C1=C(C2=O)[C@]2([C@H]3[C@@H]1C1=C(C[C@H]3[C@@]<br>O2)(C(=O)OC)O)[OH+]c2c(C1=O)c(cc(c2)C)O)C(=O)OC)C)O                                       | -8.3 | <i>Penicillium</i> sp. ZJ-SY2                    |
| 105 | M105 | [C@@]123[C@H]([C@@]4(c5cccc5N[C@@H]4N1C(=O)[C@](SS2)(N(C3=O)C<br>)[C@H](C)O)[C@]12[C@@H]([C@]34N([C@H]2Nc2c1cccc2)C(=O)[C@](SS3)(<br>N(C4=O)C)[C@H](C)O)O)O | -8.3 | <i>Bionectria ochroleuca</i>                     |
| 106 | M106 | [C@@H]12C[C@H]3[C@@H]4CC[C@H](C[C@@H]4[NH2+][C@@H]3[C@<br>@H)(N1C(=O)[C@@H]1CCCC1C2=O)C=C(C)C)OC                                                            | -8.3 | <i>Aspergillus</i> sp. BRF 030                   |
| 107 | M107 | C1[C@@H](C[C@]2([C@](C1)([C@]1([C@@H](CC2=O)[C@@H]2[C@](CC1)<br>([C@H](CC2)[C@@H](/C=C/[C@@H](C(C)C)C)C)O)C)O)O                                             | -8.3 | <i>Aspergillus versicolor</i> ZBY-3              |
| 108 | M108 | c1ccc2c3c1O[C@]14c5c(C(=O)[C@H]([C@H]1O)Cl)c(ccc5O[C@]3([C@@H](C<br>C2=O)OC)O4)O                                                                            | -8.3 | <i>Lasiodiplodia theobromae</i> ZJ-<br>HQ1       |
| 109 | M109 | c1ccc2c3c1O[C@]14c5c(C(=O)[C@@H]6[C@H]1O6)c(ccc5O[C@]3(CCC2=O)O<br>4)O                                                                                      | -8.3 | <i>Lasiodiplodia theobromae</i> ZJ-<br>HQ1       |
| 110 | M110 | c1ccc2c3c1O[C@]14c5c(C(=O)[C@@H]6[C@H]1O6)c(ccc5O[C@]3(C=CC2=O)<br>O4)O                                                                                     | -8.3 | <i>Lasiodiplodia theobromae</i> ZJ-<br>HQ1       |
| 111 | M111 | [C@@H]1(CC[C@@H]2[C@H](C1)[C@H](C[NH2+])2)[C@@H]1[C@H]([C@H]<br>)([NH2+]C1)C(=O)OC[C@@H]1[C@@H]2[C@H]([NH2+]C1)CC[C@@H](C2)Cl<br>)Cl                        | -8.3 | <i>Marine actinomycete</i> NPS12745              |
| 112 | M112 | N1([C@H](C(=O)Nc2c(C(=O)N3[C@H](C(=O)Nc4c(C(=O)N[C@H](C1=O)C)cccc<br>4)CCC3)cccc2)C)C                                                                       | -8.2 | <i>Aspergillus versicolor</i> LZD-14-1           |
| 113 | M113 | C1(=O)C[C@H]([C@@H]2[C@@]34C(=C(C(=O)CC[C@@H]1C)C(=O)O3)O[C@<br>@]([C@H](C4)C)([C@H]2O)C)[C@@H]1C(=O)C(=C(O1)O)C                                            | -8.2 | <i>Streptomyces koyangensis</i> SCSIO<br>5802    |
| 114 | M114 | C1CC[C@@H]2[C@H](C1)[C@@H]([C@H]([NH2+])2)C(C)(C=C)C)/C=C\1/[NH+]<br>C(=O)/C=C/C)/[NH+]C1=O                                                                 | -8.2 | <i>Eurotium</i> sp. SCSIO F452                   |
| 115 | M115 | C1=Cc2c(OC1(C)C)cc1c(c2)[C@](C(=O)N1)(C[C@H]1C(=O)N2[C@H](C(=O)N1)<br>CCC2)C(C)C)C=C                                                                        | -8.2 | <i>Aspergillus versicolor</i>                    |
| 116 | M116 | c12cccc3c1[C@@](C(=O)N2)([C@H]1[C@@H](C3)CNC1=O)O                                                                                                           | -8.2 | <i>Penicillium commune</i><br>DFSCS026           |
| 117 | M117 | C1([C@@H](CC[C@]2([C@@H]1CC[C@@]1([C@@H]2Cc2c(O1)c(c1c(c2O)C(<br>=O)OC1)C)C)O)(C)C                                                                          | -8.2 | <i>Aspergillus aureolatus</i> HDN14-<br>107      |
| 118 | M118 | [C@@H]1(C([C@H]2[C@](CC1)([C@@]1([C@@H](CC2)C)Oc2c(C1)c(cc1c2CN<br>(C1=O)CCCC(=O)OC)O)C)C)O                                                                 | -8.2 | <i>Stachybotrys chartarum</i> 952                |



|     |      |                                                                                                                                                                                                           |      |                                               |
|-----|------|-----------------------------------------------------------------------------------------------------------------------------------------------------------------------------------------------------------|------|-----------------------------------------------|
| 119 | M119 | <chem>C1(=C([C@H](OC1=O)O)c1ccc(cc1)O)Cc1ccc2c(c1)CCC(O2)(C)C</chem>                                                                                                                                      | -8.2 | <i>Aspergillus terreus</i>                    |
| 120 | M120 | <chem>N12C(=O)[C@H](OC(=O)[C@@H](N(C(=O)[C@@H](NC(=O)[C@@H](N(C(=O)[C@@H](NC(=O)[C@@H]1CCC2)CO)C)C)C)Cc1ccc(cc1)OCC=C(C)C)C)Cc1ccc1</chem>                                                                | -8.2 | <i>Bionectria ochroleuca</i>                  |
| 121 | M121 | <chem>CC[C@@H](C)[C@@H]1C(=O)N(C)[C@H]([C@H](c2ccccc2)O)/C(=N/c2ccccc2/C(=N/[C@H](C)/C(=N/1)/O)/O</chem>                                                                                                  | -8.2 | <i>Aspergillus terreus</i> SCSGAF0162         |
| 122 | M122 | <chem>C[C@]1(c2cccc(c2C(=C2[C@@H]1C[C@H]1[C@@H](C(=O)C(=[C@]1(C2=O)O)O)C(=N)O)N(C)C)O)O</chem>                                                                                                            | -8.2 | <i>Streptomyces</i> BL 567201                 |
| 123 | M123 | <chem>C1C2=C[C@@H]([C@@H]3[C@@H]([C@]2(CC[C@@H]1O)C)CC[C@]1([C@H]3CC[C@H]1[C@@H]/C=C/[C@H](C)C)C)C)O</chem>                                                                                               | -8.1 | <i>Aspergillus</i> sp.                        |
| 124 | M124 | <chem>[C@H]1(C(=O)NCC(=O)N([C@H](C(=O)N[C@H](C(=O)N1C)C)c1ccccc1)C)Cc1ccc1</chem>                                                                                                                         | -8.1 | <i>Aspergillus versicolor</i> LZD-14-1        |
| 125 | M125 | <chem>c1(ccccc1)C[C@@H](N(C(=O)[C@@H](N)[C@@H](CC)C)C(=O)N[C@H](C(=O)Nc1ccccc1C(=O)O)C)C</chem>                                                                                                           | -8.1 | <i>Simplicillium obclavatum</i> EIODSF 020    |
| 126 | M126 | <chem>N1[C@H](C2=Nc3c(C(=O)[N+]2[C@@H]2[C@@H](C1=O)C=CC=C2)cccc3)CCC(=O)N</chem>                                                                                                                          | -8.1 | <i>Penicillium aurantiogriseum</i>            |
| 127 | M127 | <chem>c1ccc2c(c1)[C@@]1(C(=N2)C([C@@H]2[C@@]3(C1)CN1[C@@](C2)(O[NH2+]3)CCC1)C)C)O</chem>                                                                                                                  | -8.1 | <i>Penicillium purpurogenum</i> G59           |
| 128 | M128 | <chem>c1ccc2c(c1)[C@@]13C(=N2)C([C@H]2[C@](C1)([C@@H](N1[C@H](C2)CCC1)C#N)NC(=O)O3)C)C</chem>                                                                                                             | -8.1 | <i>Aspergillus versicolor</i>                 |
| 129 | M129 | <chem>C(C[C@@H](CCCCC/C=C/C(=O)N[C@@H]1[C@H]O[C@@H]([C@@H]([C@@H]1O)O)C[C@@H](O)[C@@H]1[C@@H]([C@@H]([C@@H](O1)[N+]1C(=O)[NH+]C(=O)C=C1)O)O)O[C@@H]1O[C@H]([C@@H]([C@@H]([C@@H]1NC(=O)C)O)O)CO)C)C</chem> | -8.1 | <i>Streptomyces xinghaiensis</i> SCSIO S15077 |
| 130 | M130 | <chem>C[C@@H]1C2=Nc3c(cccc3O)C(=O)[N+]2c2ccccc2C(=O)N1</chem>                                                                                                                                             | -8.1 | <i>Aspergillus westerdijkiae</i> SCSIO 05233  |
| 131 | M131 | <chem>CC(C)C[C@@H](c1ccc2c(c1OC)C(=O)OCc1cc(C)cc(c1O2)O)O</chem>                                                                                                                                          | -8.1 | <i>Penicillium</i> sp. ZLN29                  |
| 132 | M132 | <chem>C1CC[C@H]2[C@H](C1)[C@H](C(N@H+)2C)C(=O)N1CCN(CC1)[C@@H]1[C@H](CCCC1)OC</chem>                                                                                                                      | -8.1 | <i>Aspergillus sydowii</i> SCSIO 00305        |
| 133 | M133 | <chem>COc1ccc2C=C(C(=O)[OH+]c2c1OC)NC(=O)C1=NO[C@H]2[C@@H](C=C[C@H]([C@]2(C1)O)Cl)O</chem>                                                                                                                | -8.1 | <i>Trichoderma virens</i>                     |
| 134 | M134 | <chem>C1(=C)C[C@@H]2[C@H]([C@H]3[C@@H]1C[C@@H]3C(O)(C)C)[C@H]1[C@@H](CC2)[NH2+][C@@H]2[C@H]1[C@H]([C@H]1[C@]2([C@@]2([C@@](CC1)([C@]13[C@H](CC2)O[C@@H]([C@@H]([C@H]1O3)O)C(=C)O)C)C)OC</chem>            | -8.1 | <i>Mucor irregularis</i> QEN-189              |
| 135 | M135 | <chem>CC[C@H](C)C(=O)O[C@H]1CCC=C2C=C[C@H](C)[C@H](CC[C@@H]3C[C@H](CC(=O)O3)O)[C@@H]12</chem>                                                                                                             | -8.1 | <i>Penicillium solitum</i>                    |
| 136 | M136 | <chem>c1(ccccc1)C[C@H]1N(C(=O)[C@@H](OC(=O)[C@@H](NC(=O)[C@@H](OC(=O)[C@@H](N(C(=O)[C@H](NC1=O)C)C)C)C)O)C)CC(C)C)C</chem>                                                                                | -8.1 | <i>Spicellum roseum</i>                       |

|     |             |                                                                                                                                                            |      |                                               |
|-----|-------------|------------------------------------------------------------------------------------------------------------------------------------------------------------|------|-----------------------------------------------|
| 137 | <b>M137</b> | <chem>COc1ccc2c(c1)[nH]c1c2[C@@H]([C@@]2(N([C@H]1C=C(C)C(=O)[C@@H]1CCCN1C2=O)O)O)</chem>                                                                   | -8   | <i>Aspergillus</i> sp.                        |
| 138 | <b>M138</b> | <chem>c1(ccc(cc1)O)C[C@@H](C(=O)N[C@H](C(=O)N[C@@H](C(=O)N[C@@H](C(=O)O)C(C)C(C)C)N</chem>                                                                 | -8   | <i>Aspergillus</i> sp.                        |
| 139 | <b>M139</b> | <chem>c1(ccccc1)C[C@H](N(C(=O)[C@@H](N)C(C)C)C(=O)N[C@H](C(=O)Nc1cccc1C(=O)O)CC(C)C</chem>                                                                 | -8   | <i>Simplicillium obclavatum</i> EIODSF 020    |
| 140 | <b>M140</b> | <chem>c1cc(ccc1)C[C@@H]1NC(=O)CN(C(=O)[C@H]2N(C(=O)[C@H](N(C(=O)[C@@H](NC(=O)[C@@H](NC(=O)[C@@H](N(C1=O)C)Cc1ccc(cc1)O)C(C)C)CC(C)C)Cc1cccc1)CCC2)C</chem> | -8   | <i>Acremonium persicinum</i> SCSIO115         |
| 141 | <b>M141</b> | <chem>c1ccc2c(c1)c1c([nH+])c([nH]cc1)c1cc(oc1)CO</chem>                                                                                                    | -8   | <i>Jishengella endophytica</i> 161111         |
| 142 | <b>M142</b> | <chem>c1ccc(c(c1)C(=O)OC)[N+]1C(=Nc2c(C1=O)cccc2)[C@@H]1CCC(=[NH2])N1</chem>                                                                               | -8   | <i>Penicillium aurantiogriseum</i>            |
| 143 | <b>M143</b> | <chem>C1[C@@H](C[C@H]2[C@@H](C1)[C@H]([C@H]([NH2+])2)C(C)(C)C=C)C[C@@H]1C(=O)N[C@@](C(=O)N1)(C)OC)CC=C(C)C</chem>                                          | -8   | <i>Eurotium cristatum</i>                     |
| 144 | <b>M144</b> | <chem>O1[C@@H](CC(=O)O[C@@H](CC(=O)Cc2c(C1=O)c(cc(c2)O)O)C)C</chem>                                                                                        | -8   | <i>Hansfordia sinuosae</i>                    |
| 145 | <b>M145</b> | <chem>c12c(c(ccc1O)[C@@H]1CCC(=O)c3c1cccc3O)C(=O)CC[C@@H]2OC</chem>                                                                                        | -8   | <i>Cladosporium cladosporioides</i> HDN14-342 |
| 146 | <b>M146</b> | <chem>c1c(cc2c(c1O)C(=O)c1c(C2=O)cc(cc1O)O)C[C@H](O)C</chem>                                                                                               | -8   | <i>Penicillium</i> sp. SCSGAF 0023            |
| 147 | <b>M147</b> | <chem>c1ccc2c(c1O)C(=O)c1c(C2=O)cc(c(c1O)[C@@H](CCO)CO)O</chem>                                                                                            | -8   | <i>Aspergillus</i> sp. F40                    |
| 148 | <b>M148</b> | <chem>c1cc(c2c(c1)[OH+])c1c(C2=O)c(cc2c1[C@]1([C@@](O2)(O[C@@H](C1)OC)C)OC)O</chem>                                                                        | -8   | <i>Aspergillus</i> sp. F40                    |
| 149 | <b>M149</b> | <chem>C1C[C@](c2c(C1)c1c(c(c2)O)[C@@H]2[C@](CC1)([C@@H](CO2)O)C)(C)CO</chem>                                                                               | -8   | <i>Aspergillus wentii</i> SD-310              |
| 150 | <b>M150</b> | <chem>C1C[C@](c2c(C1)c1c(c(c2)O)[C@@H]2[C@](CC1)([C@@H](CO2)O)C)(C)CO</chem>                                                                               | -8   | <i>Aspergillus wentii</i> SD-310              |
| 151 | <b>M151</b> | <chem>C[C@H]1C[C@H]2[C@H](C)Oc3c(cnc(c3[C@@H]2[C@@H](C)[C@@H]1O)O)c1ccc(cc1)O</chem>                                                                       | -8   | <i>Chaunopycnis</i> sp. CMBMF028              |
| 152 | <b>M152</b> | <chem>N1C(=O)[C@@]2(c3ccc4c(c13)C=CC(O4)(C)C([C@H]1[C@]3(C(=O)N4CCC[C@]4(C1)C(=O)N3)[C@@H]2O)(C)C</chem>                                                   | -8   | <i>Aspergillus westerdijkiae</i> DFFSCS013    |
| 153 | <b>M153</b> | <chem>c1ccc2c(c1)C1=C(C2)[C@]2([C@H](C1)CC[C@@H]1[C@@]2(CC[C@H]2C1=C[C@H]([C@H](C2)C(C)(C)O)O)C)C</chem>                                                   | -8   | <i>Mucor irregularis</i> QEN-189              |
| 154 | <b>M154</b> | <chem>C[C@@H]1CCC/C=C\C[C@@H]2CCC[C@H]2[C@H]//C=C\C(=O)O1)O</chem>                                                                                         | -8   | <i>Penicillium</i> sp. PSU-F44                |
| 155 | <b>M155</b> | <chem>O=c1c2cccc2ncn1[C@H]1C(=O)N([C@@H]2[C@@](C1)(O)c1cccc1N2)[C@H](C)C(=O)OC</chem>                                                                      | -8   | <i>Penicillium</i> sp.                        |
| 156 | <b>M156</b> | <chem>c12c(cccc1)c(c[nH]2)C[C@H]1C(=O)N2[C@H](C(=O)N1)CCC2</chem>                                                                                          | -7.9 | <i>Aspergillus</i> sp.                        |
| 157 | <b>M157</b> | <chem>C1C[C@@H]2[C@H](CC1)[C@@H](C(NH2+))2[C@]1([C@@H]2CCCC[C@H]2NC1=O)OC</chem>                                                                           | -7.9 | <i>Shewanella piezotolerans</i>               |
| 158 | <b>M158</b> | <chem>c1ccc2c(c1)N=C1[N+](C2=O)[C@H](C(=O)NC1)C[C@]12c3c(cccc3)N3[C@H]1N(C1(C3=O)CC1)CO2</chem>                                                            | -7.9 | <i>Aspergillus versicolor</i> LZD-14-1        |

|     |      |                                                                                                                                                         |      |                                              |
|-----|------|---------------------------------------------------------------------------------------------------------------------------------------------------------|------|----------------------------------------------|
| 159 | M159 | [C@H]1([C@]23N([C@@H]4[C@]1(c1c(N4)cccc1)[C@@]14c5c(N[C@@H]1N1[C@]6([C@H]4O)C(=O)N([C@@](C1=O)(CO)[S@@]6=S=S)C)cccc5)C(=O)[C@@](N(C2=O)C)(C)[S@]3=S=S)O | -7.9 | <i>Acrostalagmus luteoalbus</i><br>HDN13-530 |
| 160 | M160 | C1CC[C@H]2[C@@H](C1)[C@H](C[N@H+]2C/C=C(\C)/CO)C[C@H]1C(=O)N[C@@H](C(=O)N1)C                                                                            | -7.9 | <i>Eurotium cristatum</i>                    |
| 161 | M161 | c12cccc3c1[C@@]1(C(=O)N2C)[C@H]2[C@@H](C3)C(N3[C@]2([C@](O1)([C@@](C3=O)([C@H](C)O)O)O)(C)C                                                             | -7.9 | <i>Penicillium commune</i><br>DFSCS026       |
| 162 | M162 | C1CC[C@H]2[C@@H](C1)[C@H]1[C@H]([NH2+]2)C([C@@H]2[C@]3(C1)CN1[C@@](C2)(O[NH2+]3)CCC1)(C)C                                                               | -7.9 | <i>Penicillium purpurogenum</i> G59          |
| 163 | M163 | [C@H]1([C@H]([C@H]([C@@H]([C@H]2[C@@]1C=C([C@H]([C@@H]2/C=C(/C(=O)O)\C)/C=C/C[C@@H](C[C@H]([C@@H]([C@H](C(C)O)C)O)O)/C)C)C)O)O                          | -7.9 | <i>Streptomyces</i> sp. SCSGAA 0027          |
| 164 | M164 | [C@H]1(CC[C@@H]([C@H]2[C@@]1C=C([C@H]([C@@H]2/C=C(/C(=O)O)\C)/C=C/C[C@@H](C[C@H]([C@@H]([C@H](C(C)O)C)O)O)/C)C)C)O                                      | -7.9 | <i>Streptomyces</i> sp. SCSGAA 0027          |
| 165 | M165 | c1(c(cc2c(c1C)c(c1c(c2)[C@@H](OC1=O)[C@]1([C@@H](C(=CC(=O)[C@@H]1OC)OC)O)O)OC)C(=O)OC                                                                   | -7.9 | <i>Saccharothrix</i> sp. 10-10               |
| 166 | M166 | C1(=C([C@H](OC1=O)OC)c1ccc(cc1)O)Cc1ccc(c(c1)CC=C(C)C)O                                                                                                 | -7.9 | <i>Aspergillus terreus</i>                   |
| 167 | M167 | c1cc(c2c(c1)C(=O)c1c(C2=O)c(c2c(c1O)c1c(C[C@H]2O)cc(c(c1O)C(=O)O)CC(=O)C)OC)O                                                                           | -7.9 | <i>Streptosporangium</i> sp.                 |
| 168 | M168 | c1c(cc2c(c1O)[OH+]C(=CC2=O)c1c(c(cc(c1)O)O)O)O                                                                                                          | -7.9 | <i>Penicillium</i> sp. SCSGAF 0023           |
| 169 | M169 | C1(=O)[C@@]([C@@H]([C@@H]2C(=C1)C=C(OC2)/C=C/[C@@]([C@H]([C@@H](CC)C)O)(O)C)O)O)C                                                                       | -7.9 | <i>Penicillium sclerotiorum</i> M-22         |
| 170 | M170 | C(=O)(c1ccc(cc1)[N](=O)O)[C@H]1[C@@H]2[C@@]([C@@]3(C(=C1)C(=O)O)C3)O)(CCC[C@]2(C)CO)C                                                                   | -7.9 | <i>Aspergillus ochraceus</i> Jcma1F17        |
| 171 | M171 | N1C(=O)[C@@H](NC(=O)/C/1=C/[C@@H]1[C@H]([NH2+][C@H]2[C@@H]1C)CCC2)C(C)(C=C)C                                                                            | -7.9 | <i>Microsporum</i> sp. MFS-YL                |
| 172 | M172 | c1ccc2c3c1O[C@]14c5c([C@H]([C@@H]6[C@H]1O6)O)c(ccc5O[C@]3(C=CC2=O)O4)O                                                                                  | -7.9 | <i>Lasiodiplodia theobromae</i> ZJ-HQ1       |
| 173 | M173 | C1[C@@H](C(c2c(C1)c1c(c(c2)O)[C@@H]2[C@](CC1)([C@@H](CO2)O)C)(C)C)O                                                                                     | -7.9 | <i>Aspergillus wentii</i> SD-310             |
| 174 | M174 | C1CC(c2c(C1)c1c(c(c2)O)[C@@H]2[C@](CC1)([C@@H](CO2)O)C)(C)C                                                                                             | -7.9 | <i>Aspergillus wentii</i> SD-310             |
| 175 | M175 | COc1cc2cc3CO(=O)c3c(c3ccc4c(c3)OCO4)c2cc1OC                                                                                                             | -7.9 | <i>Nocardia</i> sp. ALAA 2000                |
| 176 | M176 | CC(=C[C@H]1[C@]2(C=C3C(=O)N4CCC[C@H]4C(=O)N13)c1ccc(cc1N=C2O)OC)C                                                                                       | -7.9 | <i>Aspergillus sydowi</i> PFW1-13            |
| 177 | M177 | [C@@H]1(O)CC2=CC(=O)C3=C([C@]2(CC1)C)CC[C@]1([C@@H]3CC[C@@H]1[C@@H](/C=C/[C@@H](C(C)C)C)C)C                                                             | -7.8 | <i>Aspergillus</i> sp.                       |
| 178 | M178 | CC/C=C/[C@@H]([C@@H](C1=C(C(=O)[C@]2(O1)C(=O)N([C@]([C@@H]2O)(C(=O)c1cccc1)OC)C(=O)Cc1cccc1)O)O)O                                                       | -7.8 | <i>Aspergillus</i> sp.                       |

|     |      |                                                                                                                                                                                                                               |      |                                                  |
|-----|------|-------------------------------------------------------------------------------------------------------------------------------------------------------------------------------------------------------------------------------|------|--------------------------------------------------|
| 179 | M179 | C1(=O)[C@H](NC(=O)CC(=O)/C=C/C[C@H](OC(=O)[C@@H]2N1CCC2)CCC)Cc1cccc1                                                                                                                                                          | -7.8 | <i>Sarocladium kiliense</i> HDN11-112            |
| 180 | M180 | C1(=O)[C@H](N(C(=O)[C@@H](NC(=O)[C@@H](NC(=O)[C@H]2N(C(=O)[C@@H](N1)C(C)C)CCC2)Cc1ccc(cc1)OC)Cc1ccc(cc1)OC)C)Cc1ccc(cc1)O                                                                                                     | -7.8 | <i>Aspergillus</i> sp. SCSIO 41501               |
| 181 | M181 | c12cccc3c1c(c(=O)[nH+])2)c1c(c3)C(N(C1=O)C(=O)CC(=O)C)(C)C                                                                                                                                                                    | -7.8 | <i>Penicillium commune</i><br>DFFSCS026          |
| 182 | M182 | c12cccc3c1c(c(=O)[nH+])2)c1c(c3)C(NC1=O)(C)C                                                                                                                                                                                  | -7.8 | <i>Penicillium commune</i><br>DFFSCS026          |
| 183 | M183 | c1cc(ccc1C(=O)OC[C@@]1([C@H]2[C@](CCC1)([C@@]1([C@@H](C[C@H]2O)C(=O)OC1)O)C)C)[N](=O)O                                                                                                                                        | -7.8 | <i>Aspergillus ochraceus</i> Jcma1F17            |
| 184 | M184 | c1(c(cc2c(c1C)c(c1c2)[C@H](OC1=O)[C@]1([C@@H](C(=CC(=O)[C@@H]1O)OC)O)O)OC)C(=O)OC                                                                                                                                             | -7.8 | <i>Saccharothrix</i> sp. 10-10                   |
| 185 | M185 | [C@@H]1(CC[C@@H](O[C@@H]1C)O[C@H]1[C@](C[C@@H](O[C@@H]1C)O[C@H]1[C@@H]([C@H](O[C@H](C1)c1c(c2c(cc1)C(=O)C1=C(C2=O)[C@@H]([C@@H]([C@@]2([C@]1([C@H](C=C(C2)C)O[C@H]1O[C@H]([C@H]([C@@H](C1)OC)O)C)O)CC(=O)C)O)C)O)(O)C)OC(=O)N | -7.8 | <i>Streptomyces pratensis</i> NA-ZhouS1          |
| 186 | M186 | C1(=O)OC(C2=CC(=O)[C@]3([C@H]([C@@]4(C2=C1)CO4)C[C@@]1([C@@H]2[C@H]3C(=O)[C@H](O[C@@H]2OC1=O)C)C)C)(C)C                                                                                                                       | -7.8 | <i>Talaromyces amestolkiae</i> YX1               |
| 187 | M187 | c1c(cc(c1CCC(=O)/C=C/C)C(=O)O[C@@H](CC(=O)O[C@@H](Cc1c(c(cc1)O)O)C(=O)O[C@@H](CC(=O)O[C@@H](Cc1cc(cc1)O)O)C)C)C)O)O                                                                                                           | -7.8 | <i>Hansfordia sinuosae</i>                       |
| 188 | M188 | c12c(c(ccc1O)[C@@H]1CCC(=O)c3c1cccc3O)C(=O)[C@@](C2=O)(CC(=O)C)O                                                                                                                                                              | -7.8 | <i>Cladosporium cladosporioides</i><br>HDN14-342 |
| 189 | M189 | [C@@H]1([C@](C[C@H]2[C@]3(C([C@H](CC[C@]13C)Cl)(C)C)O2)(C)OCc1c(c2c([C@H](OC2=O)OC)c1O)C=O)OC)C(=O)O                                                                                                                          | -7.8 | <i>Acremonium strictum</i>                       |
| 190 | M190 | C12=CC(=O)OC(C1=C[C@@H]1[C@]3([C@H]([C@H]2C)C[C@@]2([C@@H]4[C@]3([C@@]([C@@H](O[C@@H]4OC2=O)C)(O1)O)C(=O)OC)C)C)(C)C                                                                                                          | -7.8 | <i>Penicillium</i> sp. 303                       |
| 191 | M191 | [C@]12([C@H]([C@H]3[C@@H]4CC[C@@H](C[C@@H]4[NH2+])[C@@H]3[C@@H](N1C(=O)[C@H]1CCCN1C2=O)C=C(C)C)OC)O)O                                                                                                                         | -7.8 | <i>Aspergillus</i> sp. BRF 030                   |
| 192 | M192 | CC(=CCc1ccc2c(c1OC)C(=O)OCc1cc(C)cc(c1O2)O)C                                                                                                                                                                                  | -7.8 | <i>Penicillium</i> sp. ZLN29                     |
| 193 | M193 | [C@@H]12[C@H]3CC[C@@H]([C@]3(CC[C@H]1[C@]1(CC[C@@H](C[C@]31O[C@H]3C2=O)O)C)C)[C@H](C)/C=C/[C@H](C)C)C                                                                                                                         | -7.8 | <i>Paecilomyces lilacinus</i> ZBY-1              |
| 194 | M194 | c1(cc(cc2C(=O)c3cc(cc(c3C=O)c12)O)C)OC)O                                                                                                                                                                                      | -7.8 | <i>Microsporium</i> sp. MFS-YL                   |
| 195 | M195 | [C@@H]12OC3=C(C(=O)[NH+])C=C3c3ccc(cc3)O)C(=O)[C@@H]1[C@@H]([C@@H]1C[C@H](CC[C@@H]1[C@]2(C)O)C)/C=C/C                                                                                                                         | -7.8 | <i>Campylocarpon</i> sp. HDN13-307               |
| 196 | M196 | c1(ccccc1O)C(=O)[C@@H]1[NH+][C@H]([C@H](C1)Cl)Cl)[C@@H]1[C@H]([C@H]([NH2+])[C@@H]1C(=O)[C@H]1CCCC[C@@H]1O)Cl)Cl                                                                                                               | -7.8 | <i>Actinomycete</i> strain CNQ-418               |
| 197 | M197 | CC(=CC(=O)[C@@H]1[C@H](C[C@H]2C(=O)N3CCC[C@H]3C(=N2)O)[C@@H]2CC[C@@H](C[C@@H]2[NH2+])1)OC)C                                                                                                                                   | -7.8 | <i>Aspergillus sydowi</i> PFW1-13                |

|     |      |                                                                                                                                                                                                                                                        |      |                                               |
|-----|------|--------------------------------------------------------------------------------------------------------------------------------------------------------------------------------------------------------------------------------------------------------|------|-----------------------------------------------|
| 198 | M198 | O=c1c2cccc2ncn1[C@H]1C(=O)N([C@@H]2[C@@](C1)(O)c1cccc1N2)[C@H](C)C(=O)O                                                                                                                                                                                | -7.8 | <i>Penicillium</i> sp.                        |
| 199 | M199 | O[C@@H]1CC2=CC=C3[C@H]4[C@@]([C@H](CC4)[C@H](C)/C=C/[C@@H](C)C)C)(CC[C@@H]3[C@]2(CC1)C)C                                                                                                                                                               | -7.7 | <i>Aspergillus</i> sp.                        |
| 200 | M200 | C[C@@H]1CCC/C=C/C=C/[C@@H](C[C@H]([C@@H]/C=C\C=C[C@H](C)/C=C/C=C\C(=O)O1)O)O)O                                                                                                                                                                         | -7.7 | <i>Bacillus amyloliquefaciens</i> SCSIO 00856 |
| 201 | M201 | C[C@@H]1[C@H](OC=C2C1=C(C(=C(C2=O)CC1=C(C(=C([OH+][C1=O])C)O)O)C)C                                                                                                                                                                                     | -7.7 | <i>Aspergillus</i> sp. 16-02-1                |
| 202 | M202 | [C@@H]12[C@H](CC(=O)[C@H](CCC1=O)C)[C@@H]1[C@@]3(OC2=O)C[C@@H]([C@]([C@H]1O)(C)OC3=O)C                                                                                                                                                                 | -7.7 | <i>Streptomyces koyangensis</i> SCSIO 5802    |
| 203 | M203 | c12c(cccc1)N=C([N+](C2=O)c1c(cccc1)C(=O)O)[C@H]1NC(=[NH2])CC1                                                                                                                                                                                          | -7.7 | <i>Penicillium aurantiogriseum</i>            |
| 204 | M204 | C[C@H]1/C=C/C(=O)O[C@H](C)[C@H](/C=C\C=C\C(=O)[C@](C)(C[C@H](C)[C@@H]1O[C@H]1[C@H]([C@H]([C@H](C)O1)OC)O)O)CO[C@H]1[C@@H]([C@@H]([C@H]([C@H](C)O1)O)OC)OC                                                                                              | -7.7 | <i>Streptomyces</i> sp. HK-2006-1             |
| 205 | M205 | c12cccc3c1[C@@]1(C(=O)N2C)[C@H]2[C@@H](C3)C(N3[C@]2([C@](O1)([C@](C3=O)(CC(=O)C)O)O)O)C)C                                                                                                                                                              | -7.7 | <i>Penicillium commune</i> DFFSCS026          |
| 206 | M206 | c1(c(cc2O[C@@]3([C@@H]([C@@H]4c2c1[C@@H]([C@H](O4)C)C)C(=O)/C=C\[C@@H](CCCCC)C)/O)/C(=O)N3C)O)C                                                                                                                                                        | -7.7 | <i>Penicillium citrinum</i>                   |
| 207 | M207 | c1ccc2c(c1)N=C([NH+][C2=O])[C@]([C@](C(=O)Nc1c(cccc1)C(=O)N)(C)O)(O)C                                                                                                                                                                                  | -7.7 | <i>Penicillium commune</i> 366606             |
| 208 | M208 | C1(=C[C@@H]2[C@]3(CC1)[C@@]1([C@]4([C@H](O2)C[C@H]1OC(=O)C/C=C/C(=O)C/C(=O)OC3)/C(=O)C)CO4)C)C                                                                                                                                                         | -7.7 | <i>Stachybotrys chartarum</i>                 |
| 209 | M209 | [C@]12([C@H]([C@H](C[C@H]1O)C)C)C[C@]1([C@H](C2)[C@H](CC[C@@H]2C3=C1C(=O)O[C@]3(C[C@@H]2)C)C)O)C                                                                                                                                                       | -7.7 | <i>Alternaria alternata</i> k21-1             |
| 210 | M210 | O1[C@]2(CC[C@]3([C@](C1(C)C)([C@@H](C[C@]1([C@@H]3Cc3c(O1)c1c1c(c3OC)C(=O)OC1)C)C(=O)OC)O2)C)O                                                                                                                                                         | -7.7 | <i>Aspergillus aureolatus</i> HDN14-107       |
| 211 | M211 | O1[C@H]([C@H]([C@H](C[C@@H]1O[C@@H]1C[C@@](O[C@@H]([C@H]1CC)C)([C@H]([C@@H]([C@@H]([C@@H]1[C@H](/C=C/C=C(=C)O[C@@H](C[C@H](/C=C/C=C(=O)O1)C)[C@H]([C@H]([C@@H]([C@]1(C[C@H]([C@@H]([C@H](O1)C)CC)O[C@H]1C[C@@H]([C@@H]([C@@H](O1)C)O)O)C)O)C)C)O)O)O)C | -7.7 | <i>Streptomyces</i> sp. 7-145                 |
| 212 | M212 | [C@@H]1(CC(=C2[C@]([C@H]1O)(Oc1c(C2=O)c(c(cc1)c1ccc2c(c1O)C(=O)C1=C[C@@H]([C@@H]([C@@]1(O2)C(=O)OC)O)C)O)C(=O)OC)O)C                                                                                                                                   | -7.7 | <i>Penicillium</i> sp. SCSGAF 0023            |
| 213 | M213 | C1[C@@H](C[C@@]23[C@](C1)([C@@]1(C(=C4[C@](CC1)([C@H](C[C@@H]4O)[C@@H](/C=C/[C@@H](C(C)C)C)C)C=C2)OO3)C)O                                                                                                                                              | -7.7 | <i>Aspergillus niger</i> MA-132               |
| 214 | M214 | C[C@@]1(Cc2c(C[C@H]1O)c1c1(=O)C=C(C(=O)c1c2O)OC)O)O                                                                                                                                                                                                    | -7.7 | <i>Nigrospora</i> sp. 1403                    |
| 215 | M215 | C(=O)([C@H](CC(C)C)NC(=O)[C@H](Cc1ccc(cc1)O)N(C)C(=O)[C@H]([C@@H](CC)C)NC(=O)C)OC                                                                                                                                                                      | -7.7 | <i>Simplicillium obclavatum</i> EIODSF 020e   |

|     |      |                                                                                                                                                                      |      |                                            |
|-----|------|----------------------------------------------------------------------------------------------------------------------------------------------------------------------|------|--------------------------------------------|
| 216 | M216 | c1cc(ccc1[N](=O)O)C(=O)OC[C@@]1([C@H]2[C@](CCC1)([C@@]1([C@@H](C[C@H]2O)C(=O)OC1O)C)C                                                                                | -7.7 | <i>Aspergillus ochraceus</i> Jcma1F17      |
| 217 | M217 | C[C@]1([C@@H](C[C@H]2[C@@H]([C@H]1O)C(=O)c1c(C2=O)c(cc(c1)OC)O)O)O                                                                                                   | -7.7 | <i>Stemphylium globuliferum</i>            |
| 218 | M218 | c1(ccccc1O)C(=O)[C@@H]1[N@H+](C@H)([C@H]([C@@H]1Br)Cl)Cl[C@@H]1[C@H]([C@H]([NH2+][C@@H]1C(=O)[C@H]1CCCC[C@@H]1O)Cl)Cl                                                | -7.7 | <i>Actinomycete strain</i> CNQ-418         |
| 219 | M219 | CC[C@H](C)C(=O)O[C@H]1C[C@@H](C)C=C2C=C[C@H](C)[C@H](CC[C@@H]3C[C@H](CC(=O)O3)O)[C@@H]12                                                                             | -7.7 | <i>Aspergillus terreus</i>                 |
| 220 | M220 | O1[C@@]2(Oc3cccc4c3c1ccc4O)[C@@H]1[C@@H]([C@@H](c3c2c(ccc3O)O)O)O1                                                                                                   | -7.7 | <i>Ascochyta sp.</i> NGB4                  |
| 221 | M221 | C/C=C/C=C/C(=O)O[C@@H]1C=C2COC(=O)[C@@]2([C@@]2(C)CCCC(C)C)[C@H]12)O                                                                                                 | -7.7 | <i>Aspergillus ustus</i>                   |
| 222 | M222 | C1(=O)N[C@@H](C(=O)N2[C@H]1CCC2)Cc1cccc1                                                                                                                             | -7.6 | <i>Aspergillus sp.</i>                     |
| 223 | M223 | [C@@H]1(O)C[C]23=C([C@H](O)C4=C([C@]2(CC1)C)CC[C@]1([C@@H]4CC[C@@H]1[C@@H]/C=C/[C@@H](C(C)C)C)C)O3                                                                   | -7.6 | <i>Aspergillus sp.</i>                     |
| 224 | M224 | O=C1N2[C@H]([C@]3(C=C2C(=O)N2[C@H]1CCC2)c1c(NC3=O)cc(OC)cc1)C=C(C)C                                                                                                  | -7.6 | <i>Aspergillus sp.</i>                     |
| 225 | M225 | c12c(cc(cc1[OH+]C1=C(C2=O)[C@]2([C@H]3[C@@H]1C1=C(C[C@@H]3[C@](O2)(C(=O)OC)O)[OH+]c2c(C1=O)c(cc(c2)C)O)C(=O)OC)C)O                                                   | -7.6 | <i>Penicillium sp.</i> ZJ-SY2              |
| 226 | M226 | C(=O)/C=C/[C@@H]1[C@@]23C(=C(C(=O)CC[C@H](C)O)C(=O)O2)O[C@@]([C@H](C3)C)([C@H]1O)C)O                                                                                 | -7.6 | <i>Streptomyces koyangensis</i> SCSIO 5802 |
| 227 | M227 | c1(c(cc2c(c1)nc1c(n2)C(=O)[NH+]C(=O)[NH+]1)C)C                                                                                                                       | -7.6 | <i>Jishengella endophytica</i> 161111      |
| 228 | M228 | C1C[C@H]2[C@@H](CC1)[C@@H](C[NH2+])2[C@@]1([C@H]2CCCC[C@@H]2NC1=O)OC                                                                                                 | -7.6 | <i>Shewanella piezotolerans</i>            |
| 229 | M229 | c1ccc2c(c1O)N=C1[N+](C2=O)[C@H](C(=O)NC1)C[C@H]1[C@H]2[C@@H](CC2)[NH2+]C1                                                                                            | -7.6 | <i>Aspergillus versicolor</i> LZD-14-1     |
| 230 | M230 | C[C@H]1CCC(=O)O[C@H](C)[C@@H](CO[C@H]2[C@@H]([C@@H]([C@@H]([C@@H](C)O2)O)OC)OC)[C@H]2[C@H]/C=C/C(=O)[C@](C)(C[C@H](C)[C@H]1O)[C@H]1[C@@H]([C@H](C[C@@H](C)O1)OC)O)O2 | -7.6 | <i>Streptomyces sp.</i> HK-2006-1          |
| 231 | M231 | c1c(c(c2c(c1C(=O)OC)C(=O)c1c([OH+]2)cc(nc1)C)OC(=O)C)OC                                                                                                              | -7.6 | <i>Diaporthe phaseolorum</i> SKS019        |
| 232 | M232 | C1(=C[C@H]2[C@](CC1)([C@@]1([C@](O2)(CCC1)CO[C@H]1O[C@@H]([C@H]([C@@H]([C@@H]1O)O)CO)C)C)C                                                                           | -7.6 | <i>Stachybotrys chartarum</i>              |
| 233 | M233 | c1(c(cc2c(c1C)c(c1c2)[C@H](OC1=O)[C@]1([C@@H](C(=CC(=O)[C@@H]1OC)OC)O)O)OC)C(=O)OC                                                                                   | -7.6 | <i>Saccharothrix sp.</i> 10-10             |
| 234 | M234 | C([C@@H](CC/C=C/[C@@H]1O[C@H]2[C@@](C1)(OC1=C(C2)C(=O)[C@H](CC1)O)C)C)O(C)C)O                                                                                        | -7.6 | <i>Alternaria alternata</i> k21-1          |
| 235 | M235 | C1(=O)OC(C2=CC(=O)[C@]3([C@H](C=C2C1)COC(=O)CC(C)C)[C@@]1([C@@H]2[C@H]3C(=O)[C@H](O[C@@H]2OC1=O)C)C)C)C                                                              | -7.6 | <i>Talaromyces amestolkiae</i> YX1         |

|     |      |                                                                                                                                                                                                                                 |      |                                            |
|-----|------|---------------------------------------------------------------------------------------------------------------------------------------------------------------------------------------------------------------------------------|------|--------------------------------------------|
| 236 | M236 | [C@@H]1(C([C@H]2[C@](CC1)([C@@]1([C@@H](CC2)C)Oc2c(C1)c(cc1c2CN(C1=O)CC(=O)OC)O)C(C)C)O                                                                                                                                         | -7.6 | <i>Stachybotrys chartarum</i> 952          |
| 237 | M237 | c1c(cc(c1CCC(=O)C[C@@H](C)O)C(=O)O[C@@H](CC(=O)O[C@@H](Cc1c(cc(c1)O)O)C(=O)O[C@@H](CC(=O)O[C@@H](Cc1cc(cc1)O)O)C)C)C)O)O                                                                                                        | -7.6 | <i>Hansfordia sinuosae</i>                 |
| 238 | M238 | C1[C@@]23[C@@H]([C@H]4/C=C\CC[C@H](C)OC(=O)C4)/O)/C(=O)O2)[C@@H]([C@@](OC3=O)([C@@H]1C)C)O                                                                                                                                      | -7.6 | <i>Streptomyces koyangensis</i> SCSIO 5802 |
| 239 | M239 | C1[C@@H](C[C@]2([C@](C1)([C@@H]1[C@@H](CC2=O)[C@]2([C@](CC1)([C@@H](CC2)[C@@H]/C=C/[C@@H](C(C)C)C)C)O)C)O)O                                                                                                                     | -7.6 | <i>Aspergillus terreus</i> GX7-3B          |
| 240 | M240 | c1cc(c2c(c1O)C(=O)c1c(C2=O)cc(cc1)C)O                                                                                                                                                                                           | -7.6 | Mangrove endophytic fungus No.5094         |
| 241 | M241 | CC1=CC(=O)C2=C([OH+])O[C@]1(CC[C@H]3[C@@](CC[C@H]4C(C)(C)[C@H]([C@H](C[C@]34C)OC(=O)C)OC(=O)C)([C@@H]1C2)C)C                                                                                                                    | -7.6 | <i>Neosartorya laciniosa</i> KUFC 7896     |
| 242 | M242 | c1(c(cc(cc1)CO)c1cc(ccc1[C@@](CCCC(C)C)O)CO)O)[C@@](CCCC(C)C)C)O                                                                                                                                                                | -7.6 | <i>Aspergillus</i> sp.                     |
| 243 | M243 | COC(=O)[C@H]1[C@@H](C=CC2=C1C(=O)c1c(cc(cc1[OH+2]CO)O)O                                                                                                                                                                         | -7.6 | <i>Neosartorya fischeri</i> 1008F1         |
| 244 | M244 | [C@H]12N(C(=O)[C@H](NC1=O)Cc1ccc(cc1)O)CCC2                                                                                                                                                                                     | -7.6 | <i>Aspergillus versicolor</i> ZBY-3        |
| 245 | M245 | C1(=O)C2=C(C(=C([OH+])C)C)O[C@@]1(C2)C(=C[C@H]([C@@H]2[C@]3(C=C(=O)C([C@@H]3CC[C@@]12C)(C)C)O)C                                                                                                                                 | -7.6 | <i>Penicillium</i> sp.                     |
| 246 | M246 | C1(=O)C2=C(C(=C([OH+])C)C)O[C@@]1(C2)C(=CC[C@H]2[C@]3(C=CC(=O)C([C@@H]3CC[C@@]12C)(C)C)C                                                                                                                                        | -7.6 | <i>Penicillium</i> sp.                     |
| 247 | M247 | C12=C(C(=O)[N+]3C(=N1)[C@](NC(=O)[C@@H]3Cc1cccc1)(C(C)C)OC)C=CC=CO2                                                                                                                                                             | -7.6 | <i>Paecilomyces variotii</i> EN-291        |
| 248 | M248 | C[C@]1([C@@H]([C@H](C2=C([C@H]1O)C(=O)c1c(C2=O)c(cc(c1)OC)O)O)O)O                                                                                                                                                               | -7.6 | <i>Stemphylium globuliferum</i>            |
| 249 | M249 | c1c(c(c2c(c1C(=O)OC)C(=O)C1=C([OH+2]C=C(O[C@@H]1OC)C)O)OC                                                                                                                                                                       | -7.6 | <i>Chaetomium</i> sp. strain Gö 100/2      |
| 250 | M250 | C[C@@H]1CCC/C=C/C(=O)c2c(cc(cc2O)O)CC(=O)O1                                                                                                                                                                                     | -7.6 | <i>Curvularia</i> sp. strain no. 768       |
| 251 | M251 | C[C@@H]([C@@H]/C=C/C=C/O)O[C@@H]1C=C2COC(=O)[C@]2([C@@]2(C)CCCC(C)(C)[C@H]12)O)O                                                                                                                                                | -7.6 | <i>Aspergillus ustus</i>                   |
| 252 | M252 | CC(C)C[C@H]1C(=O)N2CCCC[C@H]2/C(=N/[C@@H](CCCCC(=O)[C@@H]2CO2)/C(=N/[C@H](Cc2cccc2)/C(=N\1)/O)/O)/O                                                                                                                             | -7.6 | <i>Petriella</i> sp.                       |
| 253 | M253 | CC(=CC[C@H]1CCC[C@H]2[C@@H](C[C@H]3C(=N[C@@H](C)C(=O)N3O)O)C[NH2+][C@@H]12)C                                                                                                                                                    | -7.6 | <i>Aspergillus sydowi</i> PFW1-13          |
| 254 | M254 | c12c(c[nH]c2cccc1)c1c2c([nH]c1)cccc2                                                                                                                                                                                            | -7.5 | <i>Aspergillus</i> sp.                     |
| 255 | M255 | C1(=O)/C=C/[C@@H]2[C@@]34C(=C(C(=O)CC[C@H](C)O1)C(=O)O3)O[C@@]([C@H](C4)C)([C@H]2O)C                                                                                                                                            | -7.5 | <i>Streptomyces koyangensis</i> SCSIO 5802 |
| 256 | M256 | C1(=O)[C@H]2N(C(=O)[C@H](NC(=O)[C@H]([C@H](OC(=O)[C@@H](N(C)C(=O)CN1C)C(C)C)NC(=O)c1ccc(c3c1nc1c(O3)c3c(c1C(=O)N[C@H]1[C@@H](C)OC(=O)[C@H](C(C)N(C(=O)CN(C)C(=O)[C@@H]4CCCN4C(=O)[C@@H](C(C)NC1=O)C)nc(o3)CCC(=O)O)C)C)C)C)CCC2 | -7.5 | <i>Streptomyces</i> sp. IMB094             |

|     |             |                                                                                                                                                                                             |      |                                            |
|-----|-------------|---------------------------------------------------------------------------------------------------------------------------------------------------------------------------------------------|------|--------------------------------------------|
| 257 | <b>M257</b> | C1(=O)/C=C/[C@@H]2[C@@]34C(=C(C(=O)CC[C@@H]1C)C(=O)O3)O[C@@]([C@H](C4C)([C@H]2O)C                                                                                                           | -7.5 | <i>Streptomyces koyangensis</i> SCSIO 5802 |
| 258 | <b>M258</b> | C1C[C@H]([C@@H]2[C@H](C1)[C@@H]([C@@H]([NH2+])2)/C=C/[C@@H](CO)O)\O)N[C@@H]1[C@@H](C(=O)O)CCCC1)C(=O)O                                                                                      | -7.5 | <i>Streptomyces</i> sp. CMN-62             |
| 259 | <b>M259</b> | C1(=C2[C@]34[C@H](C(=O)[C@H](CC1)C)[C@H]([C@@H]1[C@@]3(OC2=O)C[C@@H]([C@]([C@H]1O)(C)O4)C)S[C@@H]1[C@@H]2[C@@]34[C@]5([C@@H]1[C@@H]([C@@]([C@H](C5)C)(C)O3)O)OC(=O)C4=C(CC[C@@H](C2=O)C)O)O | -7.5 | <i>Streptomyces koyangensis</i> SCSIO 5802 |
| 260 | <b>M260</b> | c12cccc3c1c(c(=O)[n+]2C)c1c(c3)C(N(C1=O)[C@@H](CC(=O)C)C)(C)C                                                                                                                               | -7.5 | <i>Penicillium commune</i> DFFSCS026       |
| 261 | <b>M261</b> | C(C[C@@H](CCCCC)C)C/C=C/C(=O)[C@@H](CC[C@@H]1[C@H](C(=O)NC(=C)C(=O)NC[C@@H](C(=O)N[C@@H](C(=O)O1)CCC(=O)N)C)C)\C                                                                            | -7.5 | <i>Diaporthe phaseolorum</i> SKS019        |
| 262 | <b>M262</b> | [C@H]1(CC[C@@H]([C@H]2[C@@]1(C=C([C@H]([C@@H]2/C=C/C(=O)O)\C)/C=C/C[C@@H](C[C@H](C[C@H]([C@@H]([C@H](C(C)O)C)O)O)/C)C)C)C)O                                                                 | -7.5 | <i>Streptomyces</i> sp. SCSGAA 0027        |
| 263 | <b>M263</b> | [C@@]12([C@H]3[C@](CC[C@@H]1C(OC(=O)C=C2)(C)C)([C@@]12[C@@](C(=O)[C@@](C3)(C)C2=C)(O)[C@@H](C)OC1=O)C)C                                                                                     | -7.5 | <i>Penicillium brasilianum</i>             |
| 264 | <b>M264</b> | C1(=O)OC(C2=CC(=O)[C@]3([C@H](C(=C2C1)COC(=O)C)C[C@@]1([C@@H]2[C@H]3C(=O)[C@H](O[C@@H]2OC1=O)C)C)C)C                                                                                        | -7.5 | <i>Talaromyces amestolkiae</i> YX1         |
| 265 | <b>M265</b> | c1(cc2c(c1)CC(=O)O[C@@H](CCC/C=C/C2=O)C)O)O                                                                                                                                                 | -7.5 | <i>Penicillium Sumatrense</i>              |
| 266 | <b>M266</b> | c1c(cc(c(c1CCC(=O)C)C(=O)O[C@@H](CC(=O)O[C@@H](Cc1c(c(cc(c1)O)O)C(=O)O[C@@H](CC(=O)O[C@@H](Cc1cc(cc(c1)O)O)C)C)C)O)O                                                                        | -7.5 | <i>Hansfordia sinuosae</i>                 |
| 267 | <b>M267</b> | c1c(cc(c(c1CCC(=O)C)C[C@@H](C)OC)C(=O)O[C@@H](CC(=O)O[C@@H](Cc1c(c(cc(c1)O)O)C(=O)O[C@@H](CC(=O)O[C@@H](Cc1cc(cc(c1)O)O)C)C)C)O)O                                                           | -7.5 | <i>Hansfordia sinuosae</i>                 |
| 268 | <b>M268</b> | c1c(cc2c(c1O)C(=O)c1c(C2=O)cc(cc1O)O)C                                                                                                                                                      | -7.5 | <i>Penicillium</i> sp. SCSGAF 0023         |
| 269 | <b>M269</b> | C1C[C@](c2c(C1)c1c(c(c2)O)[C@@H]2[C@](CC1)([C@@H](CO2)O)C)(C)COC(=O)C                                                                                                                       | -7.5 | <i>Aspergillus wentii</i> SD-310           |
| 270 | <b>M270</b> | c12c([OH+]C(=O)C=C1)c1c(c2C)cco1)CC=C(C)C                                                                                                                                                   | -7.5 | <i>Penicillium</i> sp. ZH16                |
| 271 | <b>M271</b> | N(C(=O)[C@@H](N(C(=O)[C@@H](N(C(=O)[C@@H]1N(C(=O)[C@H](O)Cc2ccc(cc2)CCC1)CO)C)[C@H](CC)C)[C@H](C(=O)O)Cc1ccc(cc1)OCC=C(C)C                                                                  | -7.5 | <i>Bionectria ochroleuca</i>               |
| 272 | <b>M272</b> | c1c(cc2c(c1C(=O)OC)C(=O)c1c([OH+]2)cc(c(c1)O)C)O                                                                                                                                            | -7.5 | <i>Phomopsis</i> sp. SK7RN3G1              |
| 273 | <b>M273</b> | CC(=CCC/C(=C)COc1cc2[C@H](C)N(c3ccc(cc3OCC=C(C)C)OC)C(=O)c2c(c1C)O)C)C)C                                                                                                                    | -7.5 | <i>Stachylidium</i> sp.                    |
| 274 | <b>M274</b> | CC(=CCc1c(C)cc(cc1O)c1cc(C)cc(c1)O)O)C                                                                                                                                                      | -7.5 | <i>Aspergillus versicolor</i>              |
| 275 | <b>M275</b> | c1ccc2c(c1)C(=O)[N+]1c3cccc3C(=N[C@@H](CCC(=N)O)C1=N2)O                                                                                                                                     | -7.5 | <i>Penicillium aurantiogriseum</i>         |
| 276 | <b>M276</b> | C[C@@]1(CC2=C(C[C@H]1O)C(=O)c1c(C2=O)cc(cc1O)OC)O                                                                                                                                           | -7.5 | <i>Stemphylium globuliferum</i>            |



|     |      |                                                                                                                                   |      |                                                    |
|-----|------|-----------------------------------------------------------------------------------------------------------------------------------|------|----------------------------------------------------|
| 277 | M277 | C1CC[C@H]2[C@H](C1)[C@H](C[NH2+])2[C@@H]1[C@H]([C@H]([NH2+][C@@H]1C(=O)OC)C(=O)OC)[C@H]1[C@@H]2[C@H]([NH2+][C1]CC[C@@H](C2)Cl     | -7.5 | <i>Marinispora</i> sp. NPS12745                    |
| 278 | M278 | c12c(cc(cc1O)C)C(=O)c1c(C2=O)c(ccc1)OC                                                                                            | -7.5 | <i>Nocardia</i> sp. ALAA 2000                      |
| 279 | M279 | c1c(c2c(c1C(=O)OC)C(=O)C1=C([OH+])2)C=C(OC1)C)O)OC                                                                                | -7.5 | <i>Chaetomium</i> sp. strain Gö 100/2              |
| 280 | M280 | c1c(cc2c(c1C(=O)O)C(=O)C1=C([OH+])2)C=C(O[C@@H]1OC)C)O)O                                                                          | -7.5 | <i>Chaetomium</i> sp. strain Gö 100/2              |
| 281 | M281 | CC1(C)CCC[C@@]2(C)[C@H]1[C@@H](C=C1COC(=O)[C@]21O)OC(=O)/C=C/C=C/C(=O)O                                                           | -7.5 | <i>Aspergillus ustus</i>                           |
| 282 | M282 | [C@H]1(NC(=O)[C@H]2N(C1=O)[C@H](C2)O)Cc1cccc1                                                                                     | -7.4 | <i>Aspergillus</i> sp.                             |
| 283 | M283 | c12c3c([nH]c2CCCC1)cncc3                                                                                                          | -7.4 | <i>Aspergillus</i> sp.                             |
| 284 | M284 | C1C[C@H]([C@@H]2[C@@H]3[C@@H]1N[C@H](C(=O)N[C@@H](C[C@@H]3C[NH2+])2)CO)[C@H](CC)C(C)C)C=C                                         | -7.4 | <i>Marinactinospora thermotolerans</i> SCSIO 00652 |
| 285 | M285 | c12cccc3c1c(c(=O)[nH+])2)c1c(c3)C(N(C1=O)[C@@H](CC(=O)C)C)C)C                                                                     | -7.4 | <i>Penicillium commune</i><br>DFFSCS026            |
| 286 | M286 | c12cccc3c1[C@@](C(=O)N2C)([C@H]1[C@@H](C3)CNC1=O)O                                                                                | -7.4 | <i>Penicillium commune</i><br>DFFSCS026            |
| 287 | M287 | c1c(cc2c(c1C(=O)OC)C(=O)c1c([OH+])2)cc(nc1)CO)O                                                                                   | -7.4 | <i>Diaporthe phaseolorum</i> SKS019                |
| 288 | M288 | c1c(cc2c(c1O)C(=O)c1c(C2=O)cc(nc1)C)OC                                                                                            | -7.4 | <i>Diaporthe phaseolorum</i> SKS019                |
| 289 | M289 | C1=C[C@]2([C@H]3[C@]([C@@H]1O)([C@@]1(C=C[C@H]3OC2=O)COC(=O)C1)O)C)C                                                              | -7.4 | <i>Aspergillus wentii</i> SD-310                   |
| 290 | M290 | C([C@@H](CC/C=C/[C@@H]1O[C@H]2[C@@](C1)(OC1=C(C2)C(=O)CC[C@@H]1O)C)/C)O)C)C)O                                                     | -7.4 | <i>Alternaria alternata</i> k21-1                  |
| 291 | M291 | c1(cc(c2c(c1C=O)[C@](C=C2)(CC/C=C/C)\CC[C@@H](O)C(C)(O)C)O)COC(=O)C                                                               | -7.4 | <i>Stachybotrys chartarum</i> 952                  |
| 292 | M292 | c1c(cc(c(c1O)C(=O)O)c1cc(c2c(c1C)scn2)O)OC                                                                                        | -7.4 | <i>Alternaria</i> sp.                              |
| 293 | M293 | c1c(cc(c(c1C)C(=O)O)[C@@H](CC(=O)O)[C@@H](Cc1c(cc(c1)O)O)C(=O)O)[C@@H](CC(=O)O)[C@@H](Cc1cc(cc(c1)O)O)C)C)C)O)O                   | -7.4 | <i>Hansfordia sinuosae</i>                         |
| 294 | M294 | c1c(cc(c(c1CCC(=O)/C=C/C)C(=O)O)[C@@H](CC(=O)O)[C@@H](Cc1c(cc(c1)O)O)C(=O)O)[C@@H](CC(=O)O)[C@@H](Cc1c(cc(c1)O)O)C(=O)O)C)C)C)O)O | -7.4 | <i>Hansfordia sinuosae</i>                         |
| 295 | M295 | c1c(cc2c(c1O)C(=O)c1c(C2=O)cc(cc1O)O)CO                                                                                           | -7.4 | <i>Penicillium</i> sp. SCSGAF 0023                 |
| 296 | M296 | C/C=C/CC1=C(C=C(C)[OH+][C1=O]O)/CC/C=C/C)\CC[C@@H]1C(=C)CC[C@@H](C1(C)C)OC(=O)C                                                   | -7.4 | <i>Neosartorya laciniosa</i> KUFC 7896             |
| 297 | M297 | c1(c(cc(cc1)Cc1c(cc(c1)C(CCCC(C)C)(C)C)O)O)[C@@](CCCC(C)C)(C)O                                                                    | -7.4 | <i>Aspergillus</i> sp.                             |
| 298 | M298 | [C@H]12N(C(=O)[C@H](NC1=O)Cc1cccc1)CCC2                                                                                           | -7.4 | <i>Aspergillus versicolor</i> ZBY-3                |
| 299 | M299 | O[C@H]1C=CC[C@@H]2[C@]34SS[C@@]5(C[C@@H]6[C@@H](O)C=C[C@H](O)[C@H]6N5C3=O)C(=O)N4[C@H]12                                          | -7.4 | <i>Penicillium brocae</i> MA-231                   |
| 300 | M300 | c1ccc2c3c1O[C@]14c5c(C(=O)[C@H]([C@H]1OC)Cl)c(ccc5O[C@]3([C@@H](CC2=O)OC)O4)O                                                     | -7.4 | <i>Lasiodiplodia theobromae</i> ZI-HQ1             |

|     |      |                                                                                                                                                                                  |      |                                       |
|-----|------|----------------------------------------------------------------------------------------------------------------------------------------------------------------------------------|------|---------------------------------------|
| 301 | M301 | <chem>CC(=O)O[C@@H]1[C@H](C2=C([C@H]([C@]1(C)O)O)C(=O)c1c(C2=O)c(cc(c1)OC)O)O</chem>                                                                                             | -7.4 | <i>Stemphylium globuliferum</i>       |
| 302 | M302 | <chem>C1C([C@@](C(=CC1=O)C)(O)/C=C/C(=C\C(=O)O)[C@@H]1[C@H]([C@@H](C=C(C1=O)CO)O)O)/C)C</chem>                                                                                   | -7.4 | <i>Nigrospora</i> sp.                 |
| 303 | M303 | <chem>C[C@H]1[C@H](C)OCc2c1c(C)c(c1c(c(C)c3[C@H](C)[C@@H](C)OCc3c1O)O)c2O)O</chem>                                                                                               | -7.4 | <i>Aspergillus</i> sp. MF-93          |
| 304 | M304 | <chem>c1(ccccc1)C[C@H]1N(C(=O)[C@@H](OC(=O)[C@@H](NC(=O)[C@@H](OC(=O)[C@@H](N(C(=O)[C@H](NC1=O)C)C)C(C)C)CC(C)C</chem>                                                           | -7.4 | <i>Spicellum roseum</i>               |
| 305 | M305 | <chem>c1ccc(cc1)CC1=CC(=O)C(=C[OH+])1C(=O)N</chem>                                                                                                                               | -7.4 | <i>Aspergillus carbonarius</i>        |
| 306 | M306 | <chem>[C@H]1(NC(=O)[C@@H]2N(C1=O)CCC2)Cc1ccc(cc1)O</chem>                                                                                                                        | -7.3 | <i>Aspergillus</i> sp.                |
| 307 | M307 | <chem>O=C1N2[C@H](CCC2)C(=O)N[C@@H]1Cc1cccc1</chem>                                                                                                                              | -7.3 | <i>Aspergillus</i> sp.                |
| 308 | M308 | <chem>C1CCC[C@H]2[C@@H]1[C@H](C[N@H+]2CC=C(C)C)[C@@H](C(=O)OC)NC(=O)[C@H](CC1CCCC1)O</chem>                                                                                      | -7.3 | <i>Aspergillus</i> sp. SCSIO XWS03F03 |
| 309 | M309 | <chem>c1c(cc2c(c1C(=O)OC)C(=O)c1c([OH+])2)cc(nc1)C)OC</chem>                                                                                                                     | -7.3 | <i>Diaporthe phaseolorum</i> SKS019   |
| 310 | M310 | <chem>c1c(c(c2c(c1C(=O)OC)C(=O)c1c([OH+])2)cc(nc1)C)OC)OC</chem>                                                                                                                 | -7.3 | <i>Diaporthe phaseolorum</i> SKS019   |
| 311 | M311 | <chem>C1CC[C@H]2[C@@H](C1)[NH2+][C@@H]([C@H](C2=O)C(=O)O)[C@@H]1CC[C@H](NH2+)1</chem>                                                                                            | -7.3 | <i>Penicillium</i> sp.                |
| 312 | M312 | <chem>[C@H]1(C[C@H]([C@@H]([C@H]2[C@@]1C=C([C@H]([C@@H]2/C=C/C(=O)O)\C)/C=C/C[C@@H](C[C@H](C[C@H]([C@@H]([C@H](C(C)O)C)O)O)/C)C)C)O)O</chem>                                     | -7.3 | <i>Streptomyces</i> sp. SCSGAA 0027   |
| 313 | M313 | <chem>c1(ccc(cc1)[N](=O)O)C(=O)O[C@@H]1C[C@H]2[C@@]([C@@]3([C@H]1[C@@](CCC3)(C)CO)C(COC2=O)O</chem>                                                                              | -7.3 | <i>Aspergillus ochraceus</i> Jcma1F17 |
| 314 | M314 | <chem>C1[C@@H](C([C@H]2[C@](C1)(C1=CC(=C)[C@@]([C@H](C1=CC2)O)(C=C)C)O)(C)C)O</chem>                                                                                             | -7.3 | <i>Aspergillus wentii</i> SD-310      |
| 315 | M315 | <chem>C(=CCC/C=C/[C@@H]1O[C@H]2[C@@](C1)(OC1=C(C2)C(=O)CC[C@@H]1O)C)/C)C)C</chem>                                                                                                | -7.3 | <i>Alternaria alternata</i> k21-1     |
| 316 | M316 | <chem>[C@@]1([C@H]2[C@](CC[C@@H]1C(O)C)C)C([C@@]13[C@@](C(=O)[C@@](C2)(C)C3=C)O)[C@@H](C)OC1=O)C)C(CCC(=O)OC</chem>                                                              | -7.3 | <i>Penicillium brasilianum</i>        |
| 317 | M317 | <chem>c1(cc(c2c(c1)CC(=O)O[C@H](CCCCC2=O)[C@@H](C)O)O)O</chem>                                                                                                                   | -7.3 | <i>Penicillium Sumatrense</i>         |
| 318 | M318 | <chem>c1c(cc(c(c1O)C(=O)O[C@@H](CC(=O)O[C@@H](Cc1cc(cc(c1)O)O)C)C)CC(=O)C[C@H](O)C)O</chem>                                                                                      | -7.3 | <i>Hansfordia sinuosae</i>            |
| 319 | M319 | <chem>c1(cc(c2c(c1)[C@](OC2=O)(c1c(c(ccc1O)CC=C(C)O)C)O)C</chem>                                                                                                                 | -7.3 | <i>Ascomycota</i> sp. SK2YWS-L        |
| 320 | M320 | <chem>N12C(=O)[C@H](OC(=O)[C@@H](N(C(=O)[C@@H](NC(=O)[C@@H](N(C(=O)[C@@H](NC(=O)[C@@H]1CCCC2)CO)C)[C@@H](C)CC)Cc1ccc(cc1)OCC=C(C)C)C)Cc1cccc1</chem>                             | -7.3 | <i>Bionectria ochroleuca</i>          |
| 321 | M321 | <chem>C1(=O)[C@@](C(=O)[C@@H]2C(=C1)C[C@H]([N@H+](C2)CCCC[N@H+]1C[C@H]2C(=O)[C@@](C(=O)C=C2C[C@@H]1/C=C/C(=C/[C@@H](CC)C)/C)C)C)OC(=O)C)/C=C/C(=C/[C@H](CC)C)/C)C)OC(=O)C</chem> | -7.3 | <i>Penicillium</i> sp. 303            |

|     |      |                                                                                                                                                                                                                                                            |      |                                         |
|-----|------|------------------------------------------------------------------------------------------------------------------------------------------------------------------------------------------------------------------------------------------------------------|------|-----------------------------------------|
| 322 | M322 | O1C(=C(C(=O)[C@]21C(=O)N[C@@]([C@@H]2O)(OC)C(=O)c1cccc1C)[C@H]([C@@H]/C=C\CC)O)O                                                                                                                                                                           | -7.3 | <i>Aspergillus</i> sp. BRF 030          |
| 323 | M323 | c1c(ccc(c1)/C=C/C(=C/c1ccc(cc1)O)/[N]#C)\[N]#C)O                                                                                                                                                                                                           | -7.3 | <i>Penicillium commune</i> SD-118       |
| 324 | M324 | c1(c(cc2c(c1O)C(=O)c1c(C2=O)cc(c(c1O)[C@H](CCCC)O)OC)Cl                                                                                                                                                                                                    | -7.3 | <i>Aspergillus</i> sp. SCSIO F063       |
| 325 | M325 | c1ccc2c(c1)C(=C(C(=O)[NH+2]OC)c1cc(ccc1)O                                                                                                                                                                                                                  | -7.3 | <i>Aspergillus versicolor</i> Y31-2     |
| 326 | M326 | CC(C)C(=O)Cc1c(C)cc(cc1Oc1cc(C)cc(c1)O)O                                                                                                                                                                                                                   | -7.3 | <i>Aspergillus versicolor</i>           |
| 327 | M327 | Cc1cc(c2c(c1)[OH+1]C=C(C[C@@H]([C@](C[C@H](C(=O)OC)O)(C(=O)OC)O)S1)C2=O)O                                                                                                                                                                                  | -7.3 | <i>Penicillium oxalicum</i> SCSGAF 0023 |
| 328 | M328 | C1C2=C(C(=O)c3c([OH+2]cc(cc3O)C)C(=O)C1                                                                                                                                                                                                                    | -7.3 | <i>Penicillium oxalicum</i> SCSGAF 0023 |
| 329 | M329 | [C@@H]1(CC[C@H]2[C@H](C1)[C@H](C[NH2+2])[C@@H]1[C@H]([C@H]([NH2+][C@@H]1C(=O)OC)C(=O)OC)[C@H]1[C@@H]2[C@H]([NH2+1]C)CC[C@@H](C2)Cl)Cl                                                                                                                      | -7.3 | <i>Marinispora</i> . sp. NPS12745       |
| 330 | M330 | c1cc(ccc1)C[C@@H](O[C@@H](CC(C)C)C(=O)O[C@@H]1[C@H]([C@@H](C=C(C1=O)CO)O)C(=O)OC                                                                                                                                                                           | -7.3 | <i>Nigrospora</i> sp.                   |
| 331 | M331 | CC1(C)CCC[C@@]2(C)[C@H]1[C@@H](C=C1COC(=O)[C@]21O)OC(=O)/C=C/C=C/C=O                                                                                                                                                                                       | -7.3 | <i>Aspergillus ustus</i>                |
| 332 | M332 | [C@H]1(NC(=O)[C@H]2N(C1=O)CCC2)Cc1cccc1                                                                                                                                                                                                                    | -7.2 | <i>Aspergillus</i> sp.                  |
| 333 | M333 | C1(=O)N[C@H](C(=O)N2[C@H]1CCC2)Cc1cccc1                                                                                                                                                                                                                    | -7.2 | <i>Aspergillus</i> sp.                  |
| 334 | M334 | c1(ccccc1)C[C@@H](N(C(=O)[C@@H](NC(=O)C)C(C)C)C(=O)N[C@H](C(=O)O)CC(C)C                                                                                                                                                                                    | -7.2 | <i>Simplicillium obclavatum</i>         |
| 335 | M335 | C1(C[C@@H]2/C=C\C[C@@H]([C@@H](C=C)CC[C@@]12O)NC(=O)/C=C(/CCO)\C)O)/CO)(C)C                                                                                                                                                                                | -7.2 | <i>Hansfordia sinuosae</i>              |
| 336 | M336 | C1[C@@H](C([C@H]2[C@](C1)(C1=CC(=C)[C@@]([C@@H](C1=CC2)O)(C=C)C)O)(C)C)O                                                                                                                                                                                   | -7.2 | <i>Aspergillus wentii</i> SD-310        |
| 337 | M337 | C(/C=C/C/C(=C/[C@@H]1O[C@H]2[C@@](C1)(OC1=C(C2)C(=O)CC[C@@H]1O)C)/C)(OO)(C)C                                                                                                                                                                               | -7.2 | <i>Alternaria alternata</i> k21-1       |
| 338 | M338 | [C@H]1([C@@H]([C@@H]2[C@@H](CC1)[C@@]([C@@H](C(=C2)C)/C=C/C)/C)/C=C/C=C/C=C/C(=O)O)C)O)C                                                                                                                                                                   | -7.2 | <i>Janthinobacterium</i> spp. ZZ145     |
| 339 | M339 | O1[C@H]([C@H]([C@H](C[C@@H]1O[C@@H]1C[C@@](O[C@@H]([C@H]1CC)C)([C@H]([C@@H]([C@@H]([C@@H]1[C@H]/C=C/C=C/C(=C)O[C@@H]([C@H]/C=C/C=C/C(=O)O1)C)[C@H]([C@H]([C@@H]([C@]1[C[C@H]([C@@H]([C@H](O1)C)CC)O[C@H]1C[C@@H]([C@@H]([C@@H](O1)C)O)O)C)O)C)C)O)C)OC)O)C | -7.2 | <i>Streptomyces</i> sp. 7-145           |
| 340 | M340 | c1c(cc(c(c1CCC(=O)C[C@@H](C)OC)C(=O)O[C@@H](CC(=O)O[C@@H](Cc1c(c(cc(c1)O)O)C(=O)O)C)C(=O)O)C)C(=O)O)C)O)C                                                                                                                                                  | -7.2 | <i>Hansfordia sinuosae</i>              |



|     |      |                                                                                                                              |      |                                            |
|-----|------|------------------------------------------------------------------------------------------------------------------------------|------|--------------------------------------------|
| 363 | M363 | [C@H]1(CC=C2[C@@]([C@H]1O)(Oc1c(C2=O)c(ccc1c1c(O)c2C(=O)C3=C(O)C[C@@H]([C@H]([C@@]3(Oc2cc1)C(=O)OC)O)C(=O)OC)O)C             | -7.1 | <i>Penicillium</i> sp. SCSGAF 0023         |
| 364 | M364 | c1c(cc(c1C(=O)OC)C(=O)c1c(ccc1O)CC=C(C)C)O)C                                                                                 | -7.1 | <i>Ascomycota</i> sp. SK2YWS-L             |
| 365 | M365 | c1(ccc2c(c1C(=O)OC)C(=O)c1c(cc(cc1O)C)[OH+])2)O                                                                              | -7.1 | <i>Penicillium</i> sp. ZJ-SY2              |
| 366 | M366 | c1(ccc2c(c1C(=O)OC)C(=O)c1c(cc(cc1O)CO)[OH+])2)O                                                                             | -7.1 | <i>Penicillium</i> sp. ZJ-SY2              |
| 367 | M367 | CC(=CCC/C(=C)\COc1cc2[C@@H](C)N(c3ccc(cc3OCC=C(C)C)OC)C(=O)c2c(c1C)OC)/C)C                                                   | -7.1 | <i>Stachyldium</i> sp.                     |
| 368 | M368 | C1(=O)[C@@]([C@@H]([C@@H]2C(=C1C)C=C(OC2)/C=C/[C@H]([C@@]([C@@H]([C@@H](CC)C)O)O)C)O)O)C                                     | -7.1 | <i>Penicillium sclerotiorum</i> M-22       |
| 369 | M369 | CCCCC[C@@H](C)C(=O)C1=C([C@@]2[C@H](C)[C@@H]3c4c(cc(c(C)c4[C@@H](C)[C@@H](C)O3)O)O2)N(C)C1=O)O                               | -7.1 | <i>Penicillium citrinum</i>                |
| 370 | M370 | CC1=CC(=O)c2c(cc(c([C@@H]3C[C@H](C(=O)O3)OC)c2[OH+])1)OC)O                                                                   | -7.1 | <i>Rhizidhysterion rufulum</i>             |
| 371 | M371 | O=C1N[C@H](C(=O)N[C@@H]1Cc1cccc1)C(C)C                                                                                       | -7.1 | <i>Cladosporium</i> sp. F14                |
| 372 | M372 | c1(ccc(cc1O)C[C@@H]1NC(=O)[C@H](N(C(=O)[C@@H](NC(=O)[C@@H](NC(=O)[C@H]2N(C1=O)CCCC)C(C)C)[C@@H](C)CC)C)Cc1ccc(cc1)O          | -7.1 | <i>Aspergillus versicolor</i> MST-MF495    |
| 373 | M373 | C1(=O)O[C@H](c2c(C1)cc(cc2O)O)CCCCC[C@@H](C)O                                                                                | -7.1 | <i>Pestalotiopsis</i> sp.                  |
| 374 | M374 | c1(cc(c2c(c1)[OH+])C(=CC2=O)CCCCC)CC(=O)O)O                                                                                  | -7.1 | <i>Pestalotiopsis</i> sp.                  |
| 375 | M375 | C/C=C/[C@@H]([C@@H](C1=C(C)C(=O)[C@]2([C@H]([C@](C(=O)c3cccc3)(N=C2O)OC)O)O1)O)O                                             | -7.1 | <i>Aspergillus sydowi</i> PFW1-13          |
| 376 | M376 | C1=C[C@]2([C@H]([C@@H](C1=O)C)[C@@H](C(=O)[C@]1([C@@H]2CC[C@@H]2[C@@]1(C[C@@H](/C/2=C\CCCC(C)C)O)/C(=O)O)OC(=O)C)C)OC(=O)C)C | -7.1 | <i>Aspergillus sydowi</i> PFW1-13          |
| 377 | M377 | c1(cc2c(cc1C)nc(c2O)O)C(=O)O)C                                                                                               | -7   | <i>Aspergillus</i> sp.                     |
| 378 | M378 | C1(=O)N[C@H](C(=O)N2[C@H]1CCC2)Cc1ccc(cc1)O                                                                                  | -7   | <i>Aspergillus</i> sp.                     |
| 379 | M379 | S1SSC[C@H]2NC(=O)[C@H](NC(=O)C[C@@H](/C=C/CC1)OC(=O)[C@@H](NC(=O)/C(=C/C)/NC2=O)C(C)C)C(C)C                                  | -7   | <i>Chromobacterium</i> sp. HS-13-94        |
| 380 | M380 | c1(ccccc1)C[C@@H](N(C(=O)[C@@H](NC(=O)C)[C@@H](CC)C)C(=O)N[C@@H](C(=O)O)CC(C)C                                               | -7   | <i>Simplicillium obclavatum</i> EIODSF 020 |
| 381 | M381 | c1ccc2c(c1)[C@]1([C@](N2)(N2[C@@H](C1)C(=O)N[C@H](C2=O)C)C(C)(C=C)C)O                                                        | -7   | <i>Eurotium</i> sp. SCSIO F452             |
| 382 | M382 | c1(cc(c(cc1)[C@](CCCC(C)C)O)O)C(=O)O                                                                                         | -7   | <i>Aspergillus</i> sp.                     |
| 383 | M383 | [C@@H]1([C@@]([C@@H]2[C@@](C1)(CC(=O)C(=CC2)C)C(C)C)O)O                                                                      | -7   | <i>Trichoderma virens</i>                  |
| 384 | M384 | C1(=O)[C@@]([C@]2(C=C1)C=C[C@H]([C@@H]2)OC(=O)/C=C/C(=C/C(C)C)/C)C(C(=C)/C(=N\O)/C)OC                                        | -7   | <i>Cochliobolus lunatus</i> SCSIO41401     |
| 385 | M385 | C1=C[C@]2([C@H]3[C@](C1=O)([C@@]1(C=C[C@H]3OC2=O)COC(=O)C1)O)C)C                                                             | -7   | <i>Aspergillus wentii</i> SD-310           |
| 386 | M386 | c1(c(cc2c(c1C)c1c(c2)C(=O)[C@]2([C@@](C1=O)(C(=CC(=O)[C@@H]2OC)O)C)O)O)OC)C(=O)OC                                            | -7   | <i>Saccharothrix</i> sp. 10-10             |

|     |      |                                                                                                                                                                                                                                                                                |      |                                            |
|-----|------|--------------------------------------------------------------------------------------------------------------------------------------------------------------------------------------------------------------------------------------------------------------------------------|------|--------------------------------------------|
| 387 | M387 | <chem>c1(cc2c(c1)OCc1c2nc(cc1)C)C(=O)O)OC</chem>                                                                                                                                                                                                                               | -7   | <i>Phomopsis</i> sp. 33                    |
| 388 | M388 | <chem>c1(cc2c(c1O)OCc1c2nc(cc1)C)C(=O)O)OC</chem>                                                                                                                                                                                                                              | -7   | <i>Phomopsis</i> sp. 33                    |
| 389 | M389 | <chem>O1[C@H]([C@H]([C@H]C[C@@H]1O[C@@H]1C[C@@]([O[C@@H]([C@H]1CC)C)C[C@H]([C@@H]([C@@H]([C@@H]1[C@H](/C=C/C=C/C(=C)O[C@@H]([C@H](/C=C/C=C/C(=O)O1)C)C[C@H]([C@@H]([C@@H]([C@@H]1[C@H]([C@@H]([C@H](O1)C)C)O[C@H]1C[C@@H]([C@@H]([C@@H](O1)C)O)O)OC)C)O)C)C)O)C)OC)O)C</chem>  | -7   | <i>Streptomyces</i> sp. 7-145              |
| 390 | M390 | <chem>[C@H]1([C@@H]([C@@H]2[C@@H](CC1)[C@@]([C@@H](C=C2)CO)/C=C/C)/C)/C=C/C=C/C=C/C=C/C(=O)C)O)C</chem>                                                                                                                                                                        | -7   | <i>Janthinobacterium</i> spp. ZZ145        |
| 391 | M391 | <chem>c1(cc2c(c1)CC(=O)O[C@H](CCCCC2=O)[C@@H](C)O)O)O</chem>                                                                                                                                                                                                                   | -7   | <i>Penicillium Sumatrense</i>              |
| 392 | M392 | <chem>c1(cc2c(c1)CC(=O)O[C@H](CCCCC2=O)C)O)O</chem>                                                                                                                                                                                                                            | -7   | <i>Penicillium Sumatrense</i>              |
| 393 | M393 | <chem>O1[C@H]([C@H]([C@H]C[C@@H]1O[C@@H]1C[C@@]([O[C@@H]([C@H]1CC)C)C[C@H]([C@@H]([C@@H]([C@@H]1[C@H](/C=C/C=C/C(=C)O[C@@H]([C@H](/C=C/C=C/C(=O)O1)C)C[C@H]([C@@H]([C@@H]([C@@H]1[C@H]([C@@H]([C@H](O1)C)CC)O[C@H]1C[C@@H]([C@@H]([C@@H](O1)C)O)O)OC)C)O)C)C)O)C)OC)O)C</chem> | -7   | <i>Streptomyces</i> sp. 7-145              |
| 394 | M394 | <chem>C=C1CC[C@H]2[C@@](C)(CC[C@H]3C(C)C)[C@H](CC[C@]23C)OC(=O)C[C@@H]1CC1=C(C=C(C)[OH+]C1=O)O</chem>                                                                                                                                                                          | -7   | <i>Neosartorya laciniosa</i> KUFC 7896     |
| 395 | M395 | <chem>c1(cc2c2c3c1[C@H](OC(=O)c3c(cc2C)O)C(=O)OC)O)O</chem>                                                                                                                                                                                                                    | -7   | <i>Penicillium purpurogenum</i> G59        |
| 396 | M396 | <chem>C1CC(=[NH2])N[C@@H]1C1=Nc2c(C(=O)[N+]1c1c(C(=O)O)cccc1)cccc2</chem>                                                                                                                                                                                                      | -7   | <i>Penicillium aurantiogriseum</i>         |
| 397 | M397 | <chem>COC(=O)c1cccc1[N+]1C(=Nc2cccc2C1=O)[C@@H]1CCC(=N)N1</chem>                                                                                                                                                                                                               | -7   | <i>Penicillium aurantiogriseum</i>         |
| 398 | M398 | <chem>c1c(cc2c(c1O)C(=O)C1=C([OH+]2)C=C[C@@H]([C@H]1C(=O)OC)O)CO</chem>                                                                                                                                                                                                        | -7   | <i>Engyodontium album</i> DFFSCS021        |
| 399 | M399 | <chem>c1ccc2c(c1O)C(=O)C1=C(C2=O)[C@H]([C@H]([C@H](O1)C)O)O</chem>                                                                                                                                                                                                             | -7   | <i>Acaromyces ingoldii</i> FS121           |
| 400 | M400 | <chem>c1cccc1C[C@@H]1N2C(=O)[C@]3(C=CC=COC3=NC2=C(C(C)C)NC1=O)OCC(=O)C(C)C</chem>                                                                                                                                                                                              | -7   | <i>Paecilomyces variotii</i> EN-291        |
| 401 | M401 | <chem>C[C@@]12CCCCC1=CC=C1C2=CC=CC1=O</chem>                                                                                                                                                                                                                                   | -7   | <i>Pseudomonas stutzeri</i> CMG 1030       |
| 402 | M402 | <chem>CC(C)CCCC/C=N/[C@H](C[C@H]1CC[C@@H](CC1O)/C=N/[C@@H](CO)/C(=N/[C@H](CC(C)C)/C=N/[C@@H](C[C@H]1C[NH2+][C@H]2CCCC[C@@H]12)/C=N/[C@@H](CCCNC(=N)N)C(=O)O)/O)/O)/O)/O</chem>                                                                                                 | -7   | <i>Brevibacillus laterosporus</i> PNG276   |
| 403 | M403 | <chem>c1cc(ccc1C/C=N/O)/C(=O)OC[C@@H]([C@@H](COC(=O)/C(=N\O)/Cc1ccc(cc1)O)O)O)O</chem>                                                                                                                                                                                         | -7   | <i>Aspergillus aculeatus</i> CRI323-04A    |
| 404 | M404 | <chem>c1(cc2c(c1)[OH+]C(=CC2=O)CCCCC)CC(=O)OC)O</chem>                                                                                                                                                                                                                         | -7   | <i>Pestalotiopsis</i> sp.                  |
| 405 | M405 | <chem>c1(cc2c(c1)[OH+]C(=CC2=O)CCCC[C@@H](C)O)CC(=O)OC)O</chem>                                                                                                                                                                                                                | -7   | <i>Pestalotiopsis</i> sp.                  |
| 406 | M406 | <chem>c1(cc2c(c1)[OH+]C(=CC2=O)CCCC[C@@H](C)O)CC(=O)OCC)O</chem>                                                                                                                                                                                                               | -7   | <i>Pestalotiopsis</i> sp.                  |
| 407 | M407 | <chem>CC(=C1C(=O)/C=C\2/C=CC[C@H](C)O2)/C(=N1)O)C</chem>                                                                                                                                                                                                                       | -6.9 | <i>Cladosporium</i> sp. OUCMDZ-1635        |
| 408 | M408 | <chem>c1(ccc(cc1)O)C[C@@H](N(C=O)[C@@H](NC(=O)C)[C@@H](CC)C)C(=O)N[C@H](C(=O)O)CC(C)C</chem>                                                                                                                                                                                   | -6.9 | <i>Simplicillium obclavatum</i> EIODSF 020 |

|     |      |                                                                                                                                                                           |      |                                            |
|-----|------|---------------------------------------------------------------------------------------------------------------------------------------------------------------------------|------|--------------------------------------------|
| 409 | M409 | c1(ccc(cc1)O)C[C@@H](N(C=O)[C@@H](NC(=O)C)[C@@H](CC)C)C(=O)N[C@@H](C(=O)OC)CC(C)C                                                                                         | -6.9 | <i>Simplicillium obclavatum</i> EIODSF 020 |
| 410 | M410 | c1c(ccc(c1)C[C@@H]1[C@@H](C)N=C(N=C1)Cc1ccc(cc1)OC)OC                                                                                                                     | -6.9 | <i>Eurotium</i> sp. SCSIO F452             |
| 411 | M411 | C[C@H]1/C=C/C(=O)O[C@H](C)[C@@H](CO[C@H]2[C@@H]([C@@H]([C@@H]([C@@H](C)O2)O)OC)OC)[C@H]2[C@H](/C=C/C(=O)[C@](C)(C[C@H](C)[C@H]1O[C@H]1[C@@H]([C@H](C[C@@H](C)O1)OC)O)O)O2 | -6.9 | <i>Streptomyces</i> sp. HK-2006-1          |
| 412 | M412 | C1(=O)[C@@]([C@@H]2[C@@](C1)(CC(=O)C(=CC2)C)C)(C(C)C)O                                                                                                                    | -6.9 | <i>Trichoderma virens</i>                  |
| 413 | M413 | [C@]12(CC[C@]3([C@H]([C@@H]1[C@@H]1[C@]([C@H]4C(=C(CC4)C(=O)O)C2)(C1)C)[C@H](CC3)C(C)C)CO                                                                                 | -6.9 | <i>Aspergillus</i> sp. 16-5c               |
| 414 | M414 | c1(cc(c2c(c1)OCc1c2nc(cc1)C)C(=O)OC)O                                                                                                                                     | -6.9 | <i>Phomopsis</i> sp. 33                    |
| 415 | M415 | c1(cc(c2c(c1)CC(=O)O[C@H](CCCC2=O)C[C@H](C)O)O)O                                                                                                                          | -6.9 | <i>Penicillium Sumatrense</i>              |
| 416 | M416 | c1(cc(c2c(c1)CC(=O)O[C@@H](CCCC2=O)C[C@H](C)O)O)O                                                                                                                         | -6.9 | <i>Penicillium Sumatrense</i>              |
| 417 | M417 | C12=C(C[C@@H]3[C@]4(C=C1)C[C@@]1([C@@H]5[C@]4([C@@]([C@@H]([O[C@@H]5OC1=O)C)(O3)O)C(=O)OC)C)C(OC(=O)C2)(C)C                                                               | -6.9 | <i>Penicillium</i> sp. 303                 |
| 418 | M418 | c1cccc(c1C(=O)O)N/C=N/c1occc1                                                                                                                                             | -6.9 | <i>Penicillium paneum</i> SD-44            |
| 419 | M419 | C=C[C@H]1CC[C@@]2([C@@H]3CC[C@H](C)(C)C3=C(C(=O)C2=C1)O)O)O                                                                                                               | -6.9 | <i>Eutypella scoparia</i> FS26             |
| 420 | M420 | CC(C)[C@H]1[C@@H]2[C@H](C)C(=C[C@@H]3/C=C(/)CCCC(=O)C[C@H](C(=O)[C@@]23C(=N1)O)SC)C                                                                                       | -6.9 | <i>Aspergillus</i> sp.                     |
| 421 | M421 | c1(ccccc1)CCOC(=O)[C@H]1NC(=O)CC1                                                                                                                                         | -6.9 | <i>Aspergillus versicolor</i> ZBY-3        |
| 422 | M422 | c1c(cc2c(c1O)C(=O)C1=C([OH+])2)C=C[C@H]([C@H]1C(=O)OC)O)CO                                                                                                                | -6.9 | <i>Engyodontium album</i> DFFSCS021        |
| 423 | M423 | [C@@H]12[C@@H]([C@]3([C@H]4[C@]([C@@H]1O2)(C1=CC(=C)OCC1=C[C@@H]4OC3=O)C)C)O                                                                                              | -6.9 | <i>Aspergillus dimorphicus</i> SD317       |
| 424 | M424 | C1=C[C@]2([C@H]3[C@]([C@@H]1O)(C1=CC(=O)OCC1=C[C@H]3OC2=O)C)C                                                                                                             | -6.9 | <i>Aspergillus wentii</i> EN-48            |
| 425 | M425 | CC1(C)[C@@H](C(=O)O)N2C(=O)[C@H]([C@H]2S1)/N=C(/Cc1cccc1)\O                                                                                                               | -6.9 | <i>Penicillium mold</i>                    |
| 426 | M426 | C[C@H]1CC(=O)C/C=C/[C@@H]2CCC[C@H]2[C@@H](/C=C/C(=O)O1)O                                                                                                                  | -6.9 | <i>Penicillium</i> sp. PSU-F44             |
| 427 | M427 | O=C1N2[C@H](C(=O)N[C@H]1Cc1cccc1)CCC2                                                                                                                                     | -6.9 | <i>Cladosporium</i> sp. F14                |
| 428 | M428 | C[C@@H]1CCC/C=C\C[C@]2(CC(=O)c3c(cc(cc3O2)O)CC(=O)O1)O                                                                                                                    | -6.9 | <i>Curvularia</i> sp. 768                  |
| 429 | M429 | c1(cc(c2c(c1)[OH+]C(=CC2=O)CCCCC)CC(=O)OCC)O                                                                                                                              | -6.9 | <i>Pestalotiopsis</i> sp.                  |
| 430 | M430 | c1(cc(c2c(c1)[OH+]C(=CC2=O)CCCC)CC(=O)OC)O                                                                                                                                | -6.9 | <i>Pestalotiopsis</i> sp.                  |
| 431 | M431 | [C@H](CCCCCCCCCCCC)([C@@H]1OC(=O)[C@H](NC(=O)CN(C(=O)/C=C/C(=C)NC(=O)[C@H]1C)C)[C@@H](C(=O)N)O)C                                                                          | -6.8 | <i>Micromonospora chalcea</i> FIM 02-523   |
| 432 | M432 | C1C(=O)[C@@H]([C@@]2([C@H]1[C@H](C1=C2CC(C1=O)(C)C)O)C)C                                                                                                                  | -6.8 | <i>Chondrostereum</i> sp.                  |
| 433 | M433 | [C@]12([C@@]3(C[C@H](CC1)C([C@@]3(O)C)(C)C)[C@@H](C[C@@H]2C)O)O                                                                                                           | -6.8 | <i>Streptomyces</i> sp. SCSIO 10355        |
| 434 | M434 | C1CC([C@]2([C@](C1)(C1=C([C@@H](C2=O)O)[C@H]([C@](CC1)(C=C)C)O)C)O)(C)C                                                                                                   | -6.8 | <i>Eutypella scoparia</i> FS26             |
| 435 | M435 | C1CC([C@H]2[C@]3(C1)[C@@]1([C@@](CC2=O)([C@H]([C@](CC1)(C=C)C)O)OC3=O)O)(C)C                                                                                              | -6.8 | <i>Aspergillus wentii</i> SD-310           |

|     |      |                                                                                                                                                                                                                                  |      |                                          |
|-----|------|----------------------------------------------------------------------------------------------------------------------------------------------------------------------------------------------------------------------------------|------|------------------------------------------|
| 436 | M436 | C1CC(C2=CC(=O)C3=C([C@@]2(C1)O)CC[C@@]([C@@H]3O)(C=C)C)(C)C                                                                                                                                                                      | -6.8 | <i>Aspergillus wentii</i> SD-310         |
| 437 | M437 | C1CC(C2=CC(=O)C3=C([C@]2(C1)O)CC[C@@]([C@@H]3O)(C=C)C)(C)C                                                                                                                                                                       | -6.8 | <i>Aspergillus wentii</i> SD-310         |
| 438 | M438 | [C@@]12([C@H]3[C@](CC[C@H]1[C@@]1(OC(=O)[C@H]([C@H]2O)C1)C)([C@@]12[C@@](C(=O)[C@@](C3)(C)C2=C)O)[C@H](C)OC1=O)C                                                                                                                 | -6.8 | <i>Penicillium brasilianum</i>           |
| 439 | M439 | [C@@H]1(CC[C@H](O[C@@H]1C)O[C@H]1[C@](C[C@H](O[C@@H]1C)O[C@H]1[C@@H]([C@H](O[C@H](C1)c1c(c2c(cc1)C(=O)C1=C(C2=O)[C@@H]([C@@H]([C@@]2([C@]1([C@H](C=C([C@H]2O)C)O[C@H]1O[C@H]([C@H]([C@@H](C1)OC)O)C)O)CC(=O)C)O)C)O)(O)C)OC(=O)N | -6.8 | <i>Streptomyces pratensis</i> NA-ZhouS1  |
| 440 | M440 | c1(cc(c2c(c1C=O)O[C@](C=C2)(CC/C=C/C)\CC[C@@H](O)C(C)(O)C)O)CO C(=O)C                                                                                                                                                            | -6.8 | <i>Stachybotrys chartarum</i> 952        |
| 441 | M441 | c1cccc(c1C(=O)O)N/C(=N)CC(C)(C)O)/C                                                                                                                                                                                              | -6.8 | <i>Penicillium paneum</i> SD-44          |
| 442 | M442 | Cc1cc(c(C)c(c1)O[C@@H]1C(=O)C(=C(C(=O)[C@@]1(C)OC)O)C)O                                                                                                                                                                          | -6.8 | <i>Aspergillus aculeatus</i>             |
| 443 | M443 | CC[C@H](CC(=O)C(C)C)[C@H](C)c1ccc(cc1)[N](=O)O                                                                                                                                                                                   | -6.8 | <i>Nocardia</i> sp. ALAA 2000            |
| 444 | M444 | C[C@H]1C[C@H](C/C=C/[C@@H]2CCC[C@H]2[C@@H]/C=C/C(=O)O1)O)O                                                                                                                                                                       | -6.8 | <i>Penicillium</i> sp. PSU-F44           |
| 445 | M445 | C1[C@H](C=C2[C@H]([C@H]1OC(=O)C(CC)(C)C)[C@H]([C@H](C=C2)C)CC[C@@H]1C[C@H](CC(=O)O1)O)C                                                                                                                                          | -6.8 | <i>Aspergillus terreus</i>               |
| 446 | M446 | C1(=C(C=C([OH+]C1=O)/C=C/[C@@H](CC(=O)O)C)/C)OC)CO                                                                                                                                                                               | -6.8 | <i>Petriella</i> sp.                     |
| 447 | M447 | c1(c(c2c(cc1C)C(=O)C[C@H](O2)/C=C/C)C)O                                                                                                                                                                                          | -6.7 | <i>Aspergillus</i> sp.                   |
| 448 | M448 | c1c(c2c(c1O)C)[C@H]([C@@H](OC2=O)C)C)O                                                                                                                                                                                           | -6.7 | <i>Aspergillus</i> sp.                   |
| 449 | M449 | [C@H](CCCCCCCCCCCC)[C@@H]1OC(=O)[C@H](NC(=O)CN(C(=O)/C=C/C(=C)NC(=O)[C@H]1C)C)[C@@H](C(=O)N)O)C                                                                                                                                  | -6.7 | <i>Micromonospora chalcea</i> FIM 02-523 |
| 450 | M450 | [C@H](CCCCCCCCCCCC)[C@@H]1OC(=O)[C@H](NC(=O)CN(C(=O)/C=C/C(=C)NC(=O)[C@H]1C)C)[C@@H](C(=O)N)O)C                                                                                                                                  | -6.7 | <i>Micromonospora chalcea</i> FIM 02-523 |
| 451 | M451 | C(=O)([C@H](CSc1ccc[n+]2c1[C@]([C@H]([C@@H]2/C=C(\C)/C=C/C1CC1)O)(C)O)CC(=O)C)O                                                                                                                                                  | -6.7 | <i>Streptomyces</i> sp. HZP-2216E        |
| 452 | M452 | C1(=C[C@@]2([C@]3(N(C1=O)CC(=O)N3)[N@H+]([C@@H]1[C@@H]2C=CC=C1)O)C(C=C)(C)C)OC                                                                                                                                                   | -6.7 | <i>Aspergillus versicolor</i> LZD-14-1   |
| 453 | M453 | C1=C2[C@@]([C@H](C1=O)C)([C@]1(C=C2)C(=O)C(C1)(C)C)O)C                                                                                                                                                                           | -6.7 | <i>Chondrostereum</i> sp.                |
| 454 | M454 | C1(=O)C=C([C@@H]2[C@]1([C@H]([C@@H]1[C@H]2CC(C1)(C)C)O)C)C                                                                                                                                                                       | -6.7 | <i>Chondrostereum</i> sp.                |
| 455 | M455 | [C@@H]1([C@@]([C@@H]2[C@@](C1)(CC=C(CC2)C(=O)O)C)(C(C)C)O)O                                                                                                                                                                      | -6.7 | <i>Trichoderma virens</i>                |
| 456 | M456 | [C@@]12(CC[C@]3([C@H]([C@@H]1CC(=C1[C@@H]([C@H]2O)[C@H](CC1)C)C)CC(CC3)(C)C)C                                                                                                                                                    | -6.7 | <i>Aspergillus</i> sp. 085242            |
| 457 | M457 | [C@@]12(CC[C@]3([C@H]([C@@H]1CC(=C1[C@@H]([C@H]2O)[C@H]([C@@H](C1)O)C)C)CC(CC3)(C)C)C                                                                                                                                            | -6.7 | <i>Aspergillus</i> sp. 085242            |
| 458 | M458 | c1(cc(c2c(c1C=O)O[C@](C=C2)(CC/C=C/C)\CC[C@@H](O)C(C)(O)C)O)C                                                                                                                                                                    | -6.7 | <i>Stachybotrys chartarum</i> 952        |
| 459 | M459 | c1c(cc(c1O)C(=O)O)c1cc(c(cc1C)O)O)OC                                                                                                                                                                                             | -6.7 | <i>Streptomyces olivaceus</i>            |
| 460 | M460 | c1c(cc(cc1O)c1cc(c(cc1C)O)O)OC                                                                                                                                                                                                   | -6.7 | <i>Streptomyces olivaceus</i>            |





|     |      |                                                                                                                            |      |                                                                                  |
|-----|------|----------------------------------------------------------------------------------------------------------------------------|------|----------------------------------------------------------------------------------|
| 483 | M483 | C1C[C@@H]([C@@H]2[C@@H](C1=C)[C@@H](CC(=C2)C(=O)O)O)C(C)C                                                                  | -6.6 | <i>Cochliobolus lunatus</i><br>SCSIO41401                                        |
| 484 | M484 | C1CC(C2=C(C(=O)C3=C[C@](CC[C@@]3([C@]2(C1)C)O)(C=C)C)O)(C)C                                                                | -6.6 | <i>Eutypella scoparia</i> FS26                                                   |
| 485 | M485 | C1CC([C@]2([C@]3(C1)C1=C([C@H]([C@]2(OC3)O)O)[C@H]([C@](CC1)(C=C)C)O)O)(C)C                                                | -6.6 | <i>Eutypella scoparia</i> FS26                                                   |
| 486 | M486 | C1[C@@H](C([C@H]2[C@](C1)(C1=C(C(=O)C2)C[C@](C[C@@H]1O)(C=C)C)C)(C)O                                                       | -6.6 | <i>Aspergillus wentii</i> SD-310                                                 |
| 487 | M487 | C1/C=C/[C@H](C/C=C/[C@H](CC(=O)O[C@@H]1C)O)O                                                                               | -6.6 | <i>Dendrodochium</i> sp.                                                         |
| 488 | M488 | C1C(=C[C@]2(C1)[C@@H]1[C@H](CC[C@@H]2C)[C@@H](C(=O)O1)C)CO                                                                 | -6.6 | <i>Penicillium</i> sp. FJ-1                                                      |
| 489 | M489 | O1C(=O)c2c([C@@H]1CCCCC)c(c(c2)O)O                                                                                         | -6.6 | <i>Acremonium strictum</i>                                                       |
| 490 | M490 | C=C[C@]1(C)C=C2C(=O)[C@@]3([C@]4(C(C)C)CCC[C@]4(CO3)[C@]2([C@@H](C1)O)O)O                                                  | -6.6 | <i>Eutypella scoparia</i> FS26                                                   |
| 491 | M491 | c1c(cc2c(c1O)C(=O)C1=C([OH+]2)CC[C@H]1OC)C                                                                                 | -6.6 | The the diethyl sulfate (DES) mutagenesis of <i>Penicillium purpurogenum</i> G59 |
| 492 | M492 | Cc1cc(c(C)c2c1C(=O)[C@]1(C(=O)C(=C(C(=O)[C@@]1(C)OC)O)C)O2)O                                                               | -6.6 | <i>Aspergillus aculeatus</i>                                                     |
| 493 | M493 | c1(cc(c2c3c1COC(=O)c3c(cc2C)O)O)O                                                                                          | -6.6 | The the diethyl sulfate (DES) mutagenesis of <i>Penicillium purpurogenum</i> G59 |
| 494 | M494 | CC1(C)C[C@@H]2[C@H](C1)[C@@H]([C@@]1(C)CCC(=C21)C(=O)O)O                                                                   | -6.6 | <i>Chondrostereum</i> sp.                                                        |
| 495 | M495 | [C@H]1(C[C@]2([C@H]3[C@](C1)(C1=CC(=O)OCC1=C[C@H]3OC2=O)C)C)O                                                              | -6.6 | <i>Aspergillus dimorphicus</i> SD317                                             |
| 496 | M496 | c1c(cc2c1C=C(C(=O)[OH+]2)[C@@H]([C@@H](C)O)OC)OC                                                                           | -6.6 | <i>Pestalotiopsis</i> sp.                                                        |
| 497 | M497 | c1c(cc2c1C=C(C(=O)[OH+]2)C[C@@H](CO)OC)OC                                                                                  | -6.6 | <i>Pestalotiopsis</i> sp.                                                        |
| 498 | M498 | c1c(cc2c1C=C(C(=O)[OH+]2)C[C@@H](CO)O)OC                                                                                   | -6.6 | <i>Pestalotiopsis</i> sp.                                                        |
| 499 | M499 | c1cc(c(cc1)NC[C@]1([C@H]([C@@H]([C@H](O1)CO)O)OC)C(=O)O                                                                    | -6.5 | <i>Streptomyces</i> sp. CMN-62                                                   |
| 500 | M500 | c1(cc(c(cc1)[C@](CCCC(C)C)O)O)CO                                                                                           | -6.5 | <i>Aspergillus</i> sp.                                                           |
| 501 | M501 | C1[C@@H](C(C2=C(C(=O)C3=C[C@](C[C@H]([C@@]3([C@]2(C1)C)O)O)(C=C)C)O)(C)C)O                                                 | -6.5 | <i>Eutypella scoparia</i> FS26                                                   |
| 502 | M502 | C1CC([C@H]2[C@]3(C1)C1=C([C@H]([C@@H]2O)O)[C@H]3OC)[C@H]([C@](CC1)(C=C)C)O)(C)C                                            | -6.5 | <i>Aspergillus wentii</i> SD-310                                                 |
| 503 | M503 | [C@@H]1(C([C@H]2[C@](C[C@@H]1O)([C@@]1([C@@H](CC2)O)c2c(C1)c(cc2C=O)CO)O)C)C)OC(=O)C                                       | -6.5 | <i>Stachybotrys chartarum</i> 952                                                |
| 504 | M504 | CC(C)CC1=NC=C([C@H](C(C)O)[N+](C1=O)O                                                                                      | -6.5 | Fungus strain CF07002                                                            |
| 505 | M505 | C(=O)([C@@H](/C=C/CCCCCCCC)O)N[C@@H](CO[C@@H]1O[C@@H]([C@H]([C@@H]([C@H]1O)O)O)CO)[C@@H](/C=C/CC/C=C/CCCCCCCC)C)O          | -6.5 | <i>Paecilomyces lilacinus</i> ZBY-1                                              |
| 506 | M506 | CC[C@@H](C)C[C@H](/C=C/C)\[C@@H]([C@H](C)/C=C/C)\[C@@H]([C@H](C)/C=C/[C@@H]([C@H](C)/C=C/[C@@H]([C@H](C)/C=C/C)\C=O)O)O)CO | -6.5 | <i>Pestalotiopsis clavispora</i>                                                 |
| 507 | M507 | CCCCC/C(=C/C(=O)/C=C\1/O[C@@H](C(=O)N1)CCCC)/C                                                                             | -6.5 | <i>Marinispora</i> strain NPS008920                                              |

|     |      |                                                                                                                                   |      |                                     |
|-----|------|-----------------------------------------------------------------------------------------------------------------------------------|------|-------------------------------------|
| 508 | M508 | <chem>C1(=C(C(=O)[OH+]C(=C1)/C=C/[C@@H](CCCC(=O)O)C)/C)CO)OC</chem>                                                               | -6.5 | <i>Petriella</i> sp.                |
| 509 | M509 | <chem>C1CC[C@@H]2[C@@H](C1)[C@@H]([C@@H]([NH2+])2)C(C)(C=C)C(=O)N</chem>                                                          | -6.4 | <i>Eurotium</i> sp. SCSIO F452      |
| 510 | M510 | <chem>c1c(cc2c(c1O)CN(C2=O)CCCC(=O)OC)O</chem>                                                                                    | -6.4 | <i>Diaporthe phaseolorum</i> SKS019 |
| 511 | M511 | <chem>C1(C[C@@H]2/C=C/C=C\C@@)(C[C@@H]([C@@]12O)OC(=O)C(C)O)/CO)(C)C</chem>                                                       | -6.4 | <i>Hansfordia sinuosae</i>          |
| 512 | M512 | <chem>c1(cc(c(cc1)[C@@]1(C)OC(CCC1)(C)C)O)CO</chem>                                                                               | -6.4 | <i>Aspergillus</i> sp.              |
| 513 | M513 | <chem>[C@@H]1([C@@]([C@@H]2[C@@](C1)(CC(=O)[C@]1([C@@H](C2)O1)C)C)(C(C)C)O)O</chem>                                               | -6.4 | <i>Trichoderma virens</i>           |
| 514 | M514 | <chem>C1[C@@H](C(C2=C(C(=O)C3=C[C@@](CC[C@@]3([C@]2(C1)C)O)(C=C)C)O)(C)C)O</chem>                                                 | -6.4 | <i>Eutypella scoparia</i> FS26      |
| 515 | M515 | <chem>C1=C[C@]2([C@@H](C(C1=O)(C)C)[C@H]([C@@H](C1=C[C@](CC[C@]21O)(C=C)C)O)O)C</chem>                                            | -6.4 | <i>Eutypella</i> sp. FS46           |
| 516 | M516 | <chem>C1[C@@H](C([C@H]2[C@](C1)(C1=C(C(=O)C2)[C@H]([C@](CC1)(C=C)C)OC(=O)C)(C)C)O</chem>                                          | -6.4 | <i>Aspergillus wentii</i> SD-310    |
| 517 | M517 | <chem>c1c(cc(c(c1O)C(=O)O)c1c2c(c(cc1C)O)ncs2)OC</chem>                                                                           | -6.4 | <i>Alternaria</i> sp.               |
| 518 | M518 | <chem>c1c(cc(c(c1C(=O)O)C(=O)c1c(ccc1O)O)O)C</chem>                                                                               | -6.4 | <i>Penicillium</i> sp. ZJ-SY2       |
| 519 | M519 | <chem>c1c(cc(c(c1C(=O)OC)C(=O)c1c(ccc1O)O)O)C</chem>                                                                              | -6.4 | <i>Penicillium</i> sp. ZJ-SY2       |
| 520 | M520 | <chem>C(=O)(CC[C@@]1([C@H](CCc2c(c(cc12)O)C)C=C)C(=C)C)OC</chem>                                                                  | -6.4 | Endophytic fungus J3                |
| 521 | M521 | <chem>C=C[C@@]1(C)CC[C@]2(C(=C1)C(=O)C(=C1C)(C)CC[C@H]([C@]21C)O)O</chem>                                                         | -6.4 | <i>Eutypella scoparia</i> FS26      |
| 522 | M522 | <chem>C(=O)(C)O[C@H]1[C@H]2O[C@H]2C2=CC(=O)[C@]3(C[C@@]2([C@H]1C)C)O[C@]3(C)CO</chem>                                             | -6.4 | <i>Penicillium</i> sp. PR19 N-1     |
| 523 | M523 | <chem>C1CC([C@]2([C@]3(C1)[C@@H]1C(=C[C@@](CC1=O)(C)C=C)C(=O)[C@]2(O)OC3)O)(C)C</chem>                                            | -6.4 | Fungal strain HS-1                  |
| 524 | M524 | <chem>C1CC([C@]2([C@]3(C1)[C@@]1(C(=C[C@@](C[C@H]1O)(C)C=C)C(=O)[C@]2(O)OC3)O)O)(C)C</chem>                                       | -6.4 | Fungal strain HS-1                  |
| 525 | M525 | <chem>c1(cc(c2c(c1)[OH+]C1=C(C2=O)C[C@H]([C@@]1(O)C(=O)OC)SC[C@@H](C(=O)OC)O)O)C</chem>                                           | -6.4 | <i>Penicillium purpurogenum</i> G59 |
| 526 | M526 | <chem>C(=O)([C@@H](/C=C/CCCCCCCCCCCC)N[C@@H](CO[C@@H]1O[C@@H]([C@H]([C@@H]([C@H]1O)O)O)O)[C@@H](/C=C/CC/C=C(/CCCCCCCC)\C)O</chem> | -6.4 | <i>Paecilomyces lilacinus</i> ZBY-1 |
| 527 | M527 | <chem>C(CCCCC/C=C/C(=O)/C=C\1/O[C@@H](C(=O)N1)CCCC)/C)C</chem>                                                                    | -6.4 | <i>Marinispora</i> strain NPS008920 |
| 528 | M528 | <chem>OC[C@@H]1O[C@H](C[C@H]1O)[N+]1C(=O)NC(=O)C(=C1)C</chem>                                                                     | -6.3 | <i>Aspergillus</i> sp.              |
| 529 | M529 | <chem>[C@@H]1(C[C@@H]([C@H]2[C@]([C@@H]1O)(CC[C@](C2)(C(=C)C)O)C)O</chem>                                                         | -6.3 | <i>Penicillium</i> sp. J-54         |
| 530 | M530 | <chem>[C@@H]1(C[C@@H]([C@]2([C@]([C@@H]1O)(CC[C@H](C2)C(=C)C)O)C)O</chem>                                                         | -6.3 | <i>Penicillium</i> sp. J-54         |
| 531 | M531 | <chem>[C@@H]1([C@@]([C@@H]2[C@@](C1)(C[C@H](C(=C)CC2)O)C)(C(C)C)O)O</chem>                                                        | -6.3 | <i>Trichoderma virens</i>           |
| 532 | M532 | <chem>C(/C=C/C(C)C)OC[C@]([C@@H]1CC[C@@]([C@H]1C)(C)O)(O)C</chem>                                                                 | -6.3 | <i>Trichoderma harzianum</i> X-5    |
| 533 | M533 | <chem>[C@@H]1([C@@H]([C@](CC1)(C)O)C)[C@](CCC[C@@H](C)C(=O)OC)(C)O</chem>                                                         | -6.3 | <i>Trichoderma harzianum</i> X-5    |
| 534 | M534 | <chem>C1CC(C2=CC(=O)C3=C([C@]2(C1)O)CC[C@@]([C@H]3O)(C=C)C)C)C</chem>                                                             | -6.3 | <i>Aspergillus wentii</i> SD-310    |

|     |      |                                                                                                                    |      |                                            |
|-----|------|--------------------------------------------------------------------------------------------------------------------|------|--------------------------------------------|
| 535 | M535 | [C@@]12([C@H]3[C@](CC[C@@H]1[C@@]1(OC(=O)[C@H]([C@H]2O)C1)C)([C@@]1(C(=O)[C@@](C(=O)[C@@](C3)(C)C1=C(C)O)C(=O)OC)C | -6.3 | <i>Penicillium brasilianum</i>             |
| 536 | M536 | C1[C@H]2[C@H]([C@H](C/C=C/[C@H](CC(=O)O[C@@H]1C)O)O)O2                                                             | -6.3 | <i>Dendrodochium</i> sp.                   |
| 537 | M537 | C1[C@H](C[C@H](C/C=C/[C@H](CC(=O)O[C@@H]1C)O)O)O                                                                   | -6.3 | <i>Dendrodochium</i> sp.                   |
| 538 | M538 | c1(cc(cc1)C[C@H](OC(=O)C[C@@H](C)O)C)O                                                                             | -6.3 | <i>Hansfordia sinuosae</i>                 |
| 539 | M539 | c1(ccc(cc1)CCO)OC[C@@H](O)C(C)C)O                                                                                  | -6.3 | <i>Penicillium</i> sp.FJ-1                 |
| 540 | M540 | c1(c(c(cc1)O)O)C(=O)CCCCC)CC(=O)OC                                                                                 | -6.3 | <i>Dothiorella</i> sp.                     |
| 541 | M541 | c1ccc2c(c1)c(C)[nH+]c([nH]2)[C@@H](C)O                                                                             | -6.3 | <i>Penicillium commune</i> SD-118          |
| 542 | M542 | CC(C)CC1=CN=C(CC(C)C)C(=O)[N+]1O                                                                                   | -6.3 | marine-derived fungus strain CF07002       |
| 543 | M543 | c1cc2[C@H](CCC(=O)c2c(c1)O)O                                                                                       | -6.3 | <i>Aspergillus fumigatus</i>               |
| 544 | M544 | O=C1/C=C\C[C@@H](OC)/C=C\CCC[C@H](C)OC(=O)/C=C/1                                                                   | -6.3 | <i>Pestalotiopsis microspore</i>           |
| 545 | M545 | c1c(cc(c2c1C=C(C(=O)[OH+])2)C[C@@H](C)O)OC)OC                                                                      | -6.3 | <i>Pestalotiopsis</i> sp.                  |
| 546 | M546 | C([C@H]1NC(=O)[C@H](NC1=O)Cc1ccc(cc1)O)C(C)C                                                                       | -6.2 | <i>Aspergillus</i> sp.                     |
| 547 | M547 | c1(c(c2c(c1)O)C)[C@@H]([C@H](OC2)C)C)O)C(=O)O                                                                      | -6.2 | <i>Aspergillus</i> sp.                     |
| 548 | M548 | C1(=O)C[C@H]([C@@H]2[C@@]34C(=C(C(=O)CC[C@@H]1C)C(=O)O3)O[C@@]([C@H](C4)C)([C@H]2O)C)O                             | -6.2 | <i>Streptomyces koyangensis</i> SCSIO 5802 |
| 549 | M549 | c1(ccc(cc1)O)C[C@@H](N(C(=O)[C@@H](NC(=O)C)[C@@H](CC)C)C)C(=O)O                                                    | -6.2 | <i>Simplicillium obclavatum</i> EIODSF 020 |
| 550 | M550 | C1(=C[C@@]2([C@]3(N(C1=O)CC(=O)N3)[N+H+])([C@@H]1[C@@H]2C=CC=C1)OC)C(C=C)C)OC                                      | -6.2 | <i>Aspergillus versicolor</i> LZD-14-1     |
| 551 | M551 | c1c(cc2c(c1)O)CN(C2=O)CCO)O                                                                                        | -6.2 | <i>Diaporthe phaseolorum</i> SKS019        |
| 552 | M552 | [C@@]12([C@H]([C@@]3([C@](C[C@@H]1OC(=O)C)([C@H](C=C3)O)C)CO)CC2(C)C)O                                             | -6.2 | <i>Hansfordia sinuosae</i>                 |
| 553 | M553 | [C@@H]1(C[C@@H]([C@H]2[C@]([C@@H]1O)(CC[C@H](C2)C(=C)C)C)O                                                         | -6.2 | <i>Penicillium</i> sp. J-54                |
| 554 | M554 | [C@@H]12C[C@@]([C@@H]3[C@](C1)([C@H](C[C@H]3O)C)CC=C2)C)O                                                          | -6.2 | <i>Penicillium bilaiae</i> MA-267          |
| 555 | M555 | C1[C@H]([C@H]2C(C=C1)CC/C=C/[C@@H](C/C(=C/2)/C)OC)/C(C)C)O                                                         | -6.2 | <i>Trichoderma harzianum</i> X-5           |
| 556 | M556 | C1[C@@H](CC(=O)C/C=C/[C@H](CC(=O)O[C@@H]1C)O)O                                                                     | -6.2 | <i>Dendrodochium</i> sp.                   |
| 557 | M557 | C1/C=C/[C@@H](C/C=C/[C@H](CC(=O)O[C@@H]1C)O)O                                                                      | -6.2 | <i>Dendrodochium</i> sp.                   |
| 558 | M558 | C1=C([OH+]c2c(C1=O)c(cc2[C@@H](OC)C[C@H](C(=O)O)OC)OC)OC)C                                                         | -6.2 | <i>Rhytidhysteron rufulum</i>              |
| 559 | M559 | [C@H]12C(=C[C@H]([C@H](O1)/C=C/C)O)C(=O)O[C@H]2/C=C/C                                                              | -6.2 | <i>Acremonium Strictum</i>                 |
| 560 | M560 | c1cccc(c1C(=O)O)/N=C/C(=O)C)\C                                                                                     | -6.2 | <i>Penicillium paneum</i> SD-44            |
| 561 | M561 | C[C@H]1C[C@@H]([C@@H]2[C@@](C)(C(=O)CCO)[C@@](C)(C=C[C@]2(C1)O)O)O                                                 | -6.2 | <i>Aspergillus sulphureus</i> KMM 4640     |
| 562 | M562 | Br/C=C/C#CCCCC/C=C/C#CCCCC(=O)N[C@@H](CC)N                                                                         | -6.2 | <i>Xestospongia</i> sp.                    |
| 563 | M563 | C1[C@H]([C@@H](C[C@@]2([C@H](C[C@H](C=C12)O)C)C(=C)C)O                                                             | -6.2 | <i>Penicillium</i> sp. PR19 N-1            |
| 564 | M564 | C1=C([OH+]c2c(C1=O)c(cc2[C@@H](OC)C[C@H](C(=O)OC)OC)OC)OC)C                                                        | -6.2 | <i>Rhytidhysteron rufulum</i>              |
| 565 | M565 | CN1/C(=C/c2cccc2)/C(=O)N(C)[C@@](CO)(C1=O)SC                                                                       | -6.2 | Pleosporales strain CRIF2                  |
| 566 | M566 | c1(c(c(cc1)O)O)C(=O)CCCC[C@@H](C)O)CC(=O)OC                                                                        | -6.2 | <i>Pestalotiopsis</i> sp.                  |

|     |      |                                                                                                                                                                                    |      |                                                  |
|-----|------|------------------------------------------------------------------------------------------------------------------------------------------------------------------------------------|------|--------------------------------------------------|
| 567 | M567 | c1(c(c(cc(c1)O)O)C(=O)CCCCCCC)CC(=O)OC                                                                                                                                             | -6.2 | <i>Pestalotiopsis</i> sp.                        |
| 568 | M568 | C1(=O)N[C@@H](C(=O)N2[C@H]1CCC2)[C@@H](CC)C                                                                                                                                        | -6.1 | <i>Aspergillus</i> sp.                           |
| 569 | M569 | c1(C)c(c(C(=O)O)c(O)cc1[C@H]([C@H](O)C)O                                                                                                                                           | -6.1 | <i>Aspergillus</i> sp.                           |
| 570 | M570 | C1(=O)[C@@H]([C@H](C)CC)NC(=O)[C@@H](NC(=O)[C@H](NC(=O)[C@@H]<br>(NC(=O)[C@H](NC(=O)[C@H](NC(=O)C[C@H](OC(=O)[C@H](N1)[C@H](CC)C)<br>CCCCCCCCCCCC)CCC(=O)OC)CC(C)C)CC(C)C)CC(=O)OC | -6.1 | <i>Bacillus</i> sp. 176                          |
| 571 | M571 | [C@@H]1([C@@]([C@@H]2[C@@](C1)(CC=C(CC2)C)C(C)(C)O)O                                                                                                                               | -6.1 | <i>Trichoderma virens</i>                        |
| 572 | M572 | [C@@H]12C[C@@]([C@@H]3[C@](C1)([C@H](C[C@H]3O)C)CC=C2C)(C)OC(<br>=O)C                                                                                                              | -6.1 | <i>Penicillium bilaiae</i> MA-267                |
| 573 | M573 | [C@]123[C@H]([C@]4[C@H]([C@H](CC1)C)C(=O)C4)C[C@H]([C@@H]<br>)([C@H]2C)O)C3(C)C                                                                                                    | -6.1 | <i>Trichoderma harzianum</i> X-5                 |
| 574 | M574 | [C@H]1([C@@H](CO[C@@H]([C@H]1O)CO)NC(=O)C)O                                                                                                                                        | -6.1 | <i>Virgibacillus dokdonensis</i> MCCC<br>1A00493 |
| 575 | M575 | C1[C@H](CC(=O)C/C=C/[C@H](CC(=O)O[C@@H]1C)O)O                                                                                                                                      | -6.1 | <i>Dendrodochium</i> sp.                         |
| 576 | M576 | C1CC[C@@H](C/C=C/[C@H](CC(=O)O[C@@H]1C)O)O                                                                                                                                         | -6.1 | <i>Dendrodochium</i> sp.                         |
| 577 | M577 | C1C[C@]([C@H]2[C@](C1)([C@H](C=C)[C@H](C2)O)CC(=O)O)C(C)C(=O)O                                                                                                                     | -6.1 | <i>Aspergillus terreus</i> GX7-3B                |
| 578 | M578 | O1C(=O)/C=C\C[C@]/C=C\C[C@@H]/C=C\CC[C@@H]([C@H]1C)C)/C)OC(C)O                                                                                                                     | -6.1 | <i>Eutypella</i> sp. FS46                        |
| 579 | M579 | C(=O)(C)O[C@@H]1[C@]23[C@@H]([C@H]([C@H]([C@@H]/C=C/C1)\C)<br>O)O)[C@@H](O3)O)CC2(C)C                                                                                              | -6.1 | <i>Ascotricha</i> sp. ZJ-M-5                     |
| 580 | M580 | C1(=O)C=C(C=C([OH+])1)C[C@H](C)O)C                                                                                                                                                 | -6.1 | <i>Aspergillus</i> sp. 16-02-1                   |
| 581 | M581 | C(=O)([C@H](N(C)C(=O)[C@@H](NC(=O)C)[C@@H](CC)C)Cc1cccc1)O                                                                                                                         | -6.1 | <i>Simplicillium obclavatum</i> EIODSF<br>020e   |
| 582 | M582 | O[C@H]1/C=C\C[C@@H](OC)/C=C\CCC[C@H](C)OC(=O)/C=C/1                                                                                                                                | -6.1 | <i>Pestalotiopsis microspore</i>                 |
| 583 | M583 | c1cc(c2c(c1)C(=O)C=C([OH+])2)CO)OC                                                                                                                                                 | -6.1 | <i>Penicillium</i> sp.                           |
| 584 | M584 | C(CCCCC/C=C/C(=O)CC(=N)O[C@H](C(=O)O)CCCC)/C)C                                                                                                                                     | -6.1 | <i>Marinispora</i> strain NPS008920              |
| 585 | M585 | C[C@H](CC[C@H]1c2cccc(c2C(=O)O1)OC)O                                                                                                                                               | -6.1 | <i>Pleosporales</i> strain CRIF2                 |
| 586 | M586 | [C@@H]1(CC[C@H]2[C@](C1)([C@]([C@@H](CC2=O)C)(CO)O)C(C)O                                                                                                                           | -6.1 | <i>Aspergillus ustus</i>                         |
| 587 | M587 | c1c(cc(c2c1C=C(C(=O)[OH+])2)CO)OC)O                                                                                                                                                | -6.1 | <i>Pestalotiopsis</i> sp.                        |
| 588 | M588 | [C@H]1(NC(=O)[C@H]2N(C1=O)CCC2)CC(C)C                                                                                                                                              | -6   | <i>Aspergillus</i> sp.                           |
| 589 | M589 | C1(=O)N[C@@H](C(=O)N2[C@H]1CCC2)CC(C)C                                                                                                                                             | -6   | <i>Aspergillus</i> sp.                           |
| 590 | M590 | C1(=O)[C@@H]([C@H](C)CC)NC(=O)[C@@H](NC(=O)[C@H](NC(=O)[C@@H]<br>(NC(=O)[C@H](NC(=O)[C@H](NC(=O)C[C@H](OC(=O)[C@H](N1)[C@H](CC)C)<br>CCCCCCCCCCCC)CCC(=O)OC)CC(C)C)CC(C)C)CC(=O)OC | -6   | <i>Bacillus</i> sp. 176                          |
| 591 | M591 | c1(occc1)c1cncc(n1)C[C@@H]([C@H](CO)O)O                                                                                                                                            | -6   | <i>Jishengella endophytica</i> 161111            |
| 592 | M592 | [C@@H]1([C@@]([C@@H]2[C@@](C1)([C@@H](C=C(CC2)C)O)C)(C(C)O)O                                                                                                                       | -6   | <i>Trichoderma virens</i>                        |
| 593 | M593 | C1=CC2=CC(=O)[C@@]([C@]2([C@H](C1)C)C)(C=C)CO)O                                                                                                                                    | -6   | <i>Cochliobolus lunatus</i><br>SCSIO41401        |
| 594 | M594 | C(CC=C(C)C)[C@]([C@@H]1[C@H](C[C@@]([C@H]1C)(C)O)O)O)C                                                                                                                             | -6   | <i>Trichoderma harzianum</i> X-5                 |

|     |      |                                                                                                                                                |      |                                             |
|-----|------|------------------------------------------------------------------------------------------------------------------------------------------------|------|---------------------------------------------|
| 595 | M595 | C1CCC(=O)C/C=C/[C@H](CC(=O)O[C@@H]1C)O                                                                                                         | -6   | <i>Dendrodochium</i> sp.                    |
| 596 | M596 | C1CC[C@H](C/C=C/[C@H](CC(=O)O[C@@H]1C)O)O                                                                                                      | -6   | <i>Dendrodochium</i> sp.                    |
| 597 | M597 | C1CC[C@H](CCC[C@H](CC(=O)O[C@@H]1C)O)O                                                                                                         | -6   | <i>Dendrodochium</i> sp.                    |
| 598 | M598 | O1C(=O)[C@@H](N(C(=O)[C@H](OC(=O)[C@@H](N(C(=O)[C@H](OC(=O)[C@@H](N(C(=O)[C@H]1C(C)C)Cc1ccccc1)C(C)C)Cc1ccccc1)C(C)C)Cc1ccccc1)C(C)C)Cc1ccccc1 | -6   | <i>Fusarium</i> sp. DZ27                    |
| 599 | M599 | c1(c(c(cc1)O)O)C(=O)CCCCCCCCC(=O)OCC                                                                                                           | -6   | <i>Dothiorella</i> sp.                      |
| 600 | M600 | [C@@H]12N(C(=O)[C@@H](NC1=O)CC(C)C)CCC2                                                                                                        | -6   | <i>Aspergillus versicolor</i> ZBY-3         |
| 601 | M601 | C1=C(C2=CC(=O)C=C[C@@]2([C@H]([C@H]1OC(=O)C)C)O)Cl                                                                                             | -6   | <i>Penicillium</i> sp. PR19N-1              |
| 602 | M602 | C(=O)(c1c(cc(cc1)CCCCCCCC)O)O                                                                                                                  | -6   | <i>Lasiodiplodia</i> sp. 318                |
| 603 | M603 | CCCC[C@@H](CC)COC(=O)c1ccccc1C(=O)OC[C@H](CC)CCCC                                                                                              | -6   | <i>Cladosporium</i> sp. F14                 |
| 604 | M604 | [C@H]1(NC(=O)[C@H]2N(C1=O)C[C@@H](C2)O)CC(C)C                                                                                                  | -5.9 | <i>Aspergillus</i> sp.                      |
| 605 | M605 | c1c(c(ccc1)C(=O)OCC(C)C)C(=O)OCCCC                                                                                                             | -5.9 | <i>Aspergillus</i> sp.                      |
| 606 | M606 | C1(=O)[C@]([C@H](C=C1C)[C@@H](CC/C=C/C)O)O)O)C                                                                                                 | -5.9 | <i>Trichoderma</i> sp. HPQJ-34              |
| 607 | M607 | C1(=O)C2=C[C@@H]3[C@@]45[C@@]2(C=C(CC[C@@H]1C)O)C(=O)O4O[C@@]([C@H](C5)C)([C@H]3O)C                                                            | -5.9 | <i>Streptomyces koyangensis</i> SCSIO 5802  |
| 608 | M608 | C1(C[C@@H]2/C=C\C[C@@H](/C=C/C[C@@H]([C@@]12O)OC(=O)C\C)O)/C O)(C)C                                                                            | -5.9 | <i>Hansfordia sinuosae</i>                  |
| 609 | M609 | [C@@H]1(C[C@@H]([C@]2([C@]([C@@H]1O)(CC[C@](C2)(C=C)O)C)O)C) O                                                                                 | -5.9 | <i>Penicillium</i> sp. J-54                 |
| 610 | M610 | C1(=C[C@H]2[C@](CC1)([C@@]1([C@]O2)([C@H](C[C@H]1O)OC)CO)C)C                                                                                   | -5.9 | <i>Stachybotrys chartarum</i>               |
| 611 | M611 | [C@]123[C@H]([C@H](C(=O)C4=C1CC[C@@]([C@@H]4O)(C=C)O)[C@@]([C@@H](C[C@H]2C3)OC(=O)C)(CC(=O)C)C)C                                               | -5.9 | <i>Eutypella</i> sp. FS46                   |
| 612 | M612 | C1/C=C/C(=O)C[C@H](C[C@H](CC(=O)O[C@@H]1C)O)OC                                                                                                 | -5.9 | <i>Dendrodochium</i> sp.                    |
| 613 | M613 | C(=O)([C@@H](N(c1c(ccc1)C(=O)O)C(=O)[C@H](N(C)C(=O)[C@@H](N)C(C)C)Cc1ccccc1)CC(C)N                                                             | -5.9 | <i>Simplicillium obclavatum</i> EIODSF 020e |
| 614 | M614 | C(=O)(c1c(cc(cc1)CCCCCCCC[C@@H](C)O)O)O)OCC                                                                                                    | -5.9 | <i>Lasiodiplodia</i> sp. 318                |
| 615 | M615 | [C@@H]12[C@@H](C(=O)[C@@H](NC1=O)CC(=C)C)CCC2                                                                                                  | -5.9 | <i>Penicillium purpurogenum</i> G59         |
| 616 | M616 | C(=O)(C)O[C@@H]1[C@]23[C@@H]([C@@H]([C@H]([C@@H](/C=C\C1)/C)O)OC)[C@@H](O3)O)CC2(C)C                                                           | -5.9 | <i>Ascotricha</i> sp. ZJ-M-5                |
| 617 | M617 | [C@@H]12N(C(=O)[C@@H](NC1=O)[C@@H](CC)C)CCC2                                                                                                   | -5.9 | <i>Aspergillus versicolor</i> ZBY-3         |
| 618 | M618 | C(=O)([C@@H](CCCCCCCCCCCC)O)N[C@@H](CO[C@@H]1O[C@@H]([C@H]([C@@H]([C@H]1O)O)O)CO)[C@@H](/C=C/CC/C=C/CCCCCCCC)C)O                               | -5.9 | <i>Paecilomyces lilacinus</i> ZBY-1         |
| 619 | M619 | C(=O)([C@@H](CCCCCCCCCCCC)O)N[C@@H](CO[C@@H]1O[C@@H]([C@H]([C@@H]([C@H]1O)O)O)CO)[C@@H](/C=C/CC/C=C/CCCCCCCC)C)O                               | -5.9 | <i>Paecilomyces lilacinus</i> ZBY-1         |
| 620 | M620 | C1=C([OH+]c2c(C1=O)c(cc(c2[C@H](OC)C[C@H](C(=O)OC)OC)O)C                                                                                       | -5.9 | <i>Rhytidhysterium rufulum</i>              |
| 621 | M621 | CCCC[C@H]1c2cccc(c2(=O)O1)OC                                                                                                                   | -5.9 | Fungus strain CRIF2                         |
| 622 | M622 | C1(=O)N[C@H](C(=O)N2[C@H]1CCC2)C(C)C                                                                                                           | -5.8 | <i>Aspergillus</i> sp.                      |

|     |             |                                                                       |      |                                             |
|-----|-------------|-----------------------------------------------------------------------|------|---------------------------------------------|
| 623 | <b>M623</b> | C(C)[C@@H](C)[C@@H]1NC(=O)[C@H](NC1=O)CC(C)C                          | -5.8 | <i>Aspergillus</i> sp.                      |
| 624 | <b>M624</b> | C1(=O)[C@@H](NC(=O)[C@H]2N1CCC2)CC(C)C                                | -5.8 | <i>Aspergillus</i> sp.                      |
| 625 | <b>M625</b> | c1(cc(c2c(c1OC)C(=O)OC2)COC)C                                         | -5.8 | <i>Penicillium</i> sp. ZH58                 |
| 626 | <b>M626</b> | [C@H]1([C@H](OC(=O)C=C1)[C@H]([C@H](C)O)Cl)C)O                        | -5.8 | <i>Exophiala</i> sp.                        |
| 627 | <b>M627</b> | Cc1ccc(cc1C(=O)[C@H](C)O)O                                            | -5.8 | <i>Massarina</i> sp. CNT-016                |
| 628 | <b>M628</b> | C1[C@@H](C([C@H]2[C@](C1)([C@H]([C@@H](CC2=O)C)CO)C(C)C)O             | -5.8 | <i>Aspergillus ustus</i>                    |
| 629 | <b>M629</b> | C1(=C[C@]2([C@](CC1)([C@@]1[C[C@H](O2)C[C@H]1O)C)C)OC)C               | -5.7 | <i>Stachybotrys chartarum</i>               |
| 630 | <b>M630</b> | C1C=C(CC[C@]21[C@@H][C[C@H]([C@@H]2C)O)C(C)C)O)C                      | -5.7 | <i>Trichoderma harzianum</i> X-5            |
| 631 | <b>M631</b> | [C@H](C(=C)C(=O)O)(C(=O)O)CCCC(=O)C                                   | -5.7 | <i>Aspergillus niger</i>                    |
| 632 | <b>M632</b> | [C@H]1([C@H](C=C(C(=O)O)1)[C@@H]([C@@H](C)O)OC)O)C                    | -5.7 | <i>Aspergillus</i> sp. 16-02-1              |
| 633 | <b>M633</b> | CC[C@@H](C)[C@H](NC(=O)C)C(=O)N(C)[C@@H](Cc1ccc(O)cc1)C(=O)O          | -5.7 | <i>Simplicillium obclavatum</i> EIODSF 020e |
| 634 | <b>M634</b> | C[C@@H]1[C@H]2CC(=O)[C@@H]([C@@]31[C@H](C(=C)OC3=O)O2)O               | -5.7 | <i>Massarina</i> sp. CNT-016                |
| 635 | <b>M635</b> | C1[C@@H](C([C@H]2[C@](C1)([C@](C@H](CC2=O)C)(CO)O)C(C)C)O             | -5.7 | <i>Aspergillus ustus</i>                    |
| 636 | <b>M636</b> | CC(=C1[C@H](C(=O)N(CCC(=O)OC)C1=O)O)C                                 | -5.7 | <i>Pestalotiopsis</i> sp.                   |
| 637 | <b>M637</b> | C(CCCCC/C=C/C(=O)/C=C\1/O[C@@H](C(=O)N1)CCCC)/C)C                     | -5.7 | <i>Marinispota</i> strain NPS008920         |
| 638 | <b>M638</b> | c1c2c(ccc1)c(c[nH]2)CC(=O)O                                           | -5.6 | <i>Aspergillus</i> sp.                      |
| 639 | <b>M639</b> | [C@H]1(OC(=O)C=C1)[C@H]([C@H](C)O)O)[C@H](C)O                         | -5.6 | <i>Aspergillus</i> sp. 16-02-1              |
| 640 | <b>M640</b> | [C@H]1([C@H](OC(=O)C=C1)[C@@H]([C@@H](C)O)OC)C)O                      | -5.6 | <i>Aspergillus</i> sp. 16-02-1              |
| 641 | <b>M641</b> | [C@H](/C=C/C=C/C(=C)\CO)(C)O                                          | -5.6 | <i>Aspergillus</i> sp. 16-02-1              |
| 642 | <b>M642</b> | C1CCC[C@H]2[C@H]1[NH2+][C@@H]2C=O                                     | -5.6 | <i>Jishengella endophytica</i> 161111       |
| 643 | <b>M643</b> | O1[C@H](C=C(C1=O)[C@H]([C@H](C)O)O)[C@H](C)O                          | -5.6 | <i>Aspergillus</i> sp. 16-02-1              |
| 644 | <b>M644</b> | C1(=O)N[C@H](C(=O)N2[C@H]1CCC2)C                                      | -5.5 | <i>Aspergillus</i> sp.                      |
| 645 | <b>M645</b> | [C@@H]1(O[C@H]([C@@H]([C@H]([C@H]1O)O)O)OC(C)C)CO                     | -5.5 | <i>Aspergillus</i> sp.                      |
| 646 | <b>M646</b> | S([C@]12N([C@H]3C=CC=C[C@@H]3O)C1C(=O)[C@@](SC)(N(C2=O)C)CO)C         | -5.5 | <i>Aspergillus</i> sp.                      |
| 647 | <b>M647</b> | [C@H]1(OC(=O)C=C1)[C@@H]([C@@H](C)O)O)[C@H](C)O                       | -5.5 | <i>Aspergillus</i> sp. 16-02-1              |
| 648 | <b>M648</b> | [C@H]1(OC(=O)C=C1)[C@@H]([C@@H](C)O)OC)[C@H](C)O                      | -5.5 | <i>Aspergillus</i> sp. 16-02-1              |
| 649 | <b>M649</b> | [C@@H]1(OC(=O)/C=C/[C@H](C)O)/[C@H]1O)[C@@H](C)O                      | -5.5 | <i>Aspergillus ochraceus</i> MA-15          |
| 650 | <b>M650</b> | [C@H]1([C@H](OC(=O)C=C1)CC(=O)C)C)C                                   | -5.5 | <i>Aspergillus ochraceus</i> MA-15          |
| 651 | <b>M651</b> | [C@@]12([C@@H]([C@@]3([C@](C[C@@H]1OC(=O)C)(C=C[C@H]3O)C)CO)CC2(C)C)O | -5.5 | <i>Hansfordia sinuosae</i>                  |
| 652 | <b>M652</b> | O1[C@H](C=C(C1=O)[C@@H]([C@@H](C)O)O)[C@H](C)O                        | -5.5 | <i>Aspergillus</i> sp. 16-02-1              |
| 653 | <b>M653</b> | O1[C@H](C=C(C1=O)[C@@H]([C@@H](C)O)OC)[C@H](C)O                       | -5.5 | <i>Aspergillus</i> sp. 16-02-1              |
| 654 | <b>M654</b> | [C@H]1([C@H](C=C(C(=O)O)1)C[C@H](C)O)O)C                              | -5.5 | <i>Aspergillus</i> sp. 16-02-1              |
| 655 | <b>M655</b> | [C@H]1([C@H](OC(=O)C=C1)[C@@H]([C@H](C)Cl)O)C)O                       | -5.5 | <i>Aspergillus versicolor</i> ZBY-3         |
| 656 | <b>M656</b> | c1ccc(cc1)/C=C/C(=O)O                                                 | -5.5 | <i>Penicillium</i> sp. PR19N-1              |
| 657 | <b>M657</b> | c1c2[nH]cc(c2ccc1)CCO                                                 | -5.4 | <i>Aspergillus</i> sp.                      |
| 658 | <b>M658</b> | [C@H]1(OC(=O)C=C1)C[C@@H](C)O)[C@H](C)O                               | -5.4 | <i>Aspergillus</i> sp. 16-02-1              |

|     |             |                                                              |      |                                     |
|-----|-------------|--------------------------------------------------------------|------|-------------------------------------|
| 659 | <b>M659</b> | <chem>[C@H]1(OC(=O)C(=C1)C[C@H](C)O)[C@H](C)O</chem>         | -5.4 | <i>Aspergillus</i> sp. 16-02-1      |
| 660 | <b>M660</b> | <chem>[C@H]1(OC(=O)C(=C1)CC(=O)[C@H](C)O)C</chem>            | -5.4 | <i>Aspergillus ochraceus</i> MA-15  |
| 661 | <b>M661</b> | <chem>[C@H](C(=C)C(=O)O)(C(=O)OC)CCCCCO</chem>               | -5.4 | <i>Aspergillus niger</i>            |
| 662 | <b>M662</b> | <chem>[C@H](C(=C)C(=O)O)(C(=O)O)CCCCCOC(=O)C</chem>          | -5.4 | <i>Aspergillus niger</i>            |
| 663 | <b>M663</b> | <chem>O1[C@H](C=C(C1=O)C[C@@H](O)C)[C@H](C)O</chem>          | -5.4 | <i>Aspergillus</i> sp. 16-02-1      |
| 664 | <b>M664</b> | <chem>c1c2c(ccc1)c(c[nH]2)C=O</chem>                         | -5.3 | <i>Aspergillus</i> sp.              |
| 665 | <b>M665</b> | <chem>C[C@@H]([C@H]1C=C(C(=O)O1)CC(=O)C)O</chem>             | -5.3 | <i>Aspergillus</i> sp. 16-02-1      |
| 666 | <b>M666</b> | <chem>O1[C@H](C=C(C1=O)CC(=O)C)[C@H](C)O</chem>              | -5.3 | <i>Aspergillus</i> sp. 16-02-1      |
| 667 | <b>M667</b> | <chem>O1[C@H](C=C(C1=O)C[C@H](O)C)[C@H](C)O</chem>           | -5.3 | <i>Aspergillus</i> sp. 16-02-1      |
| 668 | <b>M668</b> | <chem>CC(=O)/C=C/C=C/[C@@H](C)O)/CO</chem>                   | -5.3 | <i>Aspergillus</i> sp. 16-02-1      |
| 669 | <b>M669</b> | <chem>O[C@@H]1[C@@H](O)[C@@H]([C@H](O[C@H]1CO)O)CCC)O</chem> | -5.2 | <i>Aspergillus</i> sp.              |
| 670 | <b>M670</b> | <chem>C1(OC(=O)C(=C1)CC[C@H](C)O)(C)C</chem>                 | -5.2 | <i>Aspergillus</i> sp. 16-02-1      |
| 671 | <b>M671</b> | <chem>C1[C@@H](CC(=O)C/C=C/[C@H](CC(=O)O[C@@H]1C)O)OC</chem> | -5.2 | <i>Dendrodochium</i> sp.            |
| 672 | <b>M672</b> | <chem>O1[C@H](C=C(C1=O)CC[C@H](C)O)C</chem>                  | -5.2 | <i>Aspergillus</i> sp. 16-02-1      |
| 673 | <b>M673</b> | <chem>C[C@@H](/C=C/C=C/[C@H](C)O)\CO)O</chem>                | -5.2 | <i>Aspergillus</i> sp. 16-02-1      |
| 674 | <b>M674</b> | <chem>C[C@@H](C1=CC(=CC(=O)[OH+])1)OC)O</chem>               | -5.2 | <i>Nigrospora</i> sp.               |
| 675 | <b>M675</b> | <chem>N12[C@H](C(=O)NCC1=O)CCC2</chem>                       | -5.1 | <i>Aspergillus</i> sp.              |
| 676 | <b>M676</b> | <chem>c1cc(ccc1)CCC(=O)O</chem>                              | -5.1 | <i>Aspergillus</i> sp.              |
| 677 | <b>M677</b> | <chem>C[C@@H](/C=C/C=C/[C@H](C)O)\CO)O</chem>                | -5.1 | <i>Aspergillus</i> sp. 16-02-1      |
| 678 | <b>M678</b> | <chem>c1cc(c(cc1)O)CC=O</chem>                               | -4.8 | <i>Aspergillus</i> sp.              |
| 679 | <b>M679</b> | <chem>C1=C(CO)C(=O)[C@H]2[C@@H]([C@@H]1O)O2</chem>           | -4.8 | <i>Nigrospora</i> sp.               |
| 680 | <b>M680</b> | <chem>c1cc(ccc1)[C@H](CO)O</chem>                            | -4.7 | <i>Aspergillus</i> sp.              |
| 681 | <b>M681</b> | <chem>c1(c(cccc1)O)CN</chem>                                 | -4.7 | <i>Aspergillus</i> sp.              |
| 682 | <b>M682</b> | <chem>c1ccc(cc1)C(=O)O</chem>                                | -4.6 | <i>Aspergillus</i> sp.              |
| 683 | <b>M683</b> | <chem>N1[C@@H](CCC1=O)[C@H](OC)O</chem>                      | -4.6 | <i>Aspergillus</i> sp.              |
| 684 | <b>M684</b> | <chem>C(CO)C(=O)[C@@H]1CC(=O)OC1</chem>                      | -4.5 | <i>Penicillium</i> sp. PSU-F44      |
| 685 | <b>M685</b> | <chem>n1cnc(c2c1nc[nH]2)N</chem>                             | -4.4 | <i>Aspergillus</i> sp.              |
| 686 | <b>M686</b> | <chem>[nH]1c(=O)[nH]c(=O)c(c1)C</chem>                       | -4.4 | <i>Aspergillus</i> sp.              |
| 687 | <b>M687</b> | <chem>c1(ccc(o1)CO)C=O</chem>                                | -4.4 | <i>Penicillium chrysogenum</i> HGQ6 |
| 688 | <b>M688</b> | <chem>O1[C@H](C=C(C1=O)CCO)C</chem>                          | -4.4 | <i>Aspergillus</i> sp. 16-02-1      |
| 689 | <b>M689</b> | <chem>c1c(=O)[nH]c(=O)[nH]c1</chem>                          | -3.9 | <i>Aspergillus</i> sp.              |
| 690 | <b>M690</b> | <chem>[C@H]([C@@H](O)C)(O)C</chem>                           | -3.1 | <i>Aspergillus</i> sp.              |

**Table S2.** Docked and MD-refined structures of SARS-CoV-2 Mpro + top-lead ligands.



| N <sup>o</sup> | Name | Docked structure                                                                                                                                                                                                                                                                                                                                                                                                                                                                                                                                                                      | MD-refined structure                                                                                                                                                                                                                                                                                                                                                                                                   |
|----------------|------|---------------------------------------------------------------------------------------------------------------------------------------------------------------------------------------------------------------------------------------------------------------------------------------------------------------------------------------------------------------------------------------------------------------------------------------------------------------------------------------------------------------------------------------------------------------------------------------|------------------------------------------------------------------------------------------------------------------------------------------------------------------------------------------------------------------------------------------------------------------------------------------------------------------------------------------------------------------------------------------------------------------------|
| 1              | M15  | 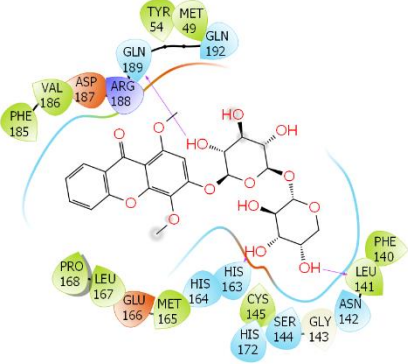 <p>Diagram showing the docked structure of M15 (a complex polycyclic molecule) within a protein binding pocket. The protein residues are represented by colored circles with labels: TYR 54, MET 49, GLN 192, GLN 189, ASP 187, ARG 188, VAL 186, PHE 185, PRO 168, LEU 167, GLU 166, MET 165, HIS 164, HIS 163, CYS 145, SER 144, HIS 172, LEU 141, ASN 142, PHE 140, MET 145, and CYS 144.</p>                                                                                                    |  <p>Diagram showing the MD-refined structure of M15. The protein residues are represented by colored circles with labels: TYR 54, HIS 41, MET 49, GLN 192, GLN 189, ARG 188, ASP 187, VAL 186, PHE 185, PRO 168, LEU 167, MET 166, HIS 164, HIS 163, HIS 172, CYS 145, SER 144, PHE 140, LEU 141, ASN 142, GLY 143, and CYS 144.</p> |
| 2              | M8   |  <p>Diagram showing the docked structure of M8 (a complex polycyclic molecule) within a protein binding pocket. The protein residues are represented by colored circles with labels: GLN 192, ALA 191, THR 190, GLN 189, ARG 188, LEU 187, ASP 187, VAL 186, PHE 185, MET 165, HIS 164, LEU 164, THR 27, THR 26, THR 25, CYS 145, GLY 143, ASN 142, MET 49, and SER 46.</p>                                                                                                                          |  <p>Diagram showing the MD-refined structure of M8. The protein residues are represented by colored circles with labels: PHE 185, VAL 186, PRO 168, ASP 187, ARG 188, LEU 167, MET 166, HIS 164, THR 27, THR 26, THR 25, CYS 145, GLY 143, ASN 142, HIS 41, MET 49, and SER 46.</p>                                                  |
| 3              | M11  |  <p>Diagram showing the docked structure of M11 (a complex polycyclic molecule) within a protein binding pocket. The protein residues are represented by colored circles with labels: GLU 166, GLN 189, ARG 188, ASP 187, VAL 186, TYR 54, HIS 41, HIS 163, HIS 164, HIS 172, PHE 140, LEU 141, ASN 142, GLY 143, SER 144, CYS 145, THR 25, MET 49, and MET 165.</p>                                                                                                                                |  <p>Diagram showing the MD-refined structure of M11. The protein residues are represented by colored circles with labels: GLU 166, GLN 192, GLN 189, ARG 188, TYR 54, ASP 187, VAL 186, HIS 41, HIS 163, HIS 172, PHE 140, LEU 141, ASN 142, GLY 143, SER 144, CYS 145, LEU 27, THR 25, MET 49, and MET 165.</p>                    |
| 4              | M9   |  <p>Diagram showing the docked structure of M9 (a complex polycyclic molecule) within a protein binding pocket. The protein residues are represented by colored circles with labels: ASN 142, GLY 143, SER 144, LEU 27, THR 26, THR 25, MET 49, VAL 42, HIS 41, PHE 185, VAL 186, HIS 164, MET 165, ASP 187, ARG 166, GLU 167, ARG 188, LEU 167, GLN 189, PRO 168, THR 190, ALA 191, MET 166, MET 165, THR 25, THR 26, CYS 145, THR 25, PHE 185, LEU 26, HIS 164, LEU 27, CYS 145, and THR 25.</p> |  <p>Diagram showing the MD-refined structure of M9. The protein residues are represented by colored circles with labels: MET 49, SER 46, HIS 41, THR 25, THR 26, CYS 145, THR 25, PHE 185, LEU 26, HIS 164, LEU 27, CYS 145, and THR 25.</p>                                                                                       |

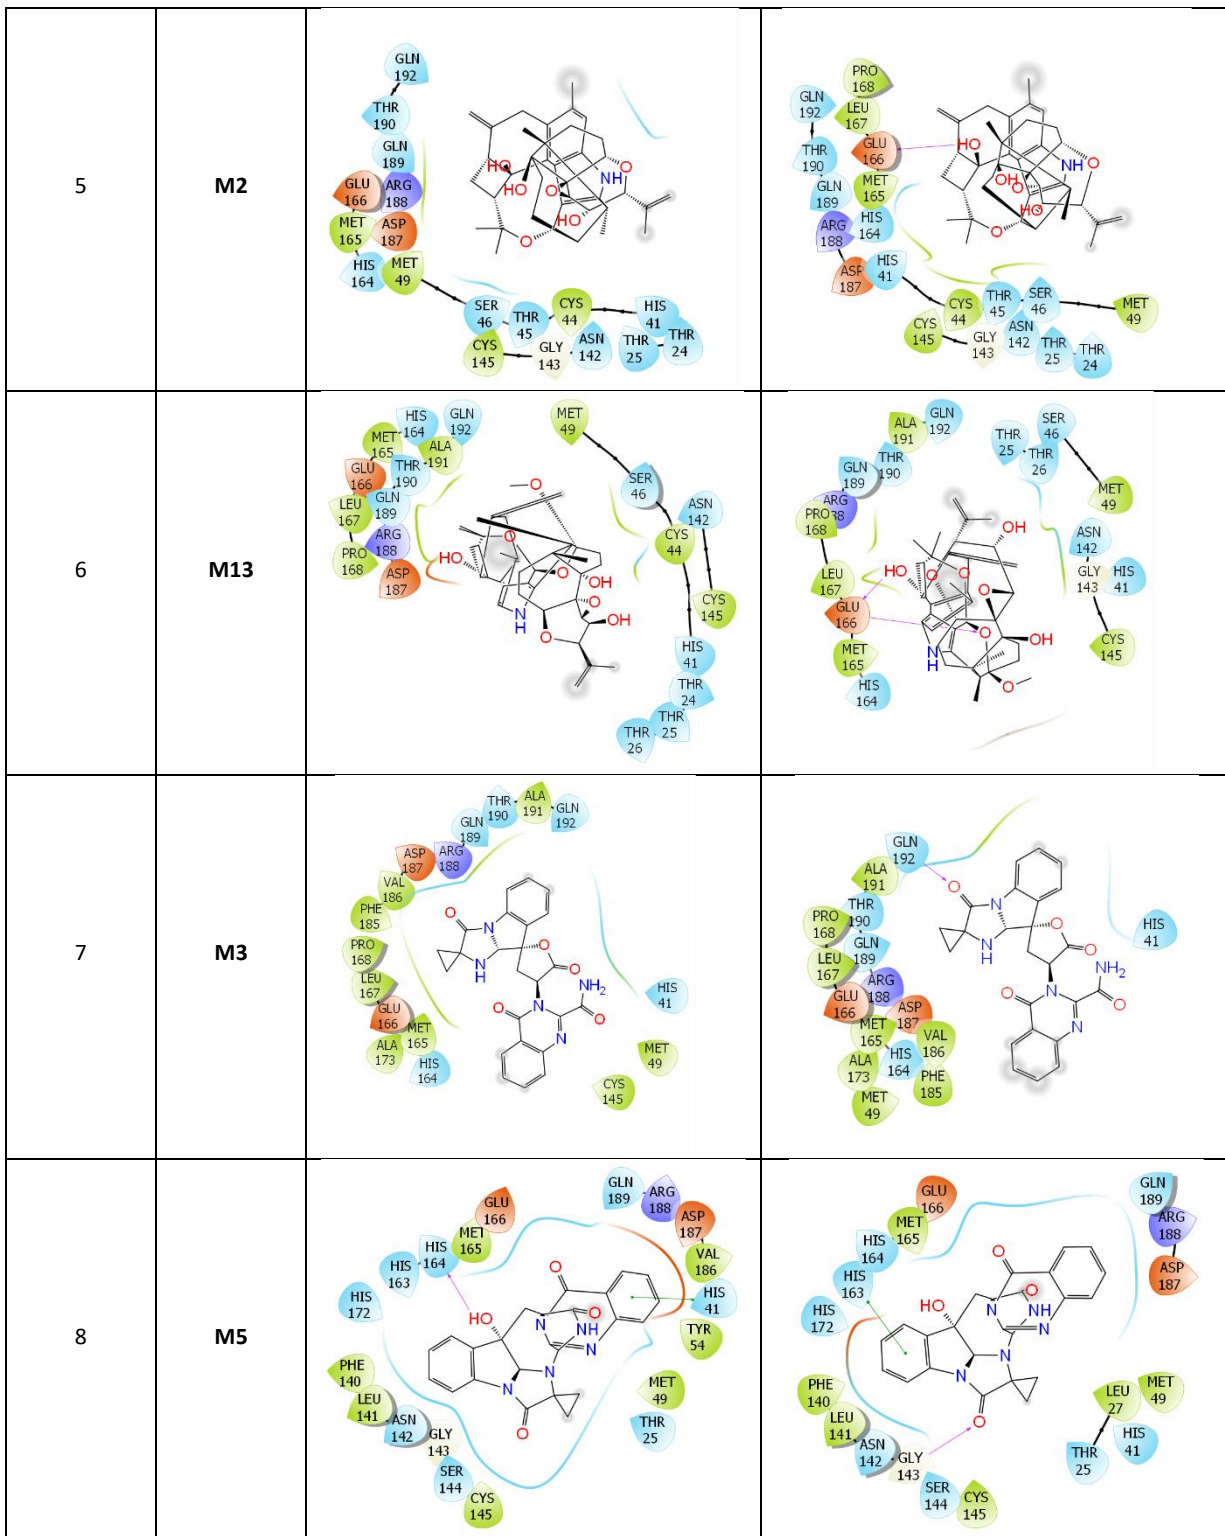

|    |     |  |  |
|----|-----|--|--|
| 9  | M4  |  |  |
| 10 | M16 |  |  |
| 11 | M6  |  |  |
| 12 | M1  |  |  |

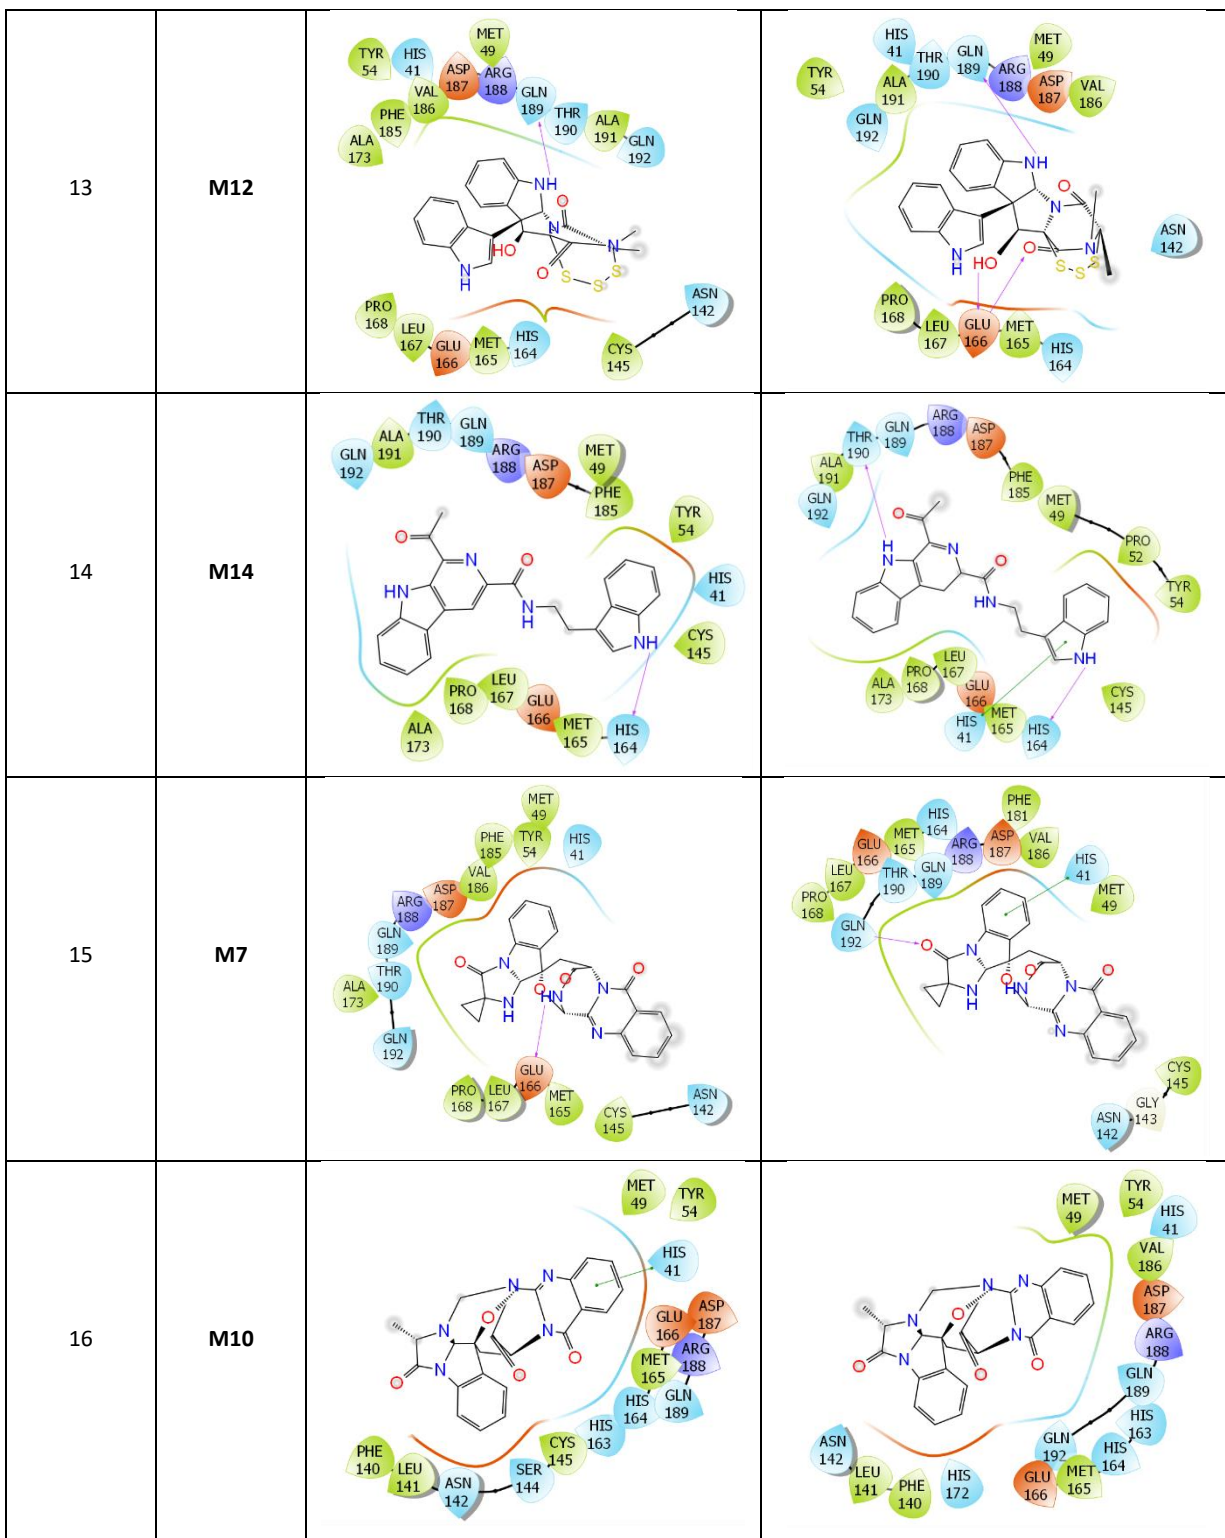

**Table S3.** The pulling force in displacement dependence over FPL simulations

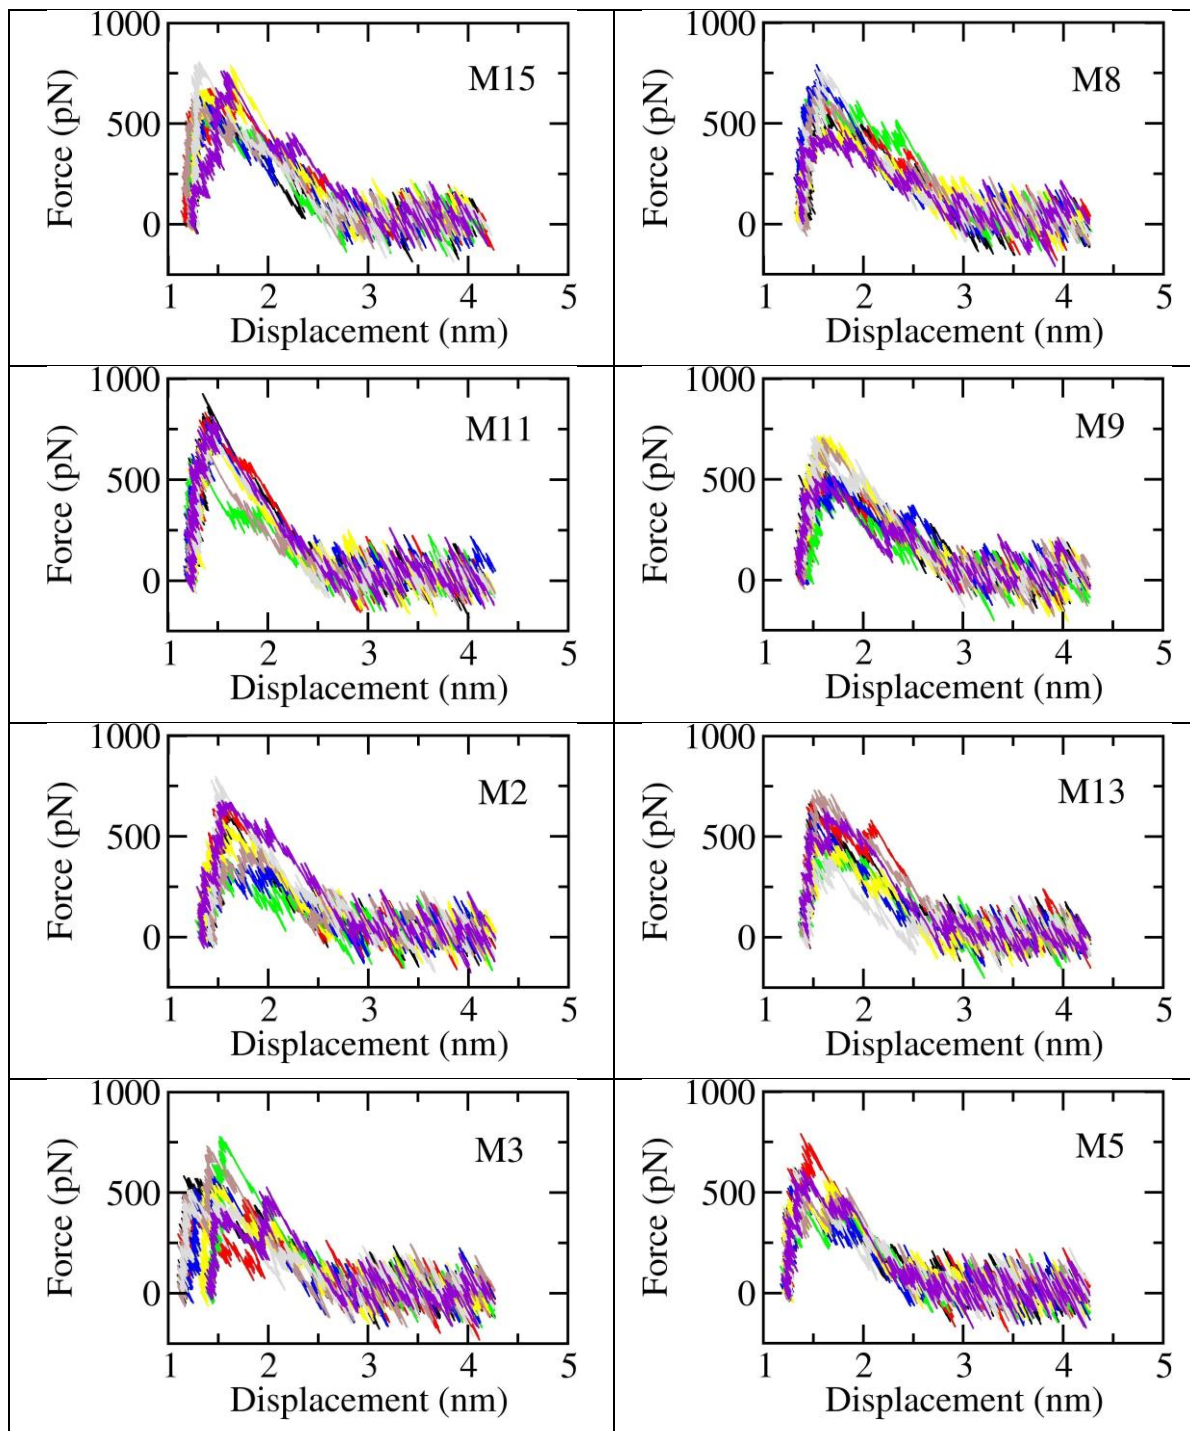

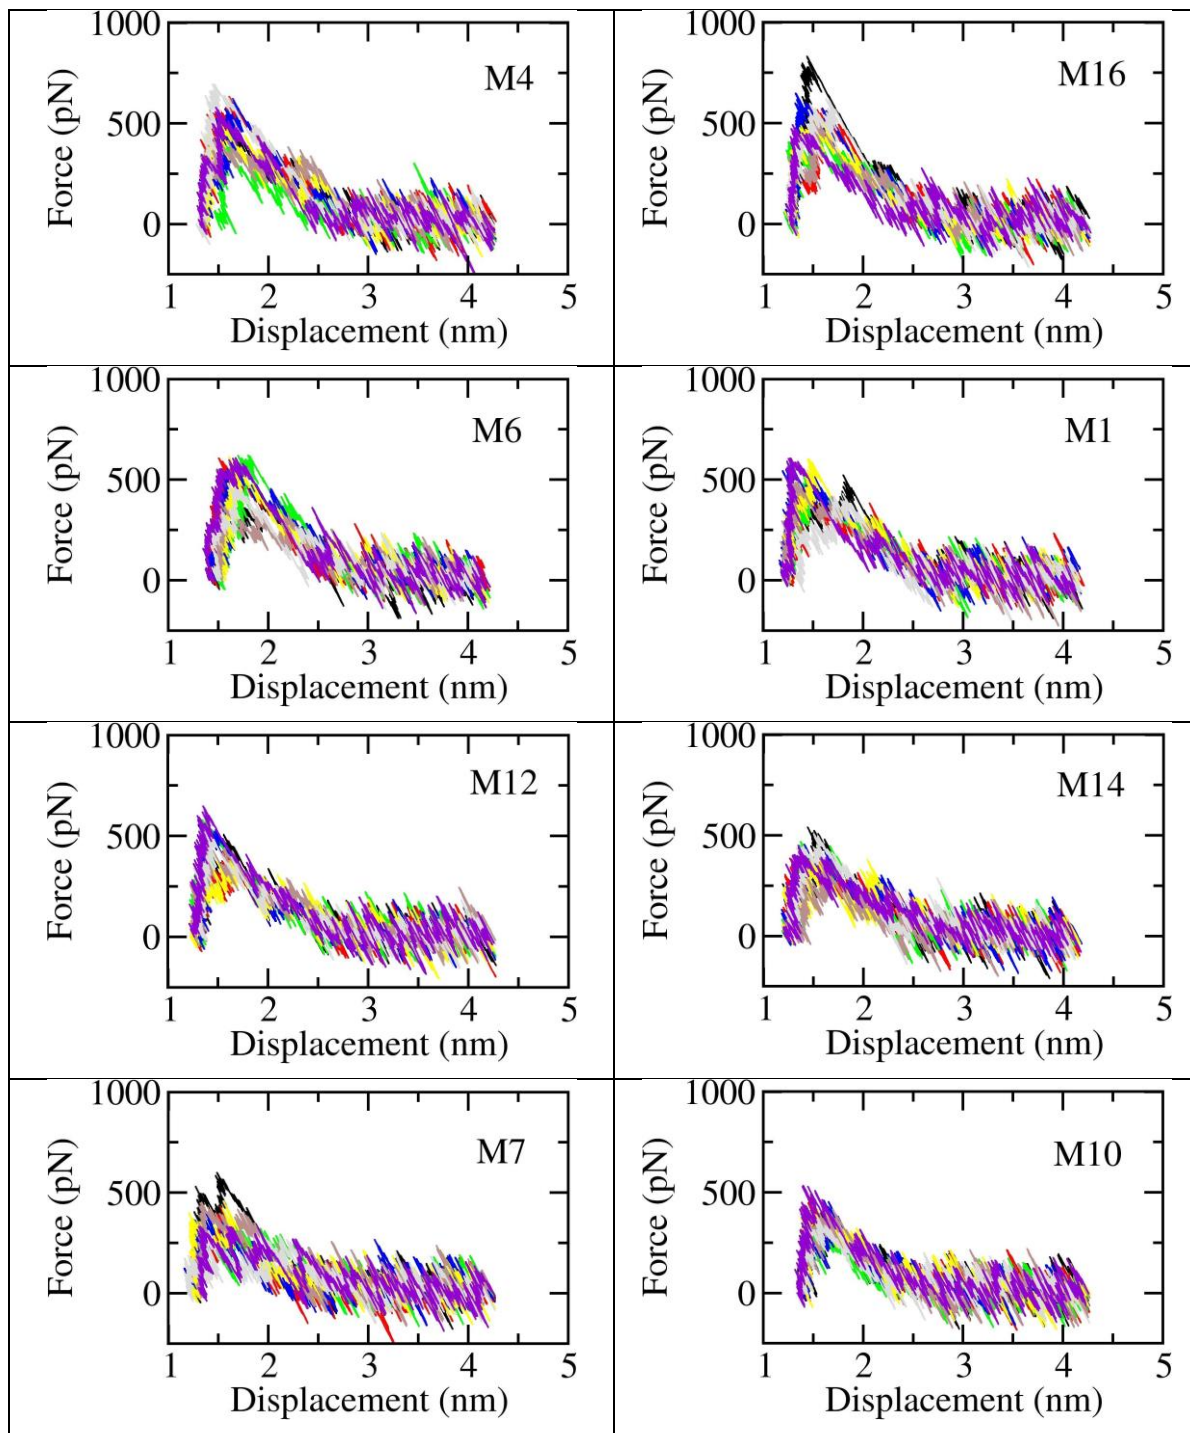

**Table S4.** The computational values using FPL simulations of available inhibitors.

| N <sup>o</sup> | Compound                         | $F_{Max}$    | $W$        | $\Delta G_{EXP}^a$ |
|----------------|----------------------------------|--------------|------------|--------------------|
| 1              | Atazanavir                       | 762.8 ± 44.8 | 83.7 ± 3.5 | -8.64              |
| 2              | Candesartan Cilexetil            | 682.6 ± 15.7 | 68.2 ± 2.3 | -9.23              |
| 3              | Chloroquine                      | 417.3 ± 40.9 | 34.5 ± 2.8 | -8.56              |
| 4              | Cimetidine                       | 513.0 ± 29.7 | 46.5 ± 3.9 | -7.51              |
| 5              | Maribavir                        | 377.0 ± 19.4 | 33.9 ± 1.5 | -7.51              |
| 6              | Omeprazole                       | 361.4 ± 31.1 | 28.2 ± 2.4 | -8.03              |
| 7              | Oxytetracycline                  | 448.1 ± 30.7 | 37.9 ± 2.7 | -8.22              |
| 8              | Roxatidine Acetate Hydrochloride | 652.2 ± 31.7 | 62.2 ± 3.3 | -8.05              |
| 9              | Sulfacetamide                    | 282.6 ± 19.0 | 16.0 ± 1.4 | -7.51              |
| 10             | Valacyclovir Hydrochloride       | 492.8 ± 20.9 | 49.8 ± 3.3 | -8.16              |

<sup>a</sup>The experimental binding free energy was obtained through inhibition constant  $k_i$ .<sup>1</sup> The unit of energy and force are in kcal mol<sup>-1</sup> and pN, respectively.

**Table S5.** ADME profile of potential compounds

| Compound   | Molecular Weight | HIA    | BBR    | Carcinogenicity | LD <sub>50</sub> (mg/kg) | Toxicity prediction <sup>a</sup> |
|------------|------------------|--------|--------|-----------------|--------------------------|----------------------------------|
| <b>M8</b>  | 722.18           | 0.6252 | 0.5804 | 0.9571          | 300                      | 3                                |
| <b>M9</b>  | 722.18           | 0.6252 | 0.5804 | 0.9502          | 300                      | 3                                |
| <b>M11</b> | 429.14           | 0.6725 | 0.6995 | 0.7880          | 75                       | 3                                |
| <b>M15</b> | 552.15           | 0.9105 | 0.9401 | 0.9717          | 5000                     | 5                                |

<sup>a</sup>Toxicity prediction class: 1 → 6 (High toxicity to non-toxic). The ADME was calculated via admetSAR<sup>2</sup> and ProTOX-II<sup>3</sup> webserver.

## Reference

1. Z. Li, X. Li, Y.-Y. Huang, Y. Wu, R. Liu, L. Zhou, Y. Lin, D. Wu, L. Zhang, H. Liu, X. Xu, K. Yu, Y. Zhang, J. Cui, C.-G. Zhan, X. Wang and H.-B. Luo, *Proc. Natl. Acad. Sci. U.S.A.*, 2020, **117**, 27381-27387.
2. F. Cheng, W. Li, Y. Zhou, J. Shen, Z. Wu, G. Liu, P. W. Lee and Y. Tang, *J. Chem. Inf. Model.*, 2012, **52**, 3099-3105.
3. P. Banerjee, A. O. Eckert, A. K. Schrey and R. Preissner, *Nucleic Acids Res* 2018, **46**, W257-W263.
